# Supplementary material for: Newly identified C–H⋯O hydrogen bond in histidine
Source: Royal Society of Chemistry journal article supplement (doi:10.1039/d2cp02048c), 2022-01-01
Supplement: d2cp02048c1.pdf [file d2cp02048c1.pdf]

## Supporting Information

### Newly Identified C–H···O Hydrogen Bond in Histidine

Ryan M. Steinert<sup>1</sup>, Chandana Kasireddy<sup>2</sup>, Micah E. Heikes<sup>3</sup>, Katie R. Mitchell-Koch<sup>4\*</sup>

#### Author Affiliations:

<sup>1</sup>Department of Chemistry and Biochemistry, Wichita State University, 1845 Fairmount Street, Wichita, KS 67260-0051

<sup>2</sup>Department of Chemistry and Biochemistry, Wichita State University, 1845 Fairmount Street, Wichita, KS 67260-0051. Current Address: 1973 Kings Knot Ct, Apex, NC, 27519.

<sup>3</sup>Department of Chemistry and Biochemistry, Wichita State University, 1845 Fairmount Street, Wichita, KS 67260-0051

<sup>4</sup>Department of Chemistry and Biochemistry, Wichita State University, 1845 Fairmount Street, Wichita, KS 67260-0051; \*Corresponding author email address: katie.mitchell-koch@wichita.edu

#### Table of Contents:

- A. Optimized Geometries and Geometric Parameters for N–H···O and N–methylacetamide Complexes (p. 2-4)
- B. Additional Data Analysis Details
  - i. Calculation of total NPA charge transferred from water (or acetone) to the respective 5-methylimidazole isomer (p. 5)
  - ii. Calculation of bond critical points using AIM-UC software (p. 5)
  - iii. Experimental control for BCP analysis (p. 5)
- C. Additional Data Tables and Graphs
  - i. New IR bands upon complex formation (p. 6)
  - ii. Presentation of a wide variety of correlations and linear regression parameters (p. 7-9)
  - iii. The effect of solvent dielectric on  $\Delta E_{MP2}$  of complex formation (p. 10-11)
- D. Electrostatic Potential Surfaces for a Selection of H-bonding Complexes (p. 12-17)
- E. Addressing Basis Set Superposition Error (p. 18)
- F. Other Potential C–H···O Hydrogen Bonds Found in XRD Structures (p. 19-25)
- G. Atomic Coordinates for Geometrically Optimized Complexes (p. 26-61)

## A. Optimized Geometries and Geometric Parameters for N–H···O and N–methylacetamide Complexes.

tau-5-methylimidazole  
/N3–H···water

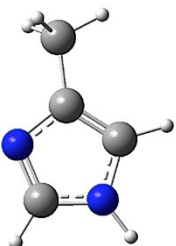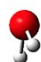

pi-5-methylimidazole  
/N1–H···water

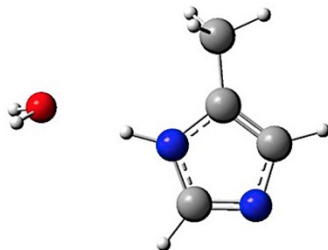

5-methylimidazolium  
/N1–H···water

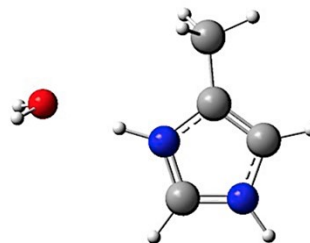

5-methylimidazolium  
/N3–H···water

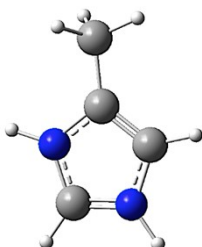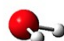

tau-5-methylimidazole  
/N3–H···acetone

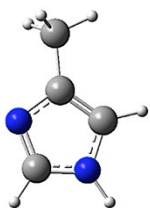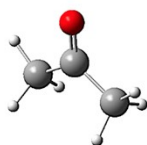

pi-5-methylimidazole  
/N1–H···acetone

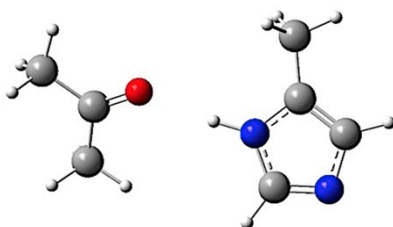

5-methylimidazolium  
/N1–H···acetone

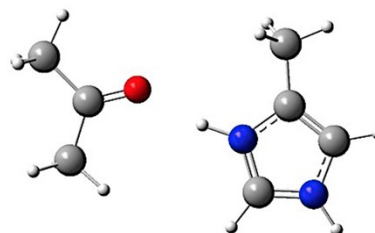

**5-methylimidazolium**  
/N3-H...acetone

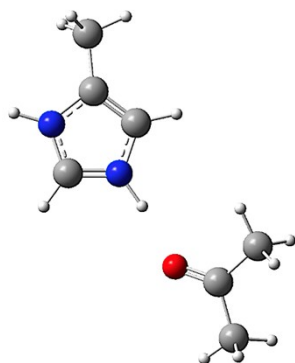

**Figure S1.** BHandHLYP/6-31+G(d,p) optimized geometries of the water and acetone complexes. Atoms are displayed with covalent radii scaled to 50%. Atom coloring scheme: carbon (grey), hydrogen (white), nitrogen (blue), oxygen (red). Visual images captured from GaussView 5.0 software. Note that the imidazolium species carry a +1 charge.

**tau-5-methylimidazole**  
/C4( $\delta$ )-H...amide

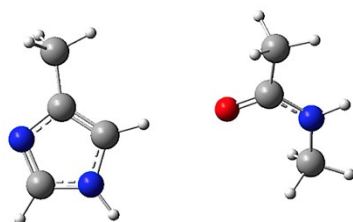

**pi-5-methylimidazole**  
/C4( $\delta$ )-H...amide

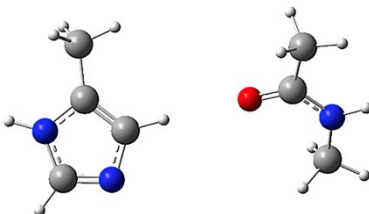

**5-methylimidazolium**  
/C4( $\delta$ )-H...amide

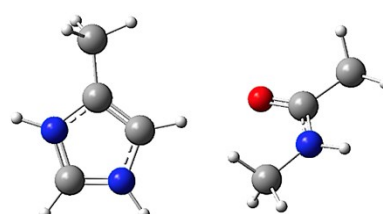

**tau-5-methylimidazole**  
/C2( $\epsilon$ )-H...amide

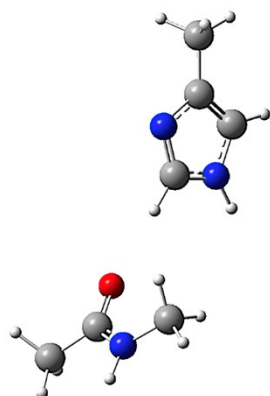

**pi-5-methylimidazole**  
/C2( $\epsilon$ )-H...amide

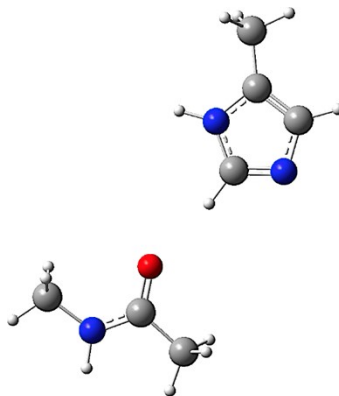

**5-methylimidazolium**  
/C2( $\epsilon$ )-H...amide

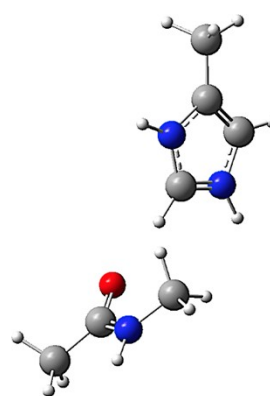

**Figure S2.** BHandHLYP/6-31+G(d,p) optimized geometries of the N-methylacetamide ("amide") complexes. Atoms are displayed with covalent radii scaled to 50%. Atom coloring scheme: carbon (grey), hydrogen (white), nitrogen (blue), oxygen (red). Visual images captured from GaussView 5.0 software. Note that the imidazolium species carry a +1 charge.

**Table S1. Geometric data for complexes optimized at the BHandHLYP/6-31+G(d,p) level with C-PCM solvation (water). Complexes can be seen in Figures S1 and S2.**

| Complex Name                                | H-bond length (Å) | O - - - C or O - - - N distance (Å) | C-H...O or N-H...O angle (degrees) |
|---------------------------------------------|-------------------|-------------------------------------|------------------------------------|
| <i>tau-5-methylimidazole/C4-H...water</i>   | 2.30              | 3.37                                | 176                                |
| <i>tau-5-methylimidazole/C2-H...water</i>   | 2.26              | 3.34                                | 179                                |
| <i>pi-5-methylimidazole/C4-H...water</i>    | 2.39              | 3.47                                | 178                                |
| <i>pi-5-methylimidazole/C2-H...water</i>    | 2.27              | 3.34                                | 179                                |
| <i>5-methylimidazolium/C4-H...water</i>     | 2.14              | 3.22                                | 176                                |
| <i>5-methylimidazolium/C2-H...water</i>     | 2.03              | 3.11                                | 179                                |
| <i>tau-5-methylimidazole/C4-H...acetone</i> | 2.34              | 3.41                                | 178                                |
| <i>tau-5-methylimidazole/C2-H...acetone</i> | 2.30              | 3.38                                | 177                                |
| <i>pi-5-methylimidazole/C4-H...acetone</i>  | 2.46              | 3.54                                | 179                                |
| <i>pi-5-methylimidazole/C2-H...acetone</i>  | 2.30              | 3.38                                | 176                                |
| <i>5-methylimidazolium/C4-H...acetone</i>   | 2.17              | 3.24                                | 170                                |
| <i>5-methylimidazolium/C2-H...acetone</i>   | 2.04              | 3.12                                | 175                                |
| <i>tau-5-methylimidazole/C4-H...amide</i>   | 2.27              | 3.34                                | 175                                |
| <i>tau-5-methylimidazole/C2-H...amide</i>   | 2.23              | 3.31                                | 174                                |
| <i>pi-5-methylimidazole/C4-H...amide</i>    | 2.40              | 3.48                                | 178                                |
| <i>pi-5-methylimidazole/C2-H...amide</i>    | 2.24              | 3.31                                | 174                                |
| <i>5-methylimidazolium/C4-H...amide</i>     | 2.10              | 3.17                                | 174                                |
| <i>5-methylimidazolium/C2-H...amide</i>     | 1.97              | 3.04                                | 172                                |
| <i>tau-5-methylimidazole/N3-H...water</i>   | 1.89              | 2.90                                | 178                                |
| <i>pi-5-methylimidazole/N1-H...water</i>    | 1.89              | 2.90                                | 179                                |
| <i>5-methylimidazolium/N1-H...water</i>     | 1.76              | 2.78                                | 179                                |
| <i>5-methylimidazolium/N3-H...water</i>     | 1.75              | 2.78                                | 179                                |
| <i>tau-5-methylimidazole/N3-H...acetone</i> | 1.90              | 2.91                                | 176                                |
| <i>pi-5-methylimidazole/N1-H...acetone</i>  | 1.90              | 2.91                                | 174                                |
| <i>5-methylimidazolium/N1-H...acetone</i>   | 1.76              | 2.78                                | 170                                |
| <i>5-methylimidazolium/N3-H...acetone</i>   | 1.75              | 2.77                                | 173                                |

## B. Additional Data Analysis Details.

### *i. Calculation of total NPA charge transferred from water (or acetone) to the respective 5-methylimidazole isomer:*

To calculate the total NPA charge transfer from electron pair donor to electron pair acceptor for the water complexes, the NPA atomic charges for all the atoms of water in respective complexes were summed up and noted to be positive for all complexes. The sum of the NPA charges on the atoms in isolated water (sum = 0) were then subtracted from this number. As would be expected, the sum of the atomic charges for the isolated water were almost always 0.000. Occasionally, the sum of the charges in a molecule that should have no net charge will be  $\pm 0.001$  e. For charge transfer calculations in the acetone complexes, the same procedure as above was followed, but instead using summations of the NPA charges on acetone atoms. Again, the sum of the atomic charges of acetone in the acetone complexes were found to be positive, indicating a transfer of electron density from acetone to 5-methylimidazole.

### *ii. Calculation of Bond Critical Points using AIM-UC software:*

In the AIM-UC v1.6.4 software, the “Find 3D Critical Points” under the “Process” tab was used to visually display the bond critical points in the complexes using the density cube files (see page S12). The default settings of the program for the bond critical point search were as follows:

Min. Density: 0.001  
Nuclear Density: 0.4  
Min Atom Radius: 0.16  
Convergence:  $1 \times 10^{-6}$

These default settings were not changed. In this way, BCP data was gathered for all of the complexes, as seen in Table 9.

### *iii. Experimental Control for BCP Analysis:*

To give confidence that the bond critical points calculated for the complexes weren't simply artifacts, the following control study was conducted. The BHandHLYP/6-31+G(d,p) optimized pi-C4 complexes for both water and acetone were selected for the study. In each respective complex, the H-bond length was increased by 1.000 Å and a single point energy calculation at the MP2/aug-cc-pVTZ level was performed. Only the intermolecular distance was altered to increase the H-bond length; no intramolecular changes in either the water (or acetone) and 5-methylimidazole were made. From there, new density cube files were generated and examined in AIM-UC for bond critical points. It was observed, that upon increasing the H-bond length in the water complex by 1.000 Å, a BCP was still detected ( $\rho = 0.001053$  au,  $\nabla^2\rho = 0.004769$ ). However, the electron density at the BCP of 0.001053 au falls well below the expected value ( $\sim 0.024$ - $0.139$  au) for an H-bonding interaction reported by Koch and Popelier (1995). Upon increasing the H-bond length by 2.000 Å in the water complex, no BCP was detected using the AIM-UC default settings listed above. For the pi-C4 acetone complex it was observed that, upon increasing the H-bond length by 1.000 Å, no BCP was detected using the AIM-UC default settings listed above.

## C. Additional Data Tables and Graphs.

### i. New IR bands upon complex formation:

The new calculated IR bands in Table S2 were determined by visual inspection of the vibrational modes in GaussView 5.0. Only bands with relatively large displacement vectors on the water moiety were included in Table S2.

**Table S2. New calculated IR bands ( $\text{cm}^{-1}$ ) upon complex formation.**

| Complex Name                                | BHandHLYP/6-31+G(d)                      | BHandHLYP/6-31+G(d,p)                      | M06-2X/6-31+G(d,p)                        | MP2/6-31+G(d)                                       | MP2/aug-cc-pVTZ                              |
|---------------------------------------------|------------------------------------------|--------------------------------------------|-------------------------------------------|-----------------------------------------------------|----------------------------------------------|
| <i>tau-5-methylimidazole/C4-H...water</i>   | 134.9, 92.6, 84.5, 53.6, 35.9, 28.1      | 140.8, 136.3, 92.6, 75.3, 65.1, 50.3, 36.3 | 225.7, 202.6, 131.6, 108.5, 37.8, 37.0    | 157.1, 100.9, 97.9, 95.9, 56.4, 53.5, 30.4          | 116.3, 86.4, 72.7, 48.8, 41.6, 18.6          |
| <i>tau-5-methylimidazole/C2-H...water</i>   | 158.8, 95.8, 89.7, 63.4, 45.6, 35.6      | 119.1, 95.1, 75.9, 41.3, 33.9, 25.6        | 184.9, 131.4, 107.4, 79.8, 39.1, 13.5     | 158.9, 101.5, 100.6, 94.0, 57.1, 52.5, 38.0         | 128.6, 122.1, 86.8, 72.6, 48.9, 41.1, 29.5   |
| <i>pi-5-methylimidazole/C4-H...water</i>    | 103.6, 71.7, 69.7, 55.9, 43.4, 18.8      | 139.6, 136.5, 77.1, 74.0, 64.7, 51.2, 19.0 | 207.8, 184.3, 160.3, 85.8, 57.6, 51.1     | 127.9, 107.6, 104.5, 88.1, 56.0, 51.9, 28.1         | 93.5, 77.2, 74.0, 47.8, 34.0, 27.7           |
| <i>pi-5-methylimidazole/C2-H...water</i>    | 145.7, 94.9, 80.1, 63.8, 45.6, 40.8      | 119.9, 96.1, 87.5, 70.7, 40.6, 39.5        | 222.2, 182.9, 127.7, 108.2, 33.0, 22.8    | 157.3, 102.9, 97.4, 66.2, 53.6, 44.2                | 125.9, 122.5, 87.6, 73.2, 46.3, 40.7, 33.23  |
| <i>5-methylimidazolium/C4-H...water</i>     | 167.1, 118.6, 95.1, 66.3, 45.1, 22.4     | 151.8, 114.8, 97.6, 67.7, 57.6, 41.6       | 236.9, 206.9, 158.1, 124.0, 61.0, 10.0    | 143.6, 124.2, 103.4, 73.7, 63.1, 48.2, 42.6         | 142.5, 131.9, 110.1, 58.5, 50.3, 39.0, 27.2  |
| <i>5-methylimidazolium/C2-H...water</i>     | 156.4, 141.2, 90.5, 61.1, 53.8           | 136.4, 132.1, 130.1, 85.5, 57.5, 51.8      | 211.5, 177.1, 140.2, 59.1, 48.0           | 241.8, 202.0, 139.7, 126.0, 104.4, 65.6, 50.2, 21.2 | 176.0, 123.5, 119.7, 105.6, 52.4, 44.4, 8.91 |
| <i>tau-5-methylimidazole/C4-H...acetone</i> | 51.2, 48.1, 24.9, 23.4, 20.4, 18.3       | 54.4, 50.7, 43.3, 26.7, 22.7, 21.8, 8.11   | 72.7, 65.0, 42.0, 37.2, 19.3              | *                                                   | *                                            |
| <i>tau-5-methylimidazole/C2-H...acetone</i> | 55.5, 45.6, 31.1, 20.3, 15.5, 13.8       | 58.6, 57.5, 43.4, 29.7, 19.7, 16.1, 10.5   | 62.3, 32.9, 28.0, 20.6, 18.3, 6.08        | *                                                   | *                                            |
| <i>pi-5-methylimidazole/C4-H...acetone</i>  | 50.1, 45.0, 29.2, 27.2, 22.3, 15.1       | 51.5, 46.8, 29.8, 28.2, 24.4, 16.0         | 61.5, 47.8, 44.7, 31.6, 22.0, 11.5        | *                                                   | *                                            |
| <i>pi-5-methylimidazole/C2-H...acetone</i>  | 64.4, 51.7, 40.2, 31.1, 27.2, 20.6, 16.3 | 67.4, 53.9, 42.4, 30.7, 22.6, 21.6, 15.6   | 83.5, 71.7, 49.8, 45.6, 43.5, 29.3, 13.0  | *                                                   | *                                            |
| <i>5-methylimidazolium/C4-H...acetone</i>   | 74.6, 70.2, 50.9, 37.9, 25.6, 24.2, 8.93 | 77.3, 70.4, 53.9, 33.9, 30.9, 19.2, 11.3   | 99.5, 91.0, 78.6, 61.8, 33.4, 25.5, 7.67  | *                                                   | *                                            |
| <i>5-methylimidazolium/C2-H...acetone</i>   | 98.8, 70.3, 68.8, 49.0, 29.4, 26.8, 19.4 | 99.0, 74.4, 66.6, 55.6, 35.1, 33.4, 23.7   | 101.7, 93.1, 71.7, 55.0, 39.0, 32.9, 17.4 | *                                                   | *                                            |

\*Unable to geometrically optimize

ii. Presentation of a wide variety of correlations and linear regression parameters:

It is of interest to examine whether various parameters of complex formation are correlated. For example, an IUPAC criterion for H-bonding is that the interaction energy of complex formation shows good correlation with the extent of charge transfer between donor and acceptor. Linear regression parameters were calculated in Microsoft Excel for the various properties at all levels of theory, as shown in Table S3A for water complexes and Table S3B for acetone complexes.

**Table S3A. Linear regression parameters for 5-methylimidazole...water complexes for selected properties.  $\Delta E$  is assumed to equal  $E(\text{complex}) - \Sigma E(\text{separated species})$ .  $\Delta E_{MP2}$  is the change in MP2 energy upon complex formation. Change in NPA charge of hydrogen refers to H atom participating in the H-bond. Change in calculated isotropic shielding on hydrogen atom participating in H-bond is represented by  $\Delta\sigma$ , in units of ppm. The C-H refers to the C-H group of the methylimidazole ring that participates in the H-bond.**

| Level of Theory       | y-axis                                          | x-axis                                       | Slope (m) | Intercept (b) | Coefficient of determination ( $r^2$ ) |
|-----------------------|-------------------------------------------------|----------------------------------------------|-----------|---------------|----------------------------------------|
| BHandHLYP/6-31+G(d)   | $\Delta E_{\text{BHandHLYP}}$ (kcal/mol)        | O...H hydrogen bond length (Å)               | 7.5222    | -18.176       | 0.9742                                 |
|                       | $\Delta E_{\text{BHandHLYP}}$ (kcal/mol)        | C-H...O angle (degrees)                      | 0.1774    | -33.031       | 0.0479                                 |
|                       | $\Delta E_{\text{BHandHLYP}}$ (kcal/mol)        | $\Delta$ C-H Bond length (Å)                 | -405.89   | -0.1482       | 0.9931                                 |
|                       | $\Delta E_{\text{BHandHLYP}}$ (kcal/mol)        | $\Delta$ O-H Bond length of water (Å)        | -5558.5   | 0.3583        | 0.8016                                 |
|                       | Change in NPA charge ( $\Delta e$ ) of hydrogen | $\Delta\sigma$ (ppm)                         | 0.0024    | 0.017         | 0.7199                                 |
|                       | $\Delta E_{\text{BHandHLYP}}$ (kcal/mol)        | Total charge transfer (e) between species    | -196.26   | 0.5514        | 0.9624                                 |
|                       | $\Delta E_{\text{MP2}}$ (kcal/mol)              | electron density (au) at bond critical point | *         | *             | *                                      |
| BHandHLYP/6-31+G(d,p) | $\Delta E_{\text{BHandHLYP}}$ (kcal/mol)        | O...H hydrogen bond length (Å)               | 7.3075    | -17.787       | 0.9722                                 |
|                       | $\Delta E_{\text{BHandHLYP}}$ (kcal/mol)        | C-H...O angle (degrees)                      | -0.0553   | 8.3727        | 0.0066                                 |
|                       | $\Delta E_{\text{BHandHLYP}}$ (kcal/mol)        | $\Delta$ C-H Bond length (Å)                 | -409.89   | -0.2071       | 0.9931                                 |
|                       | $\Delta E_{\text{BHandHLYP}}$ (kcal/mol)        | $\Delta$ O-H Bond length of water (Å)        | -9197.9   | 1.8039        | 0.9921                                 |
|                       | Change in NPA charge ( $\Delta e$ ) of hydrogen | $\Delta\sigma$ (ppm)                         | -0.0054   | 0.0315        | 0.4466                                 |
|                       | $\Delta E_{\text{BHandHLYP}}$ (kcal/mol)        | Total charge transfer (e) between species    | -209.33   | 0.1435        | 0.934                                  |
|                       | $\Delta E_{\text{MP2}}$ (kcal/mol)              | electron density (au) at bond critical point | -211.45*  | 1.1566*       | 0.9536*                                |
| M06-2X/6-31+G(d,p)    | $\Delta E_{\text{M06-2X}}$ (kcal/mol)           | O...H hydrogen bond length (Å)               | 8.0468    | -19.526       | 0.961                                  |
|                       | $\Delta E_{\text{M06-2X}}$ (kcal/mol)           | C-H...O angle (degrees)                      | -0.0718   | 10.76         | 0.3465                                 |
|                       | $\Delta E_{\text{M06-2X}}$ (kcal/mol)           | $\Delta$ C-H Bond length (Å)                 | -378.77   | -0.4148       | 0.9955                                 |
|                       | $\Delta E_{\text{M06-2X}}$ (kcal/mol)           | $\Delta$ O-H Bond length of water (Å)        | -8423     | 0.6187        | 0.631                                  |

|                                                                                                                  |                                                 |                                                    |         |         |        |
|------------------------------------------------------------------------------------------------------------------|-------------------------------------------------|----------------------------------------------------|---------|---------|--------|
|                                                                                                                  | Change in NPA charge ( $\Delta e$ ) of hydrogen | $\Delta\sigma$ (ppm)                               | 0.002   | 0.0167  | 0.4576 |
|                                                                                                                  | $\Delta E_{M06-2X}$ (kcal/mol)                  | Total charge transfer (e) between species          | -199.53 | 0.2187  | 0.9819 |
|                                                                                                                  | $\Delta E_{MP2}$ (kcal/mol)                     | electron density (au) at bond critical point       | *       | *       | *      |
| MP2/6-31+G(d)                                                                                                    | $\Delta E_{MP2}$ (kcal/mol)                     | O...H hydrogen bond length ( $\text{\AA}$ )        | 8.614   | -21.052 | 0.980  |
|                                                                                                                  | $\Delta E_{MP2}$ (kcal/mol)                     | C-H...O angle (degrees)                            | 2.7033  | -485.62 | 0.6375 |
|                                                                                                                  | $\Delta E_{MP2}$ (kcal/mol)                     | $\Delta$ C-H Bond length ( $\text{\AA}$ )          | -412.3  | 1.1508  | 0.9849 |
|                                                                                                                  | $\Delta E_{MP2}$ (kcal/mol)                     | $\Delta$ O-H Bond length of water ( $\text{\AA}$ ) | -5308.5 | 3.5501  | 0.2251 |
|                                                                                                                  | Change in NPA charge ( $\Delta e$ ) of hydrogen | $\Delta\sigma$ (ppm)                               | -0.0152 | -0.0077 | 0.9775 |
|                                                                                                                  | $\Delta E_{MP2}$ (kcal/mol)                     | Total charge transfer (e) between species          | -163.47 | -0.0431 | 0.9793 |
|                                                                                                                  | $\Delta E_{MP2}$ (kcal/mol)                     | electron density (au) at bond critical point       | *       | *       | *      |
| MP2/aug-cc-pVTZ                                                                                                  | $\Delta E_{MP2}$ (kcal/mol)                     | O...H hydrogen bond length ( $\text{\AA}$ )        | 5.4868  | -14.058 | 0.9452 |
|                                                                                                                  | $\Delta E_{MP2}$ (kcal/mol)                     | C-H...O angle (degrees)                            | 2.265   | -406.85 | 0.6338 |
|                                                                                                                  | $\Delta E_{MP2}$ (kcal/mol)                     | $\Delta$ C-H Bond length ( $\text{\AA}$ )          | -340.23 | 0.8315  | 0.9903 |
|                                                                                                                  | $\Delta E_{MP2}$ (kcal/mol)                     | $\Delta$ O-H Bond length of water ( $\text{\AA}$ ) | -10229  | 1.8579  | 0.7392 |
|                                                                                                                  | Change in NPA charge ( $\Delta e$ ) of hydrogen | $\Delta\sigma$ (ppm)                               | -0.0084 | -0.0004 | 0.9419 |
|                                                                                                                  | $\Delta E_{MP2}$ (kcal/mol)                     | Total charge transfer (e) between species          | -175.2  | -0.0408 | 0.9591 |
|                                                                                                                  | $\Delta E_{MP2}$ (kcal/mol)                     | electron density (au) at bond critical point       | *       | *       | *      |
| * Bond critical point analysis only calculated at the MP2/aug-cc-pVTZ level on BHandHLYP/6-31+G(d,p) geometries. |                                                 |                                                    |         |         |        |



**Table S3B. Linear regression parameters for 5-methylimidazole...acetone complexes for selected properties.**

| Level of Theory       | y-axis                                          | x-axis                                       | Slope (m) | Intercept (b) | Coefficient of determination (r <sup>2</sup> ) |
|-----------------------|-------------------------------------------------|----------------------------------------------|-----------|---------------|------------------------------------------------|
| BHandHLYP/6-31+G(d)   | $\Delta E_{\text{BHandHLYP}}$ (kcal/mol)        | O...H hydrogen bond length (Å)               | 5.5395    | -13.786       | 0.9309                                         |
|                       | $\Delta E_{\text{BHandHLYP}}$ (kcal/mol)        | C-H...O angle (degrees)                      | 0.120     | -22.01        | 0.2426                                         |
|                       | $\Delta E_{\text{BHandHLYP}}$ (kcal/mol)        | $\Delta$ C-H Bond length (Å)                 | -351.84   | -0.3739       | 0.9864                                         |
|                       | $\Delta E_{\text{BHandHLYP}}$ (kcal/mol)        | $\Delta$ C=O Bond length of acetone (Å)      | -1186.4   | -0.1659       | 0.9991                                         |
|                       | Change in NPA charge ( $\Delta e$ ) of hydrogen | $\Delta\sigma$ (ppm)                         | 0.0009    | 0.0121        | 0.2006                                         |
|                       | $\Delta E_{\text{BHandHLYP}}$ (kcal/mol)        | Total charge transfer (e) between species    | -139.1    | -0.0398       | 0.9714                                         |
|                       | $\Delta E_{\text{MP2}}$ (kcal/mol)              | electron density (au) at bond critical point | *         | *             | *                                              |
| BHandHLYP/6-31+G(d,p) | $\Delta E_{\text{BHandHLYP}}$ (kcal/mol)        | O...H hydrogen bond length (Å)               | 5.9342    | -14.705       | 0.9394                                         |
|                       | $\Delta E_{\text{BHandHLYP}}$ (kcal/mol)        | C-H...O angle (degrees)                      | 0.1697    | -31.088       | 0.3609                                         |
|                       | $\Delta E_{\text{BHandHLYP}}$ (kcal/mol)        | $\Delta$ C-H Bond length (Å)                 | -347.23   | -0.3587       | 0.9862                                         |
|                       | $\Delta E_{\text{BHandHLYP}}$ (kcal/mol)        | $\Delta$ C=O Bond length of acetone (Å)      | -1229     | -0.2232       | 0.9927                                         |
|                       | Change in NPA charge ( $\Delta e$ ) of hydrogen | $\Delta\sigma$ (ppm)                         | 0.0005    | 0.0119        | 0.1285                                         |
|                       | $\Delta E_{\text{BHandHLYP}}$ (kcal/mol)        | Total charge transfer (e) between species    | -141.82   | -0.0173       | 0.9963                                         |
|                       | $\Delta E_{\text{MP2}}$ (kcal/mol)              | electron density (au) at bond critical point | -190.66*  | -0.0101*      | 0.9706*                                        |
| M06-2X/6-31+G(d,p)    | $\Delta E_{\text{M06-2X}}$ (kcal/mol)           | O...H hydrogen bond length (Å)               | 3.5084    | -9.9743       | 0.4862                                         |
|                       | $\Delta E_{\text{M06-2X}}$ (kcal/mol)           | C-H...O angle (degrees)                      | -0.0061   | -0.9404       | 0.0231                                         |
|                       | $\Delta E_{\text{M06-2X}}$ (kcal/mol)           | $\Delta$ C-H Bond length (Å)                 | -232.97   | 1.3092        | 0.6106                                         |
|                       | $\Delta E_{\text{M06-2X}}$ (kcal/mol)           | $\Delta$ C=O Bond length of acetone (Å)      | -1004.1   | 0.6147        | 0.7883                                         |
|                       | Change in NPA charge ( $\Delta e$ ) of hydrogen | $\Delta\sigma$ (ppm)                         | -0.026    | -0.043        | 0.166                                          |
|                       | $\Delta E_{\text{M06-2X}}$ (kcal/mol)           | Total charge transfer (e) between species    | -72.073   | -1.1608       | 0.2837                                         |
|                       | $\Delta E_{\text{MP2}}$ (kcal/mol)              | electron density (au) at bond critical point | *         | *             | *                                              |

\* Bond critical point analysis only calculated at the MP2/aug-cc-pVTZ level on BHandHLYP/6-31+G(d,p) geometries.

iii. The effect of solvent dielectric on  $\Delta E_{MP2}$  of complex formation:

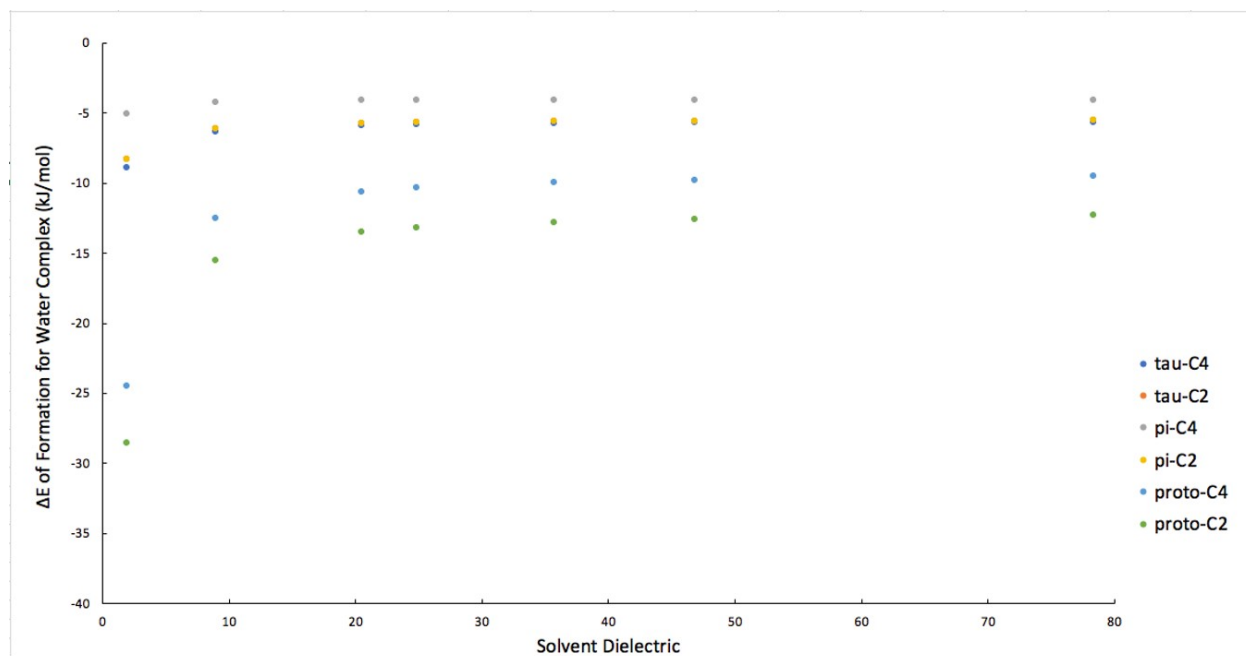

**Figure S3.**  $\Delta E_{MP2}$  vs. solvent dielectric for water complexes. Single point calculations performed at the MP2/aug-cc-pVTZ level on BHandHLYP/6-31+G(d,p) geometries. The C-PCM solvation model was used for testing different dielectrics. As solvent dielectric increases,  $\Delta E_{MP2}$  becomes more positive and  $\frac{d\Delta E_{MP2}}{d\epsilon}$  decreases.

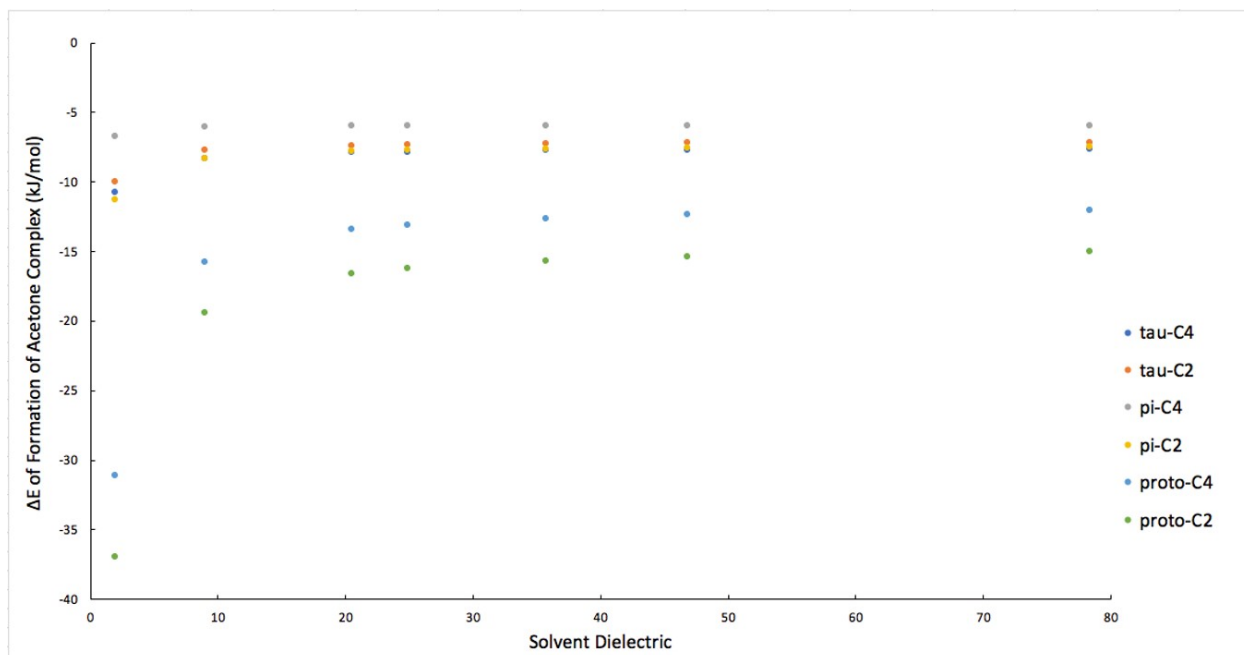

**Figure S4.**  $\Delta E_{MP2}$  vs. solvent dielectric for acetone complexes. Single point calculations performed at the MP2/aug-cc-pVTZ level on BHandHLYP/6-31+G(d,p) geometries. The C-PCM solvation model was used for  $\frac{d\Delta E_{MP2}}{d\epsilon}$

testing different dielectrics. As solvent dielectric increases,  $\Delta E_{MP2}$  becomes more positive and  $\frac{d\Delta E_{MP2}}{d\epsilon}$  decreases.

## D. Electrostatic Potential Surfaces for H-bonding Complexes.

Shown below are the electrostatic potential surfaces for water, acetone, benzene, and a selection of the species analyzed in this study. Water, acetone, and benzene surfaces were generated as an experimental control; the fact that these surfaces show the expected color patterns gives reassurance that the surfaces of interest to this work are at least qualitatively reasonable. The cube files were generated using the G09 cubegen utility. The structures below were geometrically optimized at the BHandHLYP/6-31+G(d,p) level. Single point energy calculations were then performed on these optimized geometries at the MP2/aug-cc-pVTZ level. From the checkpoint files (.chk) generated during energy calculations, formcheck files (.fchk) were created using the G09 formcheck utility using the following line in a terminal window:

```
formchk filename.chk filename.fchk
```

Next, density and potential cube (.cube) files were generated in the G09 cubegen utility using the following respective lines in a terminal window:

```
cubegen 0 density filename.fchk filename_density.cube 80  
cubegen 0 potential filename.fchk filename_potential.cube 80
```

The electrostatic potential was mapped onto the 0.002 au electron density isosurface in GaussView 5.0. The range of electrostatic potentials on the 0.002 au surface is represented by the following color bar. In terms of electrostatic potential, the left side of the bar (dark red) is most negative, and the right side (dark blue) is most positive.

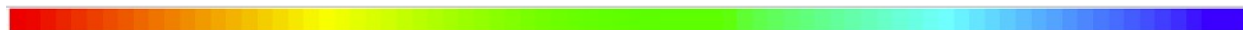

For neutral species, the range of electrostatic potentials is  $\pm 38$  kcal/mol (except benzene, for which the range is  $\pm 19$  kcal/mol) and so the green in the middle of the color scale nicely represents an electrostatic potential of zero. For species of +1 charge, it was found that all potentials on the 0.002 au surface are positive, and so the color scale ranges from +56 kcal/mol at the red end to  $+1.4 \times 10^2$  kcal/mol at the blue end. The electrostatic potential ranges selected are not arbitrary; these respective ranges for the neutral and +1 species give the most visually satisfying range of colors.

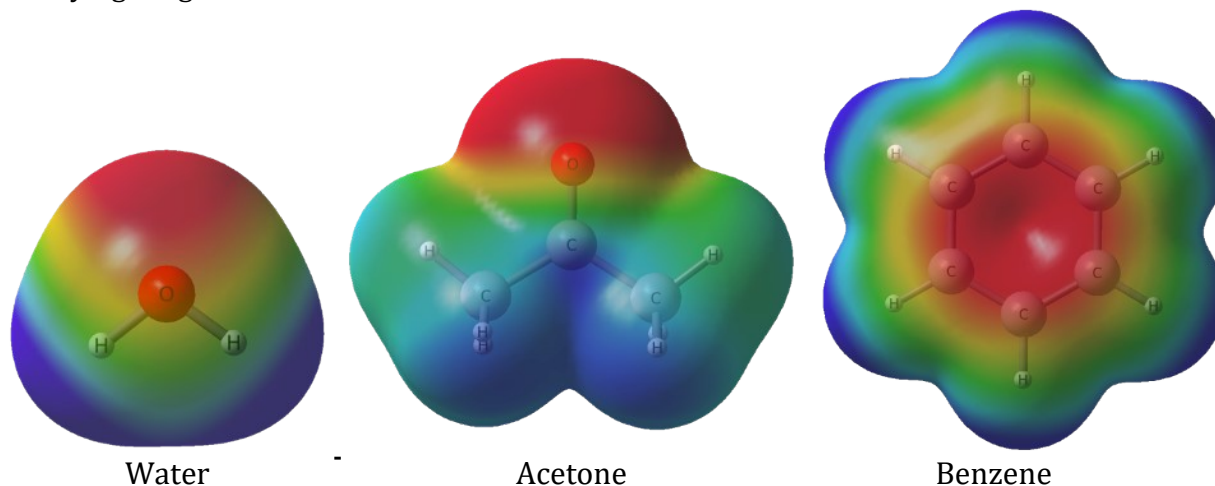

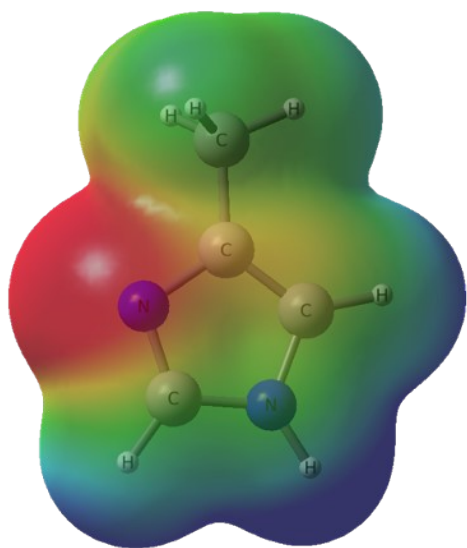

tau-5-methylimidazole

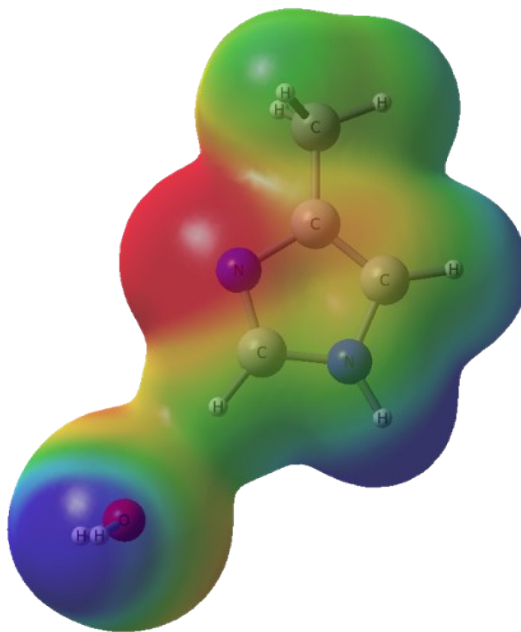

tau-5-methylimidazole/C2-H...water

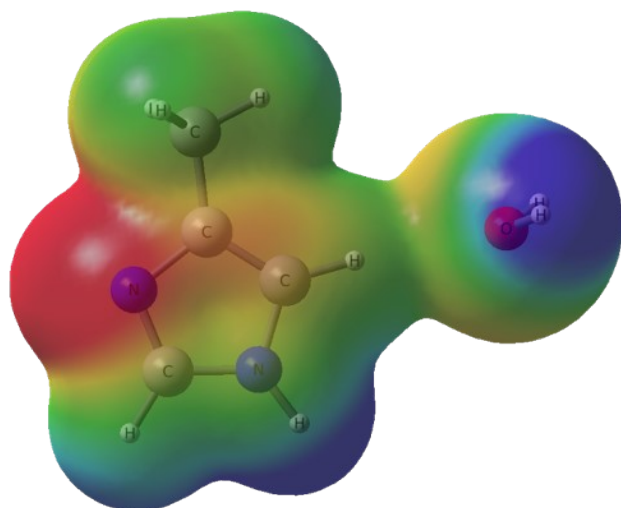

tau-5-methylimidazole/C4-H...water

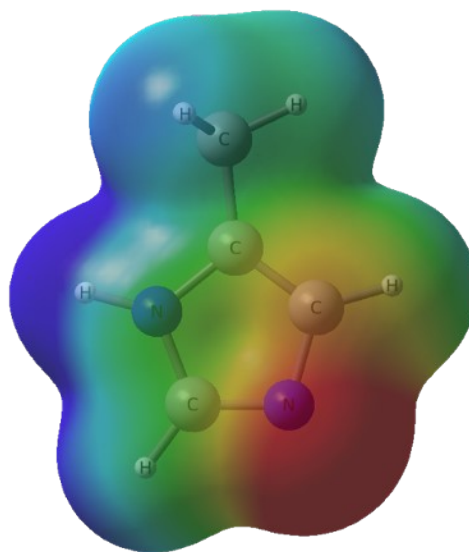

pi-5-methylimidazole

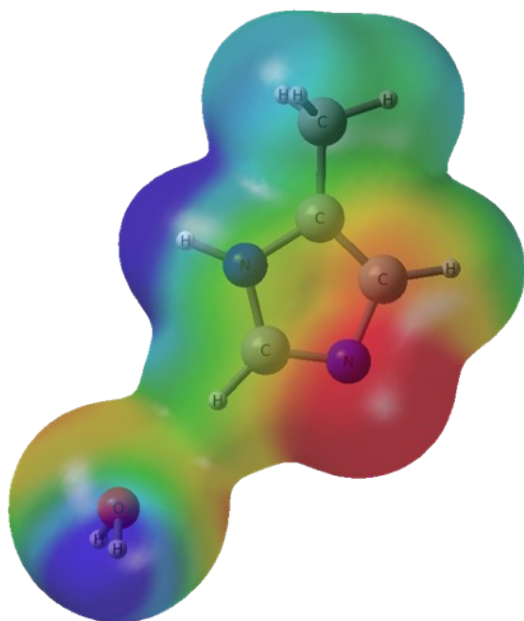

pi-5-methylimidazole/C2-H...water

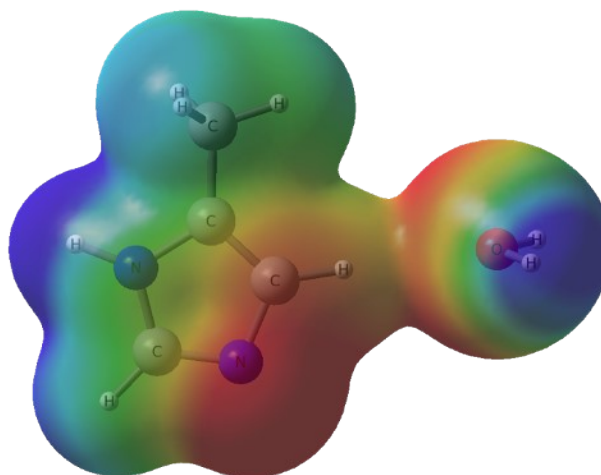

pi-5-methylimidazole/C4-H...water

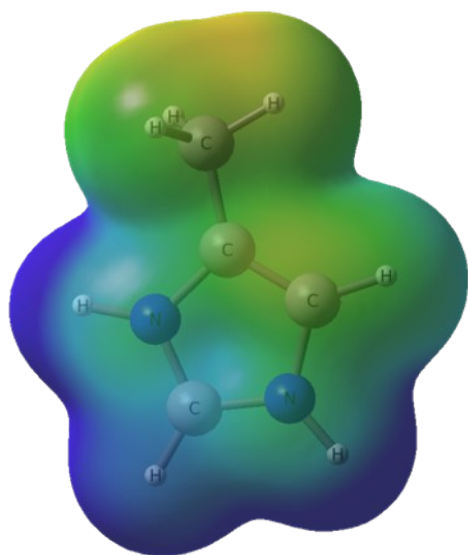

5-methylimidazolium

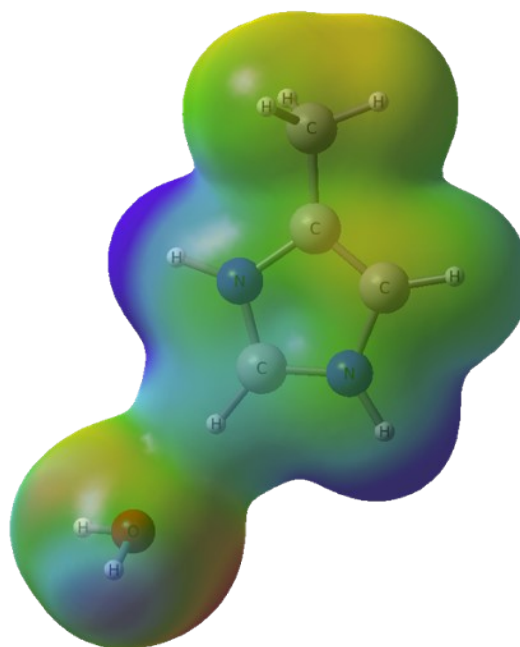

5-methylimidazolium/C2-H...water

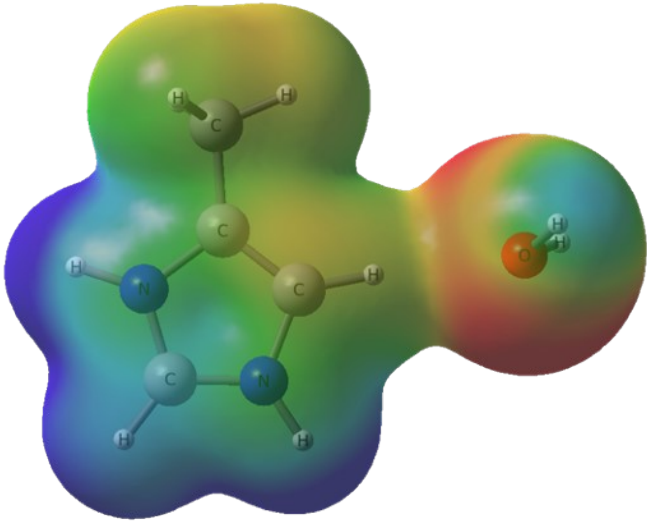

5-methylimidazolium/C4-H...water

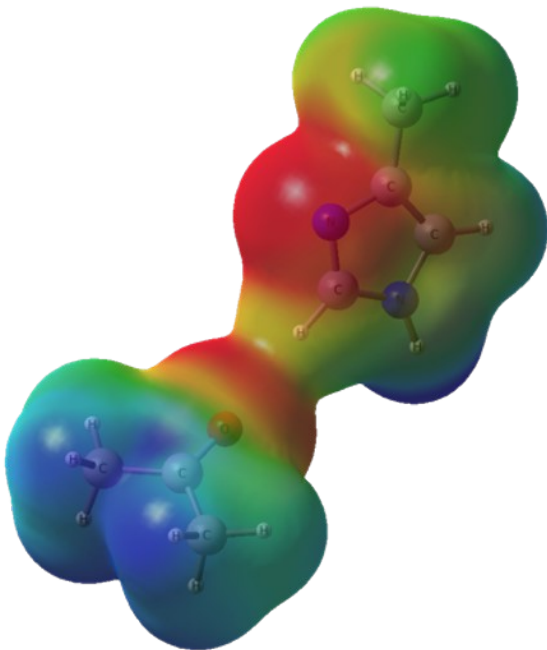

tau-5-methylimidazole/C2-H...acetone

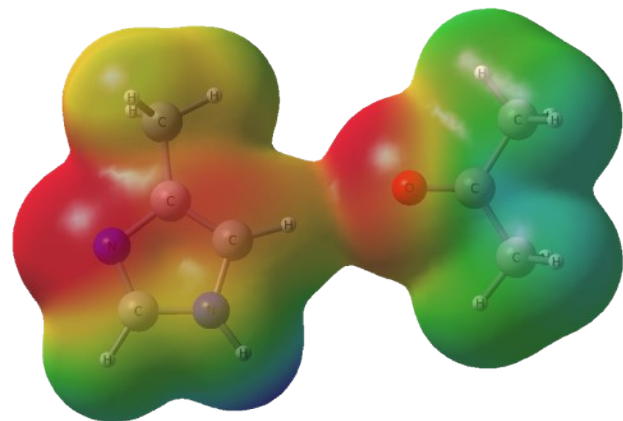

tau-5-methylimidazole/C4-H...acetone

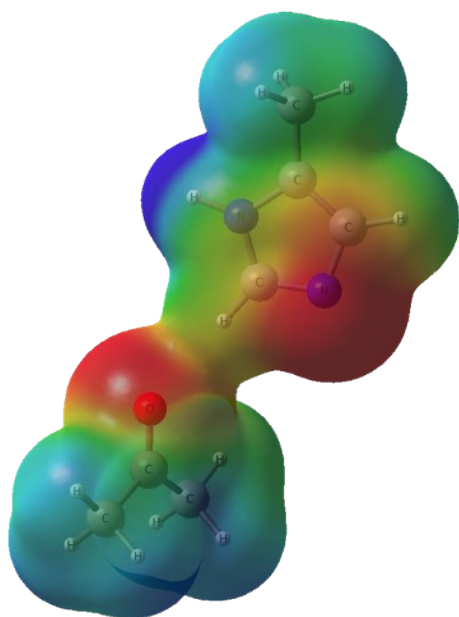

pi-5-methylimidazole/C2-H...acetone

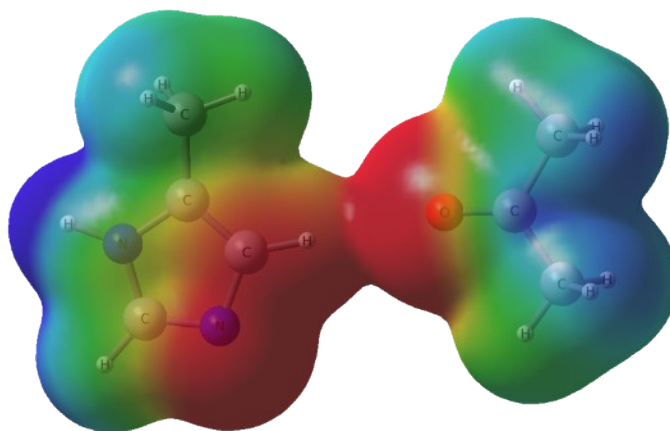

pi-5-methylimidazole/C4-H...acetone

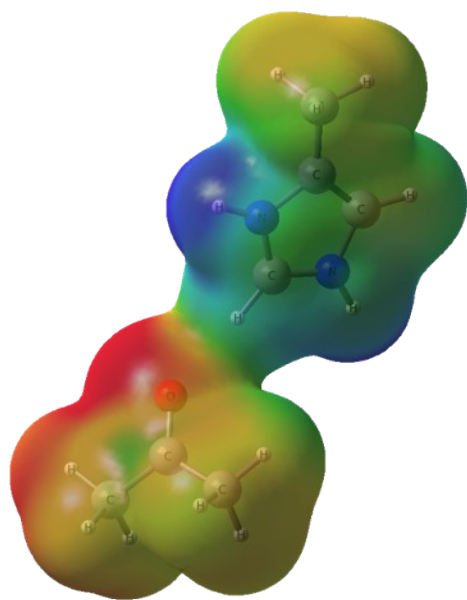

5-methylimidazolium/C2-H...acetone

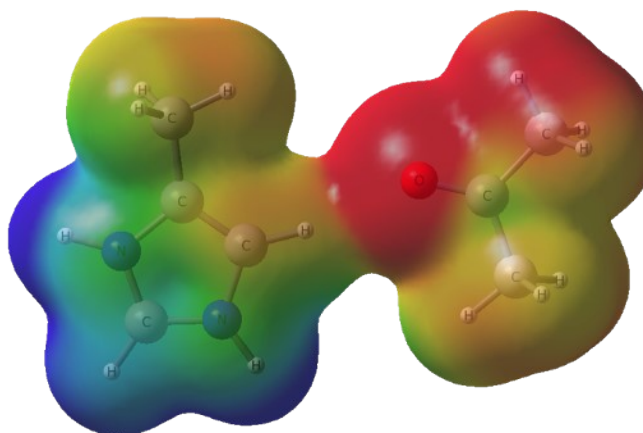

5-methylimidazolium/C4-H...acetone



**Table S4. Electrostatic potential (kcal/mol) on the 0.002 au isodensity surface for the three forms of 5-methylimidazole. For identification of the respective sites, see Figure S5.**

|                               | N1 site | C2 site | N3 site | C4 site |
|-------------------------------|---------|---------|---------|---------|
| <i>tau</i> -5-methylimidazole | -62     | 35      | 80      | 38      |
| <i>pi</i> -5-methylimidazole  | 80      | 35      | -65     | 15      |
| 5-methylimidazolium           | 173     | 149     | 172     | 122     |

It was found, for the water complexes, that a plot of  $\Delta E_{\text{complex}}$  calculated at the MP2/aug-cc-pVTZ level (Table 8a) vs. electrostatic potential at the respective acceptor position (either the C2 or C4 site) shown in Table S4 yields a line of best fit:  $y = -0.0134x - 0.812$  with a coefficient of determination of 0.982. Hence, a strong linear correlation between the electrostatic potential of the Lewis acidic acceptor site and the strength of the hydrogen bond is observed.

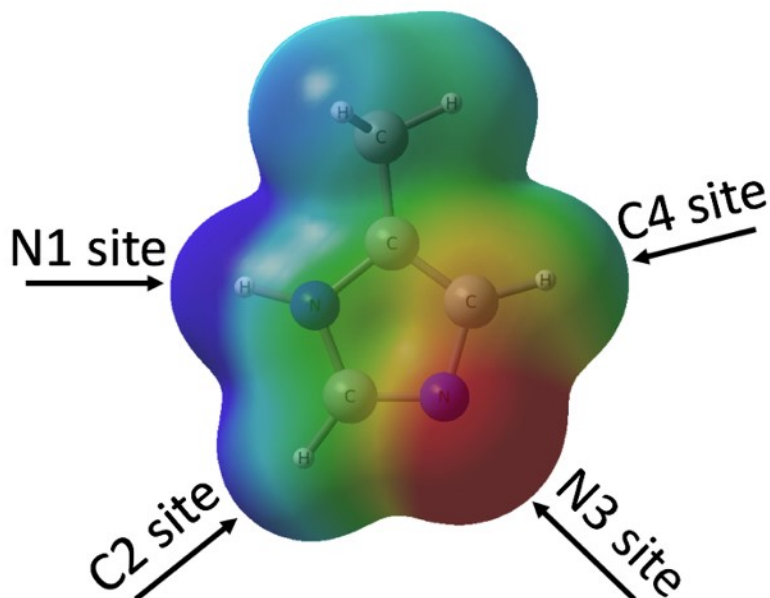

**Figure S5.** Visual presentation of the sites referred to in Table S4. The tip of each arrow indicates the approximate site on the 0.002 au isodensity surface where the electrostatic potential was recorded and entered into Table S4. *Pi*-5-methylimidazole was arbitrarily selected as an example; the sites are labeled the same for each of the three forms of 5-methylimidazole.

## E. Addressing Basis Set Superposition Error.

It is shown below in Table S5a that geometries from 6-31+G(d,p) and 6-311+G(d,p) are remarkably similar, and therefore calculations based on double-zeta basis set equilibrium geometries are quite reasonable. Coordinates for both 6-31+G(d,p) and 6-311+G(d,p) optimized geometries are given in the section below.

**Table S5a. Geometric data for the complexes. H-bond length (Å), O - - C distance (Å), C-H...O angle (degrees).**

| Complex Name                                | BHandHLYP/6-31+G(d) | BHandHLYP/6-31+G(d,p) | BHandHLYP/6-311+G(d,p) | MP2/aug-cc-pVTZ |
|---------------------------------------------|---------------------|-----------------------|------------------------|-----------------|
| <i>tau-5-methylimidazole/C4-H...water</i>   | 2.30, 3.37, 179     | 2.30, 3.37, 176       | 2.31, 3.38, 176        | 2.30, 3.37, 172 |
| <i>tau-5-methylimidazole/C2-H...water</i>   | 2.26, 3.34, 178     | 2.26, 3.34, 179       | 2.28, 3.35, 179        | 2.29, 3.37, 178 |
| <i>pi-5-methylimidazole/C4-H...water</i>    | 2.39, 3.46, 178     | 2.39, 3.47, 178       | 2.41, 3.48, 178        | 2.43, 3.46, 160 |
| <i>pi-5-methylimidazole/C2-H...water</i>    | 2.26, 3.34, 179     | 2.27, 3.34, 179       | 2.28, 3.35, 179        | 2.29, 3.37, 179 |
| <i>5-methylimidazolium/C4-H...water</i>     | 2.14, 3.21, 176     | 2.14, 3.22, 176       | 2.15, 3.22, 176        | 2.14, 3.22, 175 |
| <i>5-methylimidazolium/C2-H...water</i>     | 2.03, 3.10, 179     | 2.03, 3.11, 179       | 2.03, 3.11, 178        | 2.06, 3.14, 178 |
| <i>tau-5-methylimidazole/C4-H...acetone</i> | 2.35, 3.41, 173     | 2.34, 3.41, 178       | 2.32, 3.39, 178        | *               |
| <i>tau-5-methylimidazole/C2-H...acetone</i> | 2.31, 3.38, 174     | 2.30, 3.38, 177       | 2.30, 3.37, 176        | *               |
| <i>pi-5-methylimidazole/C4-H...acetone</i>  | 2.48, 3.56, 179     | 2.46, 3.54, 179       | 2.44, 3.51, 177        | *               |
| <i>pi-5-methylimidazole/C2-H...acetone</i>  | 2.31, 3.38, 175     | 2.30, 3.38, 176       | 2.30, 3.37, 175        | *               |
| <i>5-methylimidazolium/C4-H...acetone</i>   | 2.18, 3.24, 169     | 2.17, 3.24, 170       | 2.17, 3.23, 173        | *               |
| <i>5-methylimidazolium/C2-H...acetone</i>   | 2.05, 3.12, 173     | 2.04, 3.12, 175       | 2.04, 3.11, 177        | *               |

**Table S5b.  $\Delta$ C-H bond length (in pm) upon complex formation,  $\Delta$ H-O<sub>water</sub> (or  $\Delta$ C=O<sub>acetone</sub>) bond length (in pm) upon complex formation.**

|                                             |              |              |              |              |
|---------------------------------------------|--------------|--------------|--------------|--------------|
| <i>tau-5-methylimidazole/C4-H...water</i>   | 0.214, 0.019 | 0.202, 0.031 | 0.208, 0.035 | 0.166, 0.033 |
| <i>tau-5-methylimidazole/C2-H...water</i>   | 0.206, 0.022 | 0.200, 0.031 | 0.194, 0.038 | 0.152, 0.029 |
| <i>pi-5-methylimidazole/C4-H...water</i>    | 0.076, 0.030 | 0.097, 0.026 | 0.101, 0.028 | 0.048, 0.035 |
| <i>pi-5-methylimidazole/C2-H...water</i>    | 0.196, 0.021 | 0.195, 0.031 | 0.190, 0.036 | 0.150, 0.030 |
| <i>5-methylimidazolium/C4-H...water</i>     | 0.441, 0.041 | 0.429, 0.040 | 0.423, 0.045 | 0.381, 0.038 |
| <i>5-methylimidazolium/C2-H...water</i>     | 0.734, 0.059 | 0.713, 0.054 | 0.701, 0.061 | 0.644, 0.045 |
| <i>tau-5-methylimidazole/C4-H...acetone</i> | 0.105, 0.043 | 0.131, 0.040 | 0.142, 0.052 | *            |
| <i>tau-5-methylimidazole/C2-H...acetone</i> | 0.081, 0.051 | 0.094, 0.052 | 0.126, 0.070 | *            |
| <i>pi-5-methylimidazole/C4-H...acetone</i>  | 0.036, 0.018 | 0.047, 0.019 | 0.053, 0.027 | *            |
| <i>pi-5-methylimidazole/C2-H...acetone</i>  | 0.110, 0.053 | 0.129, 0.055 | 0.129, 0.069 | *            |
| <i>5-methylimidazolium/C4-H...acetone</i>   | 0.331, 0.123 | 0.388, 0.107 | 0.385, 0.125 | *            |
| <i>5-methylimidazolium/C2-H...acetone</i>   | 0.665, 0.211 | 0.704, 0.215 | 0.710, 0.242 | *            |

## F. Other Potential C–H⋯O Hydrogen Bonds Found in XRD Structures.

Table S6. Potential C–H⋯O Hydrogen Bonds Found in XRD Structures.<sup>1</sup>

| PDB ID | Protein Description         | Residue        | H-Bond Donor | H-Bond Acceptor                                         | O - - - C distance (Å) |
|--------|-----------------------------|----------------|--------------|---------------------------------------------------------|------------------------|
| 117E   | Inorganic pyrophosphatase   | His87 Chain A  | Cδ           | oxygen of water                                         | 3.1                    |
| 117E   | Inorganic pyrophosphatase   | His87 Chain A  | Cε           | oxygen of water                                         | 3.3                    |
| 117E   | Inorganic pyrophosphatase   | His87 Chain B  | Cδ           | oxygen of water                                         | 3.4                    |
| 117E   | Inorganic pyrophosphatase   | His87 Chain B  | Cε           | oxygen of water                                         | 3.5                    |
| 117E   | Inorganic pyrophosphatase   | His223 Chain A | Cδ           | oxygen of water                                         | 3.5                    |
| 117E   | Inorganic pyrophosphatase   | His223 Chain B | Cδ           | oxygen of water                                         | 3.6                    |
| 101M   | Sperm whale myoglobin       | His64          | Cδ           | oxygen of water                                         | 3.2                    |
| 101M   | Sperm whale myoglobin       | His64          | Cε           | oxygen of water                                         | 3.0                    |
| 101M   | Sperm whale myoglobin       | His81          | Cδ           | oxygen of water                                         | 3.0                    |
| 101M   | Sperm whale myoglobin       | His116         | Cδ           | oxygen of water                                         | 2.8                    |
| 101M   | Sperm whale myoglobin       | His116         | Cε           | oxygen of water                                         | 2.9                    |
| 11AS   | Asparagine synthetase       | His209         | Cε           | oxygen of water                                         | 3.4                    |
| 11BA   | Bovine seminal ribonuclease | His12          | Cε           | oxygen of C=O group of uridylyl-2'-5'-phospho-adenosine | 3.3                    |
| 11BA   | Bovine seminal ribonuclease | His12          | Cδ           | oxygen of water                                         | 3.1                    |
| 12CA   | Human carbonic anhydrase    | His64          | Cδ           | oxygen of water                                         | 3.0                    |
| 13PK   | Phosphoglycerate kinase     | His171         | Cε           | oxygen of water                                         | 2.9                    |
| 13PK   | Phosphoglycerate kinase     | His393         | Cε           | oxygen of water                                         | 3.5                    |
| 13PK   | Phosphoglycerate kinase     | His171 Chain B | Cε           | oxygen of water                                         | 2.9                    |
| 13PK   | Phosphoglycerate kinase     | His171 Chain B | Cε           | oxygen of water                                         | 3.1                    |

<sup>1</sup> apparent/assigned tautomeric state of histidines is τ-tautomer

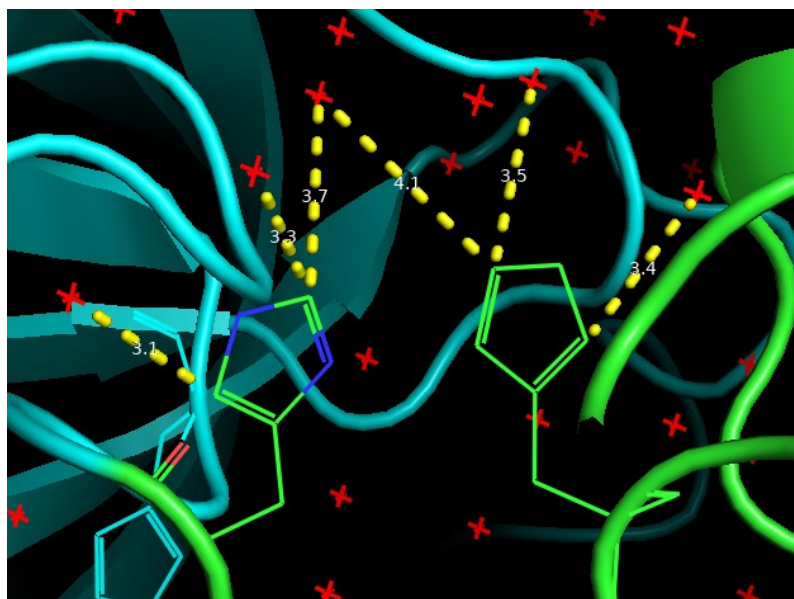

**Figure S6.** PDB ID 117E. Inorganic pyrophosphatase. His 87 Chain A, and His87 Chain B.

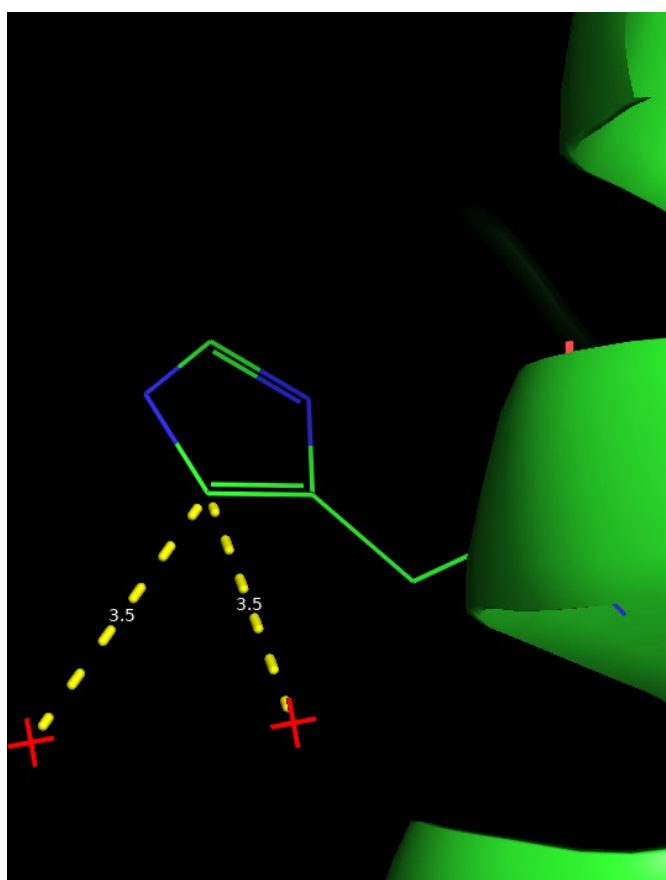

**Figure S7.** PDB ID 117E. Inorganic pyrophosphatase. His223 Chain A.

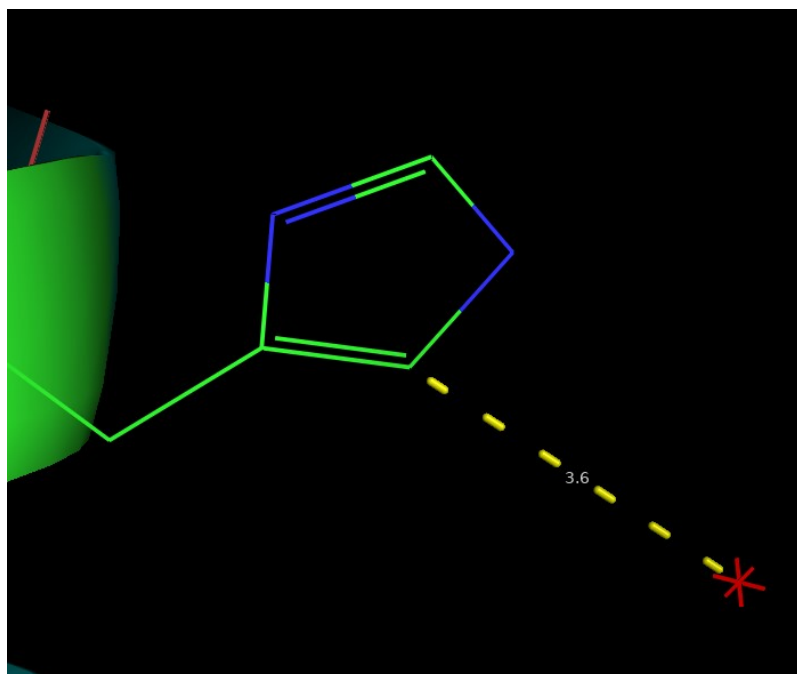

**Figure S8.** PDB ID 117E. Inorganic pyrophosphatase. His 223 Chain B.

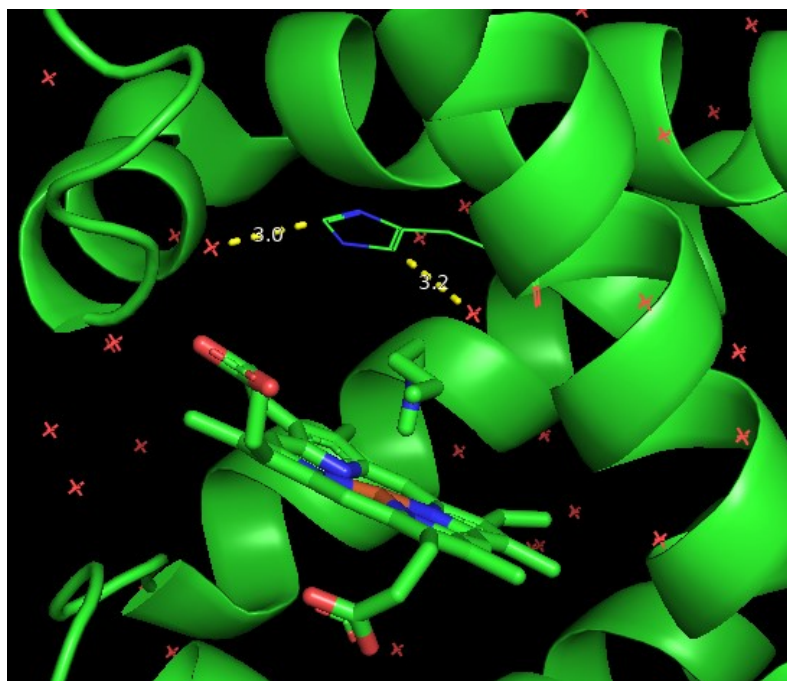

**Figure S9.** PDB ID 101M. Sperm whale myoglobin. His64.

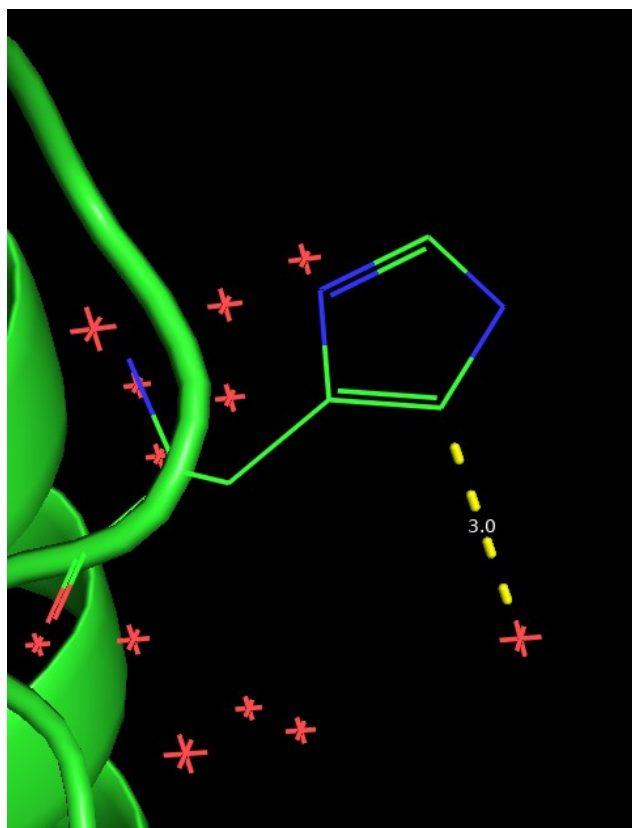

**Figure S10.** PDB ID 101M. Sperm whale myoglobin. His81.

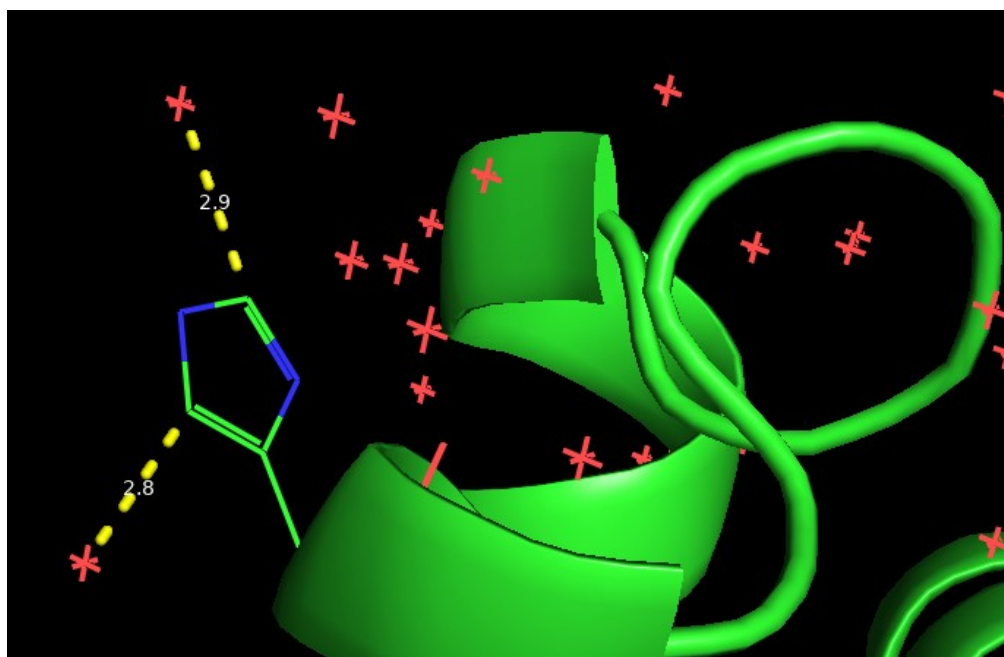

**Figure S11.** PDB ID 101M. Sperm whale myoglobin. His116.

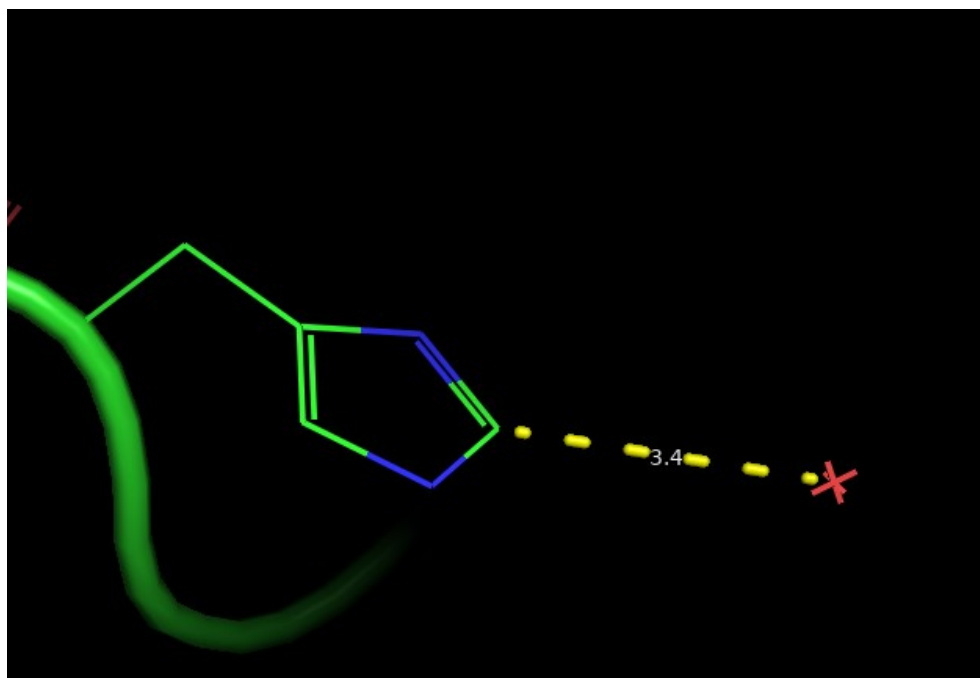

**Figure S12.** PDB ID 11AS. Asparagine synthetase. His209.

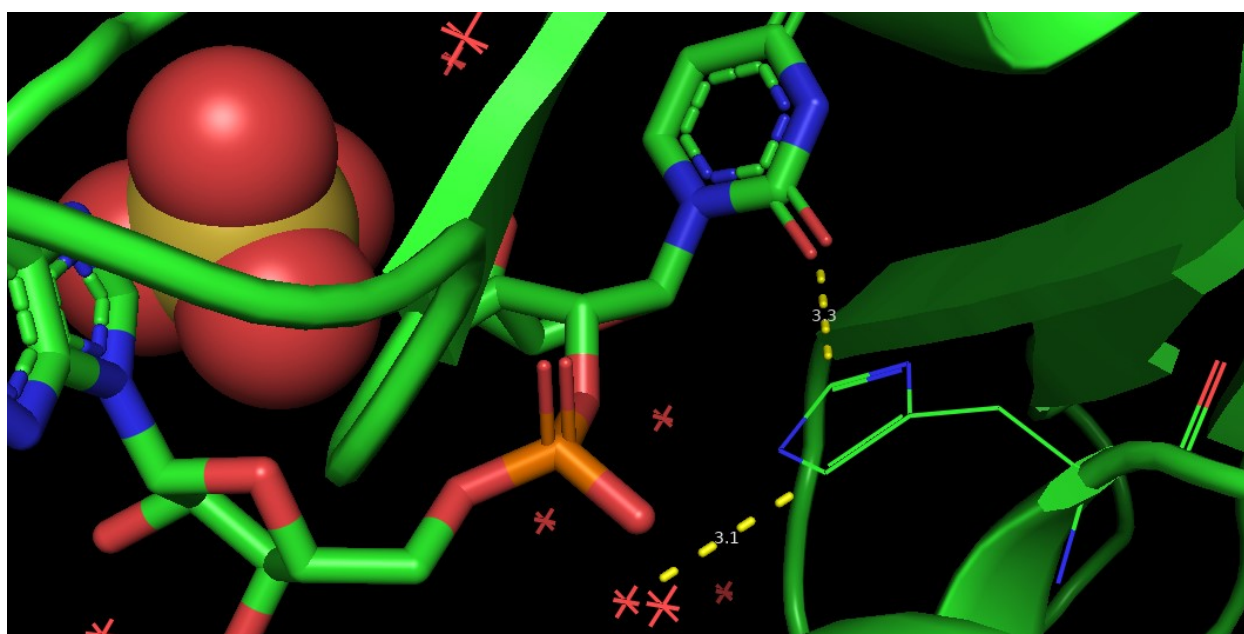

**Figure S13.** PDB ID 11BA. Bovine seminal ribonuclease. His12.

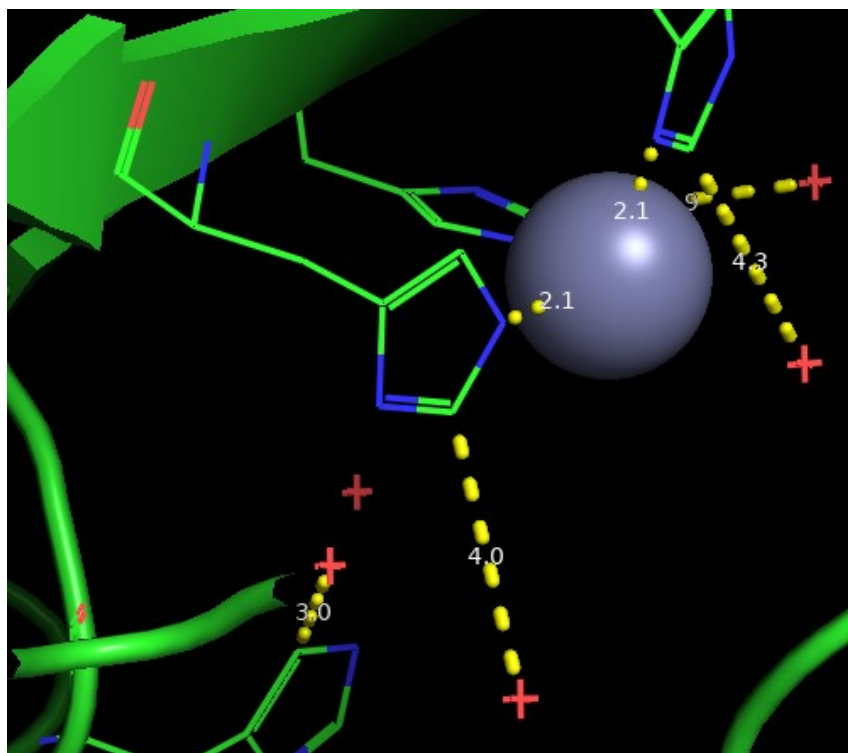

**Figure S14.** PDB ID 12CA. Human carbonic anhydrase. His64.

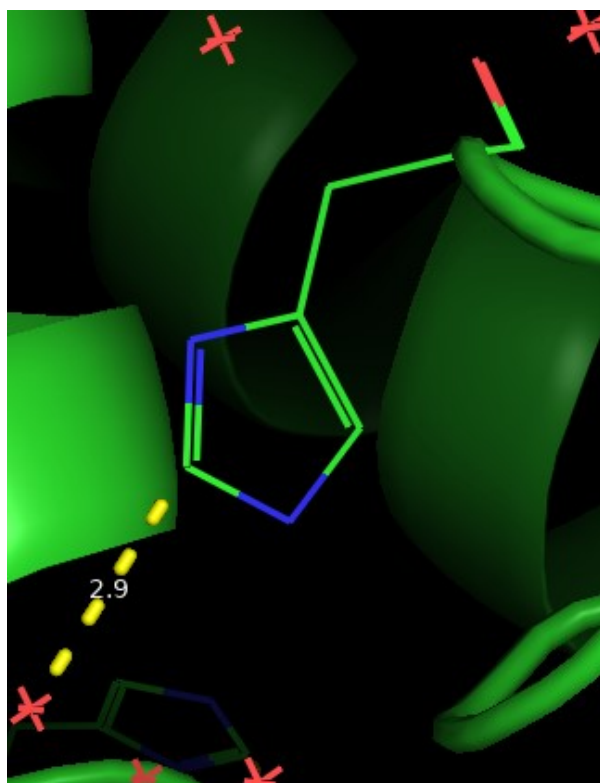

**Figure S15.** PDB ID 13PK. Phosphoglycerate kinase. His171.



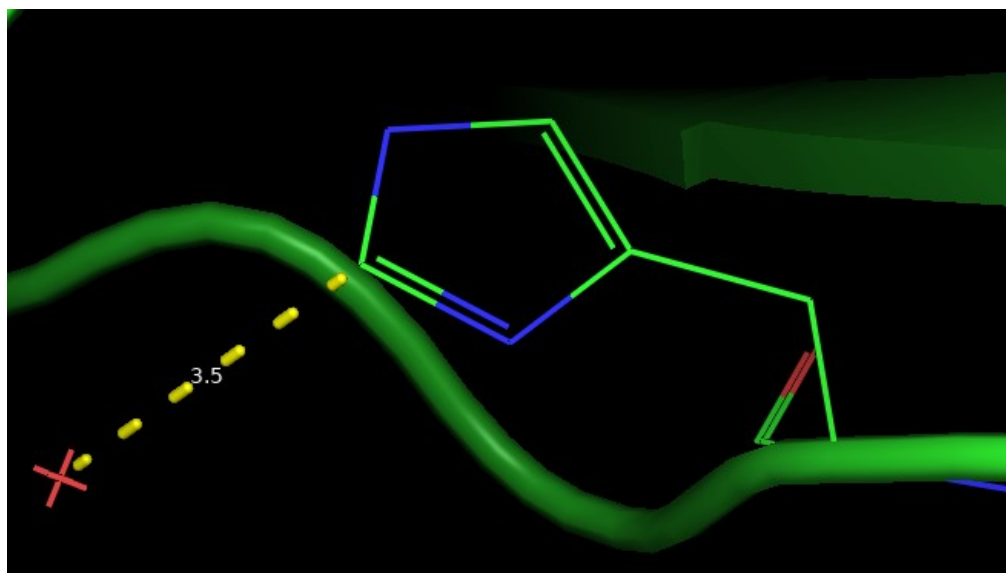

**Figure S16.** PDB ID 13PK. Phosphoglycerate kinase. His393.

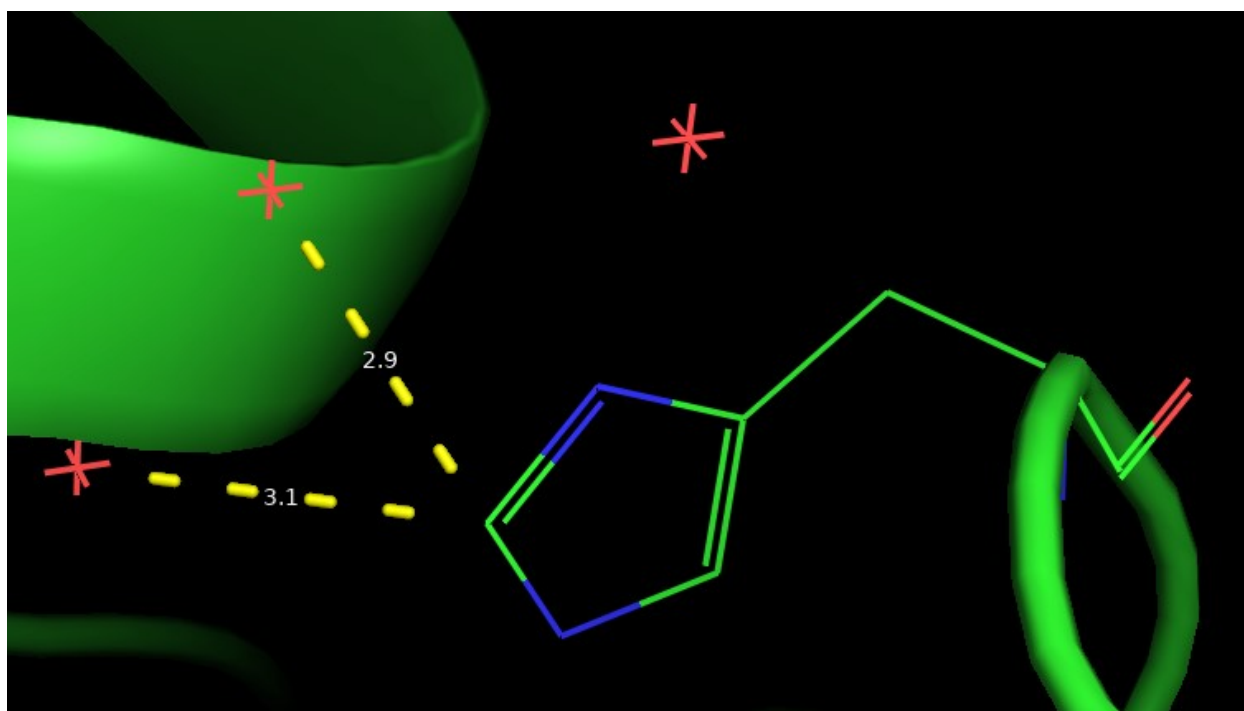

**Figure S17.** PDB ID 13PK. Phosphoglycerate kinase. His171 Chain B.

## G. Atomic Coordinates for Geometrically Optimized Complexes.

Atomic coordinates are listed in three columns corresponding to x, y, and z respectively. The atomic label is listed to the left. The term "proto" in the file naming scheme represents the presence of the imidazolium ion.

### Atomic Coordinates (x y z) for Optimized Geometries of 5-methylimidazole...water Complexes:

*BHandHLYP/6-31+G(d) Level:*

#### Water

|   |            |             |             |
|---|------------|-------------|-------------|
| O | 0.00000000 | 0.00000000  | 0.11651700  |
| H | 0.00000000 | -0.76176200 | -0.46606700 |
| H | 0.00000000 | 0.76176200  | -0.46606700 |

#### Tau-5-methylimidazole

|   |             |             |             |
|---|-------------|-------------|-------------|
| N | 0.09284700  | -1.13791300 | -0.00010200 |
| N | 1.44980300  | 0.58647200  | 0.00007600  |
| C | -0.65541600 | 0.01672900  | -0.00012400 |
| C | 0.17675500  | 1.09690200  | 0.00005500  |
| C | 1.34384800  | -0.75488600 | -0.00000800 |
| H | -0.01589600 | 2.15124200  | -0.00061800 |
| H | 2.30339900  | 1.11196300  | 0.00012500  |
| H | 2.20085900  | -1.40120000 | 0.00022200  |
| C | -2.14521700 | -0.01380000 | 0.00008400  |
| H | -2.52714300 | -0.53199500 | 0.87764800  |
| H | -2.55230500 | 0.99326800  | -0.00035500 |
| H | -2.52728800 | -0.53286200 | -0.87688500 |

#### Tau-C4 Complex

|   |             |             |             |
|---|-------------|-------------|-------------|
| N | 1.97147000  | 0.14893100  | -0.00272000 |
| N | 0.50229200  | -1.48021500 | 0.00066000  |
| C | 0.48293000  | 2.16251600  | 0.00340700  |
| C | 0.70529100  | 0.68877500  | 0.00166900  |
| C | -0.22023400 | -0.31341100 | 0.00383100  |
| C | 1.80660000  | -1.14890700 | -0.00320400 |
| H | 0.92616000  | 2.62867900  | -0.87470300 |
| H | -0.57869100 | 2.39291200  | 0.00666100  |
| H | -1.29412400 | -0.30382600 | 0.00698500  |
| H | 0.12963000  | -2.41064000 | 0.00110800  |
| O | -3.58964500 | -0.29367100 | -0.01182300 |
| H | -3.96342300 | 0.22598500  | -0.72615300 |
| H | -3.98674000 | 0.05765400  | 0.78752100  |
| H | 2.58922700  | -1.88366600 | -0.00622500 |
| H | 0.93126500  | 2.62741400  | 0.87959500  |

#### Tau-C2 Complex

|   |             |             |             |
|---|-------------|-------------|-------------|
| N | 0.26475200  | -0.83533600 | -0.00047400 |
| N | -0.05852800 | 1.33349700  | 0.00458200  |
| C | 2.76638600  | -0.96867800 | -0.00482300 |
| C | 1.48725700  | -0.20400300 | -0.00120500 |
| C | 1.30043200  | 1.14641500  | 0.00191600  |
| C | -0.63530900 | 0.11668900  | 0.00300800  |

|   |             |             |             |
|---|-------------|-------------|-------------|
| H | 2.84040700  | -1.60680400 | -0.88345900 |
| H | 3.61930200  | -0.29589000 | -0.00478500 |
| H | 1.99062700  | 1.96651100  | 0.00242700  |
| H | -0.53815800 | 2.21357000  | 0.00730200  |
| H | -1.70193500 | -0.02087800 | 0.00456900  |
| O | -3.93725800 | -0.37106700 | 0.01308600  |
| H | -4.23399700 | -0.98454000 | 0.68813400  |
| H | -4.27752600 | -0.72269400 | -0.81195000 |
| H | 2.84317800  | -1.61040600 | 0.87094900  |

#### Proto-5-methylimidazole

|   |             |             |             |
|---|-------------|-------------|-------------|
| N | -0.11717200 | -1.04821900 | 0.00016600  |
| N | -1.45018000 | 0.61095200  | -0.00003300 |
| C | 2.16353900  | 0.01554600  | -0.00003100 |
| C | 0.68077700  | 0.07872500  | -0.00000700 |
| C | -0.17495000 | 1.12826200  | 0.00001500  |
| C | -1.39430200 | -0.70584200 | -0.00015300 |
| H | 2.53018600  | -0.50530600 | -0.88055100 |
| H | 2.57140600  | 1.01966100  | -0.00005400 |
| H | 0.01013000  | 2.18227200  | 0.00001800  |
| H | -2.30228100 | 1.14426400  | 0.00041200  |
| H | -2.22976100 | -1.37583800 | -0.00013100 |
| H | 0.21110700  | -1.99895200 | 0.00001400  |
| H | 2.53029300  | -0.50536800 | 0.88042100  |

#### Proto-C4 Complex

|   |             |             |             |
|---|-------------|-------------|-------------|
| N | -1.85722900 | 0.02282700  | 0.00022900  |
| N | -0.34741400 | -1.47576100 | -0.00159500 |
| C | -0.55862000 | 2.17834000  | 0.00266400  |
| C | -0.65155200 | 0.69662000  | 0.00099200  |
| C | 0.30480900  | -0.26300200 | -0.00013200 |
| C | -1.65163800 | -1.28330900 | -0.00131900 |
| H | -1.03688500 | 2.59853200  | 0.88357800  |
| H | 0.48308700  | 2.47802800  | 0.00284900  |
| H | 1.37706600  | -0.19281700 | -0.00011600 |
| O | 3.51431300  | -0.20236400 | -0.00760900 |
| H | 3.98072500  | 0.07284700  | 0.78435300  |
| H | 3.97085500  | 0.23018400  | -0.73212200 |
| H | -2.76662900 | 0.45136900  | 0.00072700  |
| H | -2.40632100 | -2.04315000 | -0.00221600 |
| H | 0.09524700  | -2.37793000 | -0.00268100 |
| H | -1.03714200 | 2.60049900  | -0.87717200 |

#### Proto-C2 Complex

|   |             |             |             |
|---|-------------|-------------|-------------|
| N | 0.25704900  | -0.76397200 | 0.00239000  |
| N | -0.13397800 | 1.32529200  | 0.01483500  |
| C | 2.77032800  | -0.90538400 | -0.01630100 |
| C | 1.49349500  | -0.14860500 | -0.00402900 |
| C | 1.23500800  | 1.17997400  | 0.00387600  |
| C | -0.71094000 | 0.13874900  | 0.01372800  |
| H | 2.84065900  | -1.53574800 | -0.89889100 |
| H | 3.60518500  | -0.21414400 | -0.02120500 |
| H | 1.89581600  | 2.02175900  | 0.00261800  |
| H | -0.63090800 | 2.19858800  | 0.02266300  |
| H | -1.77065700 | -0.06033500 | 0.01987100  |
| O | -3.76954300 | -0.38866500 | 0.03359800  |
| H | -4.09958500 | -1.18804000 | 0.44940700  |
| H | -4.22663400 | -0.33321300 | -0.80829500 |

|   |            |             |             |
|---|------------|-------------|-------------|
| H | 0.09886400 | -1.75687800 | -0.00096500 |
| H | 2.85476700 | -1.54031500 | 0.86179500  |

Pi-5-Methylimidazole

|   |             |             |             |
|---|-------------|-------------|-------------|
| N | -0.18169600 | -1.03078100 | 0.00026800  |
| N | -1.52239500 | 0.70825600  | -0.00002800 |
| C | 2.12416900  | -0.02470000 | -0.00002700 |
| C | 0.64005300  | 0.06781600  | -0.00004900 |
| C | -0.21402800 | 1.13119400  | 0.00002000  |
| C | -1.46089600 | -0.59589500 | -0.00010800 |
| H | 2.49279300  | -0.55046300 | -0.87869400 |
| H | 2.55362700  | 0.97199100  | -0.00035500 |
| H | 0.04009900  | 2.17465300  | 0.00010000  |
| H | -2.29719700 | -1.26875900 | -0.00000800 |
| H | 0.11071900  | -1.99029300 | -0.00068300 |
| H | 2.49280400  | -0.54993700 | 0.87893900  |

Pi-C4 Complex

|   |             |             |             |
|---|-------------|-------------|-------------|
| N | 1.90864700  | 0.02488700  | -0.00942700 |
| N | 0.40785900  | -1.57705500 | 0.01221400  |
| C | 0.54745900  | 2.13878900  | -0.00141000 |
| C | 0.69153300  | 0.65859300  | 0.00173800  |
| C | -0.22313700 | -0.35359600 | 0.01507900  |
| C | 1.68521500  | -1.30757100 | -0.00258600 |
| H | 0.99925100  | 2.58407200  | -0.88584500 |
| H | -0.50462200 | 2.40513700  | 0.00791000  |
| H | -1.29468000 | -0.27178600 | 0.02646900  |
| O | -3.67799400 | -0.15350800 | 0.00220700  |
| H | -4.16704600 | -0.33714900 | -0.80237700 |
| H | -4.33865100 | -0.13802000 | 0.69758700  |
| H | 2.80771800  | 0.46905300  | -0.02030200 |
| H | 2.48385800  | -2.02482700 | -0.00895400 |
| H | 1.01616400  | 2.58947800  | 0.87142000  |

Pi-C2 Complex

|   |             |             |             |
|---|-------------|-------------|-------------|
| N | 0.29504700  | -0.74777700 | -0.00364800 |
| N | -0.13304000 | 1.40414800  | 0.00463800  |
| C | 2.80822900  | -0.87209100 | -0.00221600 |
| C | 1.51984600  | -0.12951700 | 0.00004500  |
| C | 1.22709600  | 1.20239600  | 0.00490300  |
| C | -0.66124500 | 0.20830800  | -0.00086600 |
| H | 2.90576700  | -1.50330800 | -0.88353000 |
| H | 3.63645900  | -0.17059700 | 0.00117900  |
| H | 1.91892500  | 2.02401500  | 0.00898800  |
| H | -1.71149400 | -0.02262300 | -0.00276500 |
| O | -3.93023200 | -0.47441100 | -0.01344400 |
| H | -4.44085800 | -0.04387400 | -0.70189900 |
| H | -4.40147100 | -0.28936400 | 0.80128200  |
| H | 0.13208300  | -1.73742500 | -0.00769900 |
| H | 2.90483100  | -1.51069800 | 0.87385900  |

*BHandHLYP/6-31+G(d,p) Level:*

Water

|   |            |             |             |
|---|------------|-------------|-------------|
| O | 0.00000000 | 0.00000000  | 0.11545900  |
| H | 0.00000000 | -0.76082500 | -0.46183800 |
| H | 0.00000000 | 0.76082500  | -0.46183800 |

Tau-5-methylimidazole

|   |             |             |             |
|---|-------------|-------------|-------------|
| N | 0.09264500  | -1.13781200 | -0.00002000 |
| N | 1.44957500  | 0.58668300  | 0.00011200  |
| C | -0.65543900 | 0.01648200  | 0.00007900  |
| C | 0.17653400  | 1.09690900  | -0.00002100 |
| C | 1.34388100  | -0.75464800 | -0.00005600 |
| H | -0.01805900 | 2.15028200  | -0.00009100 |
| H | 2.30221300  | 1.11128400  | -0.00037700 |
| H | 2.20060600  | -1.40066000 | 0.00003600  |
| C | -2.14476900 | -0.01386800 | -0.00000400 |
| H | -2.52538000 | -0.53153900 | 0.87745900  |
| H | -2.55095400 | 0.99267500  | -0.00118400 |
| H | -2.52521200 | -0.53338300 | -0.87648000 |

Tau-C4 Complex

|   |             |             |             |
|---|-------------|-------------|-------------|
| N | 1.98494700  | 0.05485500  | -0.01058600 |
| N | 0.41028400  | -1.47270400 | 0.00929400  |
| C | 0.63280300  | 2.16265600  | -0.00019000 |
| C | 0.75792100  | 0.67793000  | 0.00138200  |
| C | -0.23227900 | -0.26026600 | 0.01386400  |
| C | 1.73380800  | -1.22933700 | -0.00545200 |
| H | 1.09940800  | 2.59492300  | -0.88255700 |
| H | -0.41084400 | 2.46095600  | 0.00957900  |
| H | -1.30232300 | -0.17848900 | 0.02443100  |
| H | -0.02353400 | -2.37478200 | 0.01532000  |
| O | -3.59720200 | -0.16297600 | 0.00182300  |
| H | -4.10172100 | -0.04932400 | -0.80145300 |
| H | -4.18552200 | 0.08574200  | 0.71226800  |
| H | 2.46525400  | -2.01447400 | -0.01185500 |
| H | 1.11676700  | 2.59830100  | 0.87110200  |

Tau-C2 Complex

|   |             |             |             |
|---|-------------|-------------|-------------|
| N | 0.27947900  | -0.84307700 | -0.00853900 |
| N | -0.06333200 | 1.32289000  | 0.00450400  |
| C | 2.78161600  | -0.95353700 | -0.00231600 |
| C | 1.49595000  | -0.20092500 | -0.00098700 |
| C | 1.29716900  | 1.14780400  | 0.00718400  |
| C | -0.62912600 | 0.10101600  | -0.00492800 |
| H | 2.86434400  | -1.58585200 | -0.88342800 |
| H | 3.62713500  | -0.27288000 | 0.00506200  |
| H | 1.98114100  | 1.97226600  | 0.01435700  |
| H | -0.55042700 | 2.19735500  | 0.00926400  |
| H | -1.69404200 | -0.04576900 | -0.00864000 |
| O | -3.93172100 | -0.39488900 | 0.01009700  |
| H | -4.36946200 | -0.86180500 | 0.71936700  |
| H | -4.45050300 | -0.57090500 | -0.77258900 |
| H | 2.85890200  | -1.59813600 | 0.87034300  |

Proto-5-methylimidazole

|   |             |             |             |
|---|-------------|-------------|-------------|
| N | -0.11724900 | -1.04843200 | 0.00027200  |
| N | -1.44972700 | 0.61154400  | -0.00035200 |
| C | 2.16304400  | 0.01552400  | 0.00003200  |
| C | 0.68067600  | 0.07760700  | -0.00041300 |
| C | -0.17419300 | 1.12786400  | 0.00027900  |
| C | -1.39434400 | -0.70486100 | 0.00012400  |
| H | 2.52923200  | -0.50680600 | -0.87893600 |
| H | 2.56857000  | 1.01970600  | -0.00153800 |

|   |             |             |             |
|---|-------------|-------------|-------------|
| H | 0.01368400  | 2.18079600  | -0.00047700 |
| H | -2.30096300 | 1.14412700  | 0.00100000  |
| H | -2.22979300 | -1.37434300 | -0.00014900 |
| H | 0.20891800  | -1.99868900 | -0.00092400 |
| H | 2.52809000  | -0.50337700 | 0.88145600  |

Proto-C4 Complex

|   |             |             |             |
|---|-------------|-------------|-------------|
| N | -1.86139700 | 0.01813700  | -0.00191000 |
| N | -0.34611800 | -1.47519600 | 0.00387500  |
| C | -0.56994200 | 2.17711100  | -0.00336200 |
| C | -0.65839400 | 0.69578300  | -0.00089100 |
| C | 0.30153600  | -0.26017400 | 0.00280500  |
| C | -1.65071700 | -1.28711800 | 0.00098000  |
| H | -1.05008800 | 2.59697000  | 0.87582800  |
| H | 0.47042500  | 2.47849100  | -0.00323000 |
| H | 1.37268200  | -0.18409100 | 0.00446800  |
| O | 3.52115300  | -0.17558700 | 0.00688300  |
| H | 4.04302300  | 0.18089600  | 0.72343400  |
| H | 4.03685600  | -0.03353900 | -0.78480900 |
| H | -2.77156900 | 0.44235300  | -0.00441900 |
| H | -2.40237900 | -2.04948700 | 0.00089300  |
| H | 0.09855000  | -2.37510300 | 0.00635400  |
| H | -1.04901900 | 2.59401000  | -0.88453000 |

Proto-C2 Complex

|   |             |             |             |
|---|-------------|-------------|-------------|
| N | 0.26179000  | -0.76591700 | -0.00359400 |
| N | -0.13262300 | 1.32290700  | 0.01444200  |
| C | 2.77444000  | -0.90240600 | -0.01366800 |
| C | 1.49672200  | -0.14843200 | -0.00337100 |
| C | 1.23651300  | 1.17972700  | 0.00804300  |
| C | -0.70722400 | 0.13555700  | 0.00720500  |
| H | 2.84803800  | -1.52871900 | -0.89802500 |
| H | 3.60660000  | -0.20916300 | -0.01306700 |
| H | 1.89710000  | 2.02097200  | 0.01207300  |
| H | -0.63093600 | 2.19408000  | 0.02338200  |
| H | -1.76609800 | -0.06515300 | 0.00876900  |
| O | -3.77078000 | -0.39789700 | 0.02738000  |
| H | -4.15686400 | -1.13886000 | 0.49115600  |
| H | -4.29890700 | -0.27826600 | -0.75996500 |
| H | 0.10465600  | -1.75781000 | -0.01083300 |
| H | 2.85578000  | -1.53951600 | 0.86228000  |

Pi-5-Methylimidazole

|   |             |             |             |
|---|-------------|-------------|-------------|
| N | -0.18149000 | -1.03091000 | 0.00028600  |
| N | -1.52181400 | 0.70848800  | -0.00003500 |
| C | 2.12340600  | -0.02497400 | -0.00002200 |
| C | 0.63981400  | 0.06742000  | -0.00004900 |
| C | -0.21337300 | 1.13149100  | 0.00001200  |
| C | -1.46084000 | -0.59565800 | -0.00009900 |
| H | 2.49071400  | -0.55056300 | -0.87843100 |
| H | 2.55142900  | 0.97141500  | -0.00042100 |
| H | 0.04295800  | 2.17381900  | 0.00009700  |
| H | -2.29690400 | -1.26816300 | 0.00002400  |
| H | 0.11015700  | -1.98931100 | -0.00083600 |
| H | 2.49072500  | -0.54991900 | 0.87875700  |

Pi-C4 Complex

|   |             |             |             |
|---|-------------|-------------|-------------|
| N | 1.90980700  | 0.03092500  | -0.01116400 |
| N | 0.41603200  | -1.57763700 | 0.01311200  |
| C | 0.53912500  | 2.13763300  | -0.00035200 |
| C | 0.69015600  | 0.65865200  | 0.00235100  |
| C | -0.22061300 | -0.35702200 | 0.01730500  |
| C | 1.69218700  | -1.30276100 | -0.00411300 |
| H | 0.98768400  | 2.58384600  | -0.88505000 |
| H | -0.51365100 | 2.39765200  | 0.01032600  |
| H | -1.29197600 | -0.27798500 | 0.03032700  |
| O | -3.68315200 | -0.15925500 | -0.00165200 |
| H | -4.19080500 | -0.32007900 | -0.79476400 |
| H | -4.31836100 | -0.15261200 | 0.71184500  |
| H | 2.80583600  | 0.47828700  | -0.02388800 |
| H | 2.49371700  | -2.01614800 | -0.01211900 |
| H | 1.00676600  | 2.58904600  | 0.87174900  |

#### Pi-C2 Complex

|   |             |             |             |
|---|-------------|-------------|-------------|
| N | 0.29330400  | -0.74369000 | -0.00952300 |
| N | -0.11966300 | 1.41132800  | 0.00140000  |
| C | 2.80451600  | -0.88512300 | 0.00268600  |
| C | 1.52177300  | -0.13378900 | 0.00055100  |
| C | 1.23917600  | 1.20026800  | 0.00714900  |
| C | -0.65631000 | 0.21940000  | -0.00861200 |
| H | 2.90083400  | -1.51401200 | -0.87947200 |
| H | 3.63625300  | -0.18925600 | 0.01197700  |
| H | 1.93802100  | 2.01512500  | 0.01572300  |
| H | -1.70773500 | -0.00405200 | -0.01472500 |
| O | -3.93454100 | -0.44487800 | -0.00272800 |
| H | -4.51737800 | -0.20032900 | -0.71911200 |
| H | -4.45862300 | -0.36984100 | 0.79250300  |
| H | 0.12353800  | -1.73089800 | -0.01626400 |
| H | 2.89100000  | -1.52571000 | 0.87741100  |

#### Tau-N3 Complex

|   |             |             |             |
|---|-------------|-------------|-------------|
| N | 1.17886200  | 1.18585300  | 0.00482000  |
| N | -0.73030900 | 0.09354500  | -0.00418800 |
| C | 2.83133300  | -0.69633400 | 0.00089900  |
| C | 1.43979300  | -0.16377500 | -0.00032300 |
| C | 0.26131000  | -0.85203800 | -0.00596000 |
| C | -0.12763900 | 1.29457100  | 0.00235900  |
| H | 3.37845300  | -0.36312200 | 0.88000200  |
| H | 2.82843100  | -1.78189200 | -0.00254800 |
| H | 0.05002900  | -1.90253400 | -0.01085300 |
| H | -1.72781300 | -0.07700000 | -0.00632300 |
| O | -3.57444800 | -0.46288600 | -0.00521400 |
| H | -4.08197300 | -0.31709900 | 0.79136800  |
| H | -4.12388700 | -0.16367800 | -0.72770300 |
| H | -0.67863500 | 2.21565200  | 0.00514000  |
| H | 3.38233000  | -0.35756300 | -0.87364500 |

#### Pi-N1 Complex

|   |             |             |             |
|---|-------------|-------------|-------------|
| N | 0.21809000  | -0.37464700 | 0.00035300  |
| N | -1.81930800 | -1.20671500 | 0.00052100  |
| C | -0.14620100 | 2.11210000  | -0.00086800 |
| C | -0.62605000 | 0.70445200  | -0.00016100 |
| C | -1.88054300 | 0.16627600  | -0.00011700 |
| C | -0.54252500 | -1.48959800 | 0.00061800  |
| H | 0.45900000  | 2.32788700  | -0.87844900 |

|   |             |             |             |
|---|-------------|-------------|-------------|
| H | -0.99388800 | 2.78874900  | -0.00258000 |
| H | -2.81735300 | 0.69072000  | -0.00027300 |
| H | -0.11746900 | -2.47510400 | 0.00105800  |
| O | 3.11984800  | -0.25795800 | -0.00229700 |
| H | 3.60366400  | -0.59542000 | -0.75428800 |
| H | 3.60070800  | -0.54554300 | 0.77199800  |
| H | 1.23016500  | -0.34715100 | 0.00017200  |
| H | 0.45682500  | 2.32967400  | 0.87778100  |

Proto-N1 Complex

|   |             |             |             |
|---|-------------|-------------|-------------|
| N | 0.25491400  | -0.36754900 | 0.00018600  |
| N | -1.76325100 | -1.06298500 | -0.00003100 |
| C | 0.01715200  | 2.13438300  | -0.00000900 |
| C | -0.54055300 | 0.75881200  | -0.00000100 |
| C | -1.81952800 | 0.31147500  | -0.00012800 |
| C | -0.50095400 | -1.44966000 | 0.00017800  |
| H | 0.63148400  | 2.30391400  | -0.87950400 |
| H | -0.79035600 | 2.85640500  | -0.00041300 |
| H | -2.74768600 | 0.84319600  | -0.00028600 |
| H | -2.55046600 | -1.68551800 | -0.00012000 |
| H | -0.15412500 | -2.46256000 | 0.00028900  |
| O | 3.03935900  | -0.36251500 | -0.00016700 |
| H | 3.50510100  | -0.69642300 | 0.76526900  |
| H | 3.50305800  | -0.69968800 | -0.76541900 |
| H | 1.27893600  | -0.37970600 | 0.00031600  |
| H | 0.63084000  | 2.30418700  | 0.87988500  |

Proto-N3 Complex

|   |             |             |             |
|---|-------------|-------------|-------------|
| N | -1.09925700 | 1.10638400  | -0.00104400 |
| N | 0.77620400  | 0.08674900  | 0.00052700  |
| C | -2.79243200 | -0.75453700 | 0.00042000  |
| C | -1.40105600 | -0.23947300 | 0.00033800  |
| C | -0.20506400 | -0.87616700 | 0.00136300  |
| C | 0.21471400  | 1.27673500  | -0.00093200 |
| H | -3.33207400 | -0.41822800 | -0.88022200 |
| H | -2.77898400 | -1.83762300 | 0.00150600  |
| H | 0.02497200  | -1.92100000 | 0.00253600  |
| O | 3.52234600  | -0.33826800 | -0.00276400 |
| H | 3.92408200  | -0.76901800 | -0.75596200 |
| H | 3.93716500  | -0.71137000 | 0.77374400  |
| H | -1.76717300 | 1.85608800  | -0.00204900 |
| H | 0.72465600  | 2.21813100  | -0.00183500 |
| H | 1.78564500  | -0.08565400 | 0.00085500  |
| H | -3.33265800 | -0.41645900 | 0.88002600  |

*BHandHLYP/6-311+G(d,p) Level:*

Water

|   |            |             |             |
|---|------------|-------------|-------------|
| O | 0.00000000 | 0.00000000  | 0.11583400  |
| H | 0.00000000 | -0.75610900 | -0.46333600 |
| H | 0.00000000 | 0.75610900  | -0.46333600 |

Tau-5-methylimidazole

|   |             |             |             |
|---|-------------|-------------|-------------|
| N | 0.09482800  | -1.13606100 | 0.00004100  |
| N | 1.44737500  | 0.58682200  | -0.00002900 |
| C | -0.65455900 | 0.01647400  | -0.00004000 |
| C | 0.17417700  | 1.09512100  | -0.00003300 |
| C | 1.34250300  | -0.75325500 | 0.00005900  |



|   |             |             |             |
|---|-------------|-------------|-------------|
| H | -0.02112800 | 2.14691500  | 0.00026700  |
| H | 2.29845700  | 1.11188200  | -0.00002800 |
| H | 2.19947900  | -1.39734100 | -0.00019300 |
| C | -2.14227100 | -0.01492400 | -0.00003000 |
| H | -2.52124800 | -0.53368600 | 0.87622700  |
| H | -2.54872100 | 0.99029400  | 0.00000600  |
| H | -2.52136400 | -0.53388800 | -0.87610600 |

Tau-C4 Complex

|   |             |             |             |
|---|-------------|-------------|-------------|
| N | 1.98367600  | 0.06599300  | 0.00412700  |
| N | 0.42481300  | -1.47206700 | -0.00519000 |
| C | 0.61476000  | 2.16101400  | 0.00292000  |
| C | 0.75239700  | 0.67886500  | 0.00052200  |
| C | -0.22742300 | -0.26544300 | -0.00527200 |
| C | 1.74476400  | -1.21704000 | 0.00060700  |
| H | 1.08991500  | 2.59947400  | -0.87046800 |
| H | -0.43031400 | 2.45027600  | -0.00067300 |
| H | -1.29683700 | -0.19338000 | -0.00909100 |
| H | -0.00118600 | -2.37670000 | -0.00842900 |
| O | -3.60585000 | -0.18948700 | -0.00683000 |
| H | -4.13490500 | 0.17163500  | -0.71216900 |
| H | -4.11130600 | -0.03799400 | 0.78650500  |
| H | 2.48205500  | -1.99535800 | 0.00201400  |
| H | 1.08296700  | 2.59608300  | 0.88173800  |

Tau-C2 Complex

|   |             |             |             |
|---|-------------|-------------|-------------|
| N | -0.29411300 | -0.85158300 | 0.00746400  |
| N | 0.07637600  | 1.30580400  | -0.01437600 |
| C | -2.79604800 | -0.92855000 | 0.01296800  |
| C | -1.50158100 | -0.19423700 | 0.00339400  |
| C | -1.28565200 | 1.14842400  | -0.01004600 |
| C | 0.62481100  | 0.07762000  | -0.00344200 |
| H | -2.88197100 | -1.55694500 | 0.89526000  |
| H | -3.63148200 | -0.23727400 | 0.00804600  |
| H | -1.95754800 | 1.98092300  | -0.01674600 |
| H | 0.57401400  | 2.17302100  | -0.02403300 |
| H | 1.68692100  | -0.08153100 | -0.00376900 |
| O | 3.94152800  | -0.39186700 | -0.02638300 |
| H | 4.33657300  | -1.12481000 | -0.48968100 |
| H | 4.50171600  | -0.24394700 | 0.73000500  |
| H | -2.88545200 | -1.57360100 | -0.85687500 |

Proto-5-methylimidazole

|   |             |             |             |
|---|-------------|-------------|-------------|
| N | -0.11899200 | -1.04773600 | -0.00007600 |
| N | -1.44739800 | 0.61148900  | -0.00006000 |
| C | 2.16014100  | 0.01451600  | 0.00017600  |
| C | 0.67980900  | 0.07770100  | -0.00011200 |
| C | -0.17146100 | 1.12628600  | -0.00016100 |
| C | -1.39316300 | -0.70270300 | 0.00014300  |
| H | 2.52446400  | -0.50659000 | -0.87903600 |
| H | 2.56663400  | 1.01713700  | 0.00015800  |
| H | 0.01684900  | 2.17766700  | -0.00050500 |
| H | -2.29709600 | 1.14457200  | 0.00098500  |
| H | -2.22850800 | -1.37024800 | 0.00031300  |
| H | 0.20636300  | -1.99720100 | -0.00092000 |
| H | 2.52407100  | -0.50640800 | 0.87968200  |

Proto-C4 Complex

|   |             |             |             |
|---|-------------|-------------|-------------|
| N | -1.86098600 | 0.01982400  | 0.00254000  |
| N | -0.35014500 | -1.47378900 | -0.00290000 |
| C | -0.56519100 | 2.17455800  | 0.00041100  |
| C | -0.65683000 | 0.69525400  | -0.00046600 |
| C | 0.29908500  | -0.25975600 | -0.00396000 |
| C | -1.65202600 | -1.28349700 | 0.00101900  |
| H | -1.04118600 | 2.59201600  | 0.88173700  |
| H | 0.47464300  | 2.47386500  | -0.00300400 |
| H | 1.36887100  | -0.18586800 | -0.00689400 |
| O | 3.51884100  | -0.17289700 | -0.00178100 |
| H | 4.03663600  | 0.01723000  | 0.77522500  |
| H | 4.06599800  | 0.08289000  | -0.73879200 |
| H | -2.76951800 | 0.44517700  | 0.00540500  |
| H | -2.40394100 | -2.04378200 | 0.00272000  |
| H | 0.09279400  | -2.37340800 | -0.00478600 |
| H | -1.04734400 | 2.59345800  | -0.87687100 |

#### Proto-C2 Complex

|   |             |             |             |
|---|-------------|-------------|-------------|
| N | 0.26405900  | -0.76757100 | -0.00545300 |
| N | -0.13486800 | 1.31745500  | 0.01425500  |
| C | 2.77573600  | -0.89550600 | -0.01263500 |
| C | 1.49712000  | -0.14663600 | -0.00304700 |
| C | 1.23443700  | 1.17742900  | 0.00941500  |
| C | -0.70511200 | 0.13061400  | 0.00507200  |
| H | 2.85109400  | -1.52043800 | -0.89658500 |
| H | 3.60513100  | -0.20065300 | -0.01045000 |
| H | 1.89189400  | 2.01922900  | 0.01514400  |
| H | -0.63457600 | 2.18662600  | 0.02354500  |
| H | -1.76218100 | -0.07201700 | 0.00543300  |
| O | -3.76584800 | -0.40126800 | 0.02229200  |
| H | -4.18474400 | -1.09860700 | 0.51884600  |
| H | -4.32405700 | -0.25687000 | -0.73654100 |
| H | 0.10988200  | -1.75886300 | -0.01407700 |
| H | 2.85691000  | -1.53286400 | 0.86189700  |

#### Pi-5-Methylimidazole

|   |             |             |             |
|---|-------------|-------------|-------------|
| N | -0.18305500 | -1.02989000 | 0.00014800  |
| N | -1.51859000 | 0.70793800  | -0.00005500 |
| C | 2.12080200  | -0.02616400 | 0.00005100  |
| C | 0.63882800  | 0.06704300  | -0.00007700 |
| C | -0.21060600 | 1.12991900  | -0.00004300 |
| C | -1.46055100 | -0.59258200 | 0.00006800  |
| H | 2.48650600  | -0.55214500 | -0.87748400 |
| H | 2.54961600  | 0.96865300  | -0.00032900 |
| H | 0.04715300  | 2.17054600  | 0.00000000  |
| H | -2.29645000 | -1.26372700 | 0.00024700  |
| H | 0.10743500  | -1.98751900 | -0.00112600 |
| H | 2.48641300  | -0.55144000 | 0.87804500  |

#### Pi-C4 Complex

|   |             |             |             |
|---|-------------|-------------|-------------|
| N | -1.90885500 | 0.06299800  | -0.01012500 |
| N | -0.45714100 | -1.57845200 | 0.00550500  |
| C | -0.48704100 | 2.13330300  | 0.00902600  |
| C | -0.67479200 | 0.66013800  | 0.00534800  |
| C | 0.20921700  | -0.37465000 | 0.01484000  |
| C | -1.72287900 | -1.27439200 | -0.00931600 |
| H | -0.94351700 | 2.59105000  | 0.88242300  |
| H | 0.57068700  | 2.36705800  | 0.02052200  |

|   |             |             |             |
|---|-------------|-------------|-------------|
| H | 1.28086900  | -0.32071200 | 0.02706700  |
| O | 3.68998300  | -0.25072200 | -0.01236900 |
| H | 4.27466600  | -0.17648800 | 0.73618000  |
| H | 4.17106100  | 0.12921200  | -0.74166500 |
| H | -2.79282500 | 0.53164200  | -0.01985200 |
| H | -2.54096100 | -1.96716500 | -0.01992100 |
| H | -0.92490000 | 2.59295800  | -0.87285700 |

Pi-C2 Complex

|   |             |             |             |
|---|-------------|-------------|-------------|
| N | 0.29538300  | -0.74403400 | -0.00786600 |
| N | -0.11853800 | 1.40685900  | 0.00177000  |
| C | 2.80488900  | -0.88174100 | 0.00174900  |
| C | 1.52244700  | -0.13294800 | 0.00040400  |
| C | 1.23993600  | 1.19773500  | 0.00621600  |
| C | -0.65349400 | 0.21823100  | -0.00670500 |
| H | 2.89961100  | -1.51076800 | -0.87919700 |
| H | 3.63519200  | -0.18590000 | 0.00953100  |
| H | 1.93747700  | 2.01198400  | 0.01343300  |
| H | -1.70365000 | -0.00624000 | -0.01166500 |
| O | -3.94074100 | -0.44567400 | -0.00360300 |
| H | -4.51535100 | -0.18723000 | -0.71835500 |
| H | -4.46668500 | -0.35247600 | 0.78538600  |
| H | 0.12698200  | -1.73039400 | -0.01371900 |
| H | 2.89176400  | -1.52101800 | 0.87609600  |

*M06-2X/6-31+G(d,p) Level:*

Water

|   |            |             |             |
|---|------------|-------------|-------------|
| O | 0.00000000 | 0.00000000  | 0.11703100  |
| H | 0.00000000 | -0.76586700 | -0.46812500 |
| H | 0.00000000 | 0.76586700  | -0.46812500 |

Tau-5-methylimidazole

|   |             |             |             |
|---|-------------|-------------|-------------|
| N | 0.08826100  | -1.14484800 | 0.00054200  |
| N | 1.45548600  | 0.58915500  | 0.00038500  |
| C | -0.65806400 | 0.01605400  | 0.00026900  |
| C | 0.17998300  | 1.10372600  | -0.00003700 |
| C | 1.34863900  | -0.76084700 | -0.00056700 |
| H | -0.01402800 | 2.16491300  | 0.00107800  |
| H | 2.31609600  | 1.11759300  | -0.00201000 |
| H | 2.21279500  | -1.40956800 | -0.00033000 |
| C | -2.15318200 | -0.01194800 | -0.00021900 |
| H | -2.53378100 | -0.54024800 | 0.87904500  |
| H | -2.55850300 | 1.00233100  | 0.00679400  |
| H | -2.53306600 | -0.52708000 | -0.88773500 |

Tau-C4 Complex

|   |             |             |             |
|---|-------------|-------------|-------------|
| N | 1.95209800  | 0.29085800  | -0.00287400 |
| N | 0.64222100  | -1.48645100 | 0.00189300  |
| C | 0.26054600  | 2.14933700  | 0.00080700  |
| C | 0.63372200  | 0.70090500  | 0.00095800  |
| C | -0.19542800 | -0.39423100 | 0.00401500  |
| C | 1.91589700  | -1.02645800 | -0.00221000 |
| H | 0.64840900  | 2.65438100  | -0.88918400 |
| H | -0.82564800 | 2.26601200  | 0.01423500  |
| H | -1.27309000 | -0.48399500 | 0.00708700  |
| H | 0.36155700  | -2.45660000 | 0.00315500  |

|   |             |             |             |
|---|-------------|-------------|-------------|
| O | -3.50589300 | -0.34054800 | -0.00094600 |
| H | -4.06847400 | -0.21789800 | -0.77417100 |
| H | -4.08672600 | -0.21864100 | 0.75881000  |
| H | 2.77128800  | -1.68681200 | -0.00428500 |
| H | 0.67116500  | 2.65976200  | 0.87736100  |

Tau-C2 Complex

|   |             |             |             |
|---|-------------|-------------|-------------|
| N | 0.29996400  | -0.86855000 | 0.00574600  |
| N | -0.09833300 | 1.30154600  | 0.00888900  |
| C | 2.81219300  | -0.91368800 | -0.01048300 |
| C | 1.50261500  | -0.19134700 | -0.00199400 |
| C | 1.27027700  | 1.16157000  | -0.00021000 |
| C | -0.63868400 | 0.05881000  | 0.01208900  |
| H | 2.89933900  | -1.55412500 | -0.89346600 |
| H | 3.64391000  | -0.20568200 | -0.01775900 |
| H | 1.93707500  | 2.00965500  | -0.00434300 |
| H | -0.61062000 | 2.17172700  | 0.01239600  |
| H | -1.70855200 | -0.11104300 | 0.01842300  |
| O | -3.91908700 | -0.38468800 | 0.00551300  |
| H | -4.41155500 | -0.86090200 | 0.68390900  |
| H | -4.39923100 | -0.54379100 | -0.81524500 |
| H | 2.91251100  | -1.55137900 | 0.87312600  |

Proto-5-methylimidazole

|   |             |             |             |
|---|-------------|-------------|-------------|
| N | -0.11404300 | -1.05248200 | -0.00002200 |
| N | -1.45524000 | 0.61373300  | -0.00008300 |
| C | 2.17170200  | 0.01665600  | -0.00001100 |
| C | 0.68429700  | 0.07818200  | 0.00012600  |
| C | -0.17825400 | 1.13479800  | -0.00003100 |
| C | -1.40052600 | -0.71188900 | 0.00004300  |
| H | 2.53663300  | -0.50619500 | -0.88730500 |
| H | 2.57579300  | 1.02888500  | 0.00034000  |
| H | 0.00926200  | 2.19563400  | 0.00013500  |
| H | -2.31486900 | 1.14986700  | 0.00008200  |
| H | -2.24157000 | -1.38647500 | 0.00014800  |
| H | 0.21956300  | -2.01002500 | -0.00018300 |
| H | 2.53685800  | -0.50693300 | 0.88674600  |

Proto-C4 Complex

|   |             |             |             |
|---|-------------|-------------|-------------|
| N | -1.85996500 | 0.08432500  | 0.00162600  |
| N | -0.41240500 | -1.48861700 | -0.00336900 |
| C | -0.46271500 | 2.18421100  | 0.00322500  |
| C | -0.62230000 | 0.70370000  | 0.00152500  |
| C | 0.29729200  | -0.30444000 | 0.00055700  |
| C | -1.71574500 | -1.23874800 | -0.00132500 |
| H | -0.94550000 | 2.62615000  | 0.87828300  |
| H | 0.59838200  | 2.43309100  | 0.02849000  |
| H | 1.37923300  | -0.27906200 | -0.00042800 |
| O | 3.50020500  | -0.22906400 | -0.00239100 |
| H | 4.06977500  | -0.08892000 | 0.76270900  |
| H | 3.99871900  | 0.10557500  | -0.75667400 |
| H | -2.75499300 | 0.55992100  | 0.00006400  |
| H | -2.50907700 | -1.96922400 | -0.00236800 |
| H | -0.00794300 | -2.41716100 | -0.00743600 |
| H | -0.90284000 | 2.62384200  | -0.89521000 |

Proto-C2 Complex

|   |             |             |             |
|---|-------------|-------------|-------------|
| N | 0.26298700  | -0.76875100 | -0.00216300 |
| N | -0.13278200 | 1.33006000  | 0.01468800  |
| C | 2.78243700  | -0.90880500 | -0.01452400 |
| C | 1.50134500  | -0.15010300 | -0.00377700 |
| C | 1.23992600  | 1.18783700  | 0.00700900  |
| C | -0.71425500 | 0.13603800  | 0.00899800  |
| H | 2.85093500  | -1.53937900 | -0.90429800 |
| H | 3.61876000  | -0.20990800 | -0.01685700 |
| H | 1.90516400  | 2.03518600  | 0.00960300  |
| H | -0.63499200 | 2.20940400  | 0.02411100  |
| H | -1.78140400 | -0.06581700 | 0.01159000  |
| O | -3.78071600 | -0.39681500 | 0.03077100  |
| H | -4.14877400 | -1.17287400 | 0.46911700  |
| H | -4.30044500 | -0.28468000 | -0.77367900 |
| H | 0.10669000  | -1.77007300 | -0.00912900 |
| H | 2.86163800  | -1.54630100 | 0.86946100  |

#### Pi-5-Methylimidazole

|   |             |             |             |
|---|-------------|-------------|-------------|
| N | -0.17797200 | -1.03543800 | 0.00009600  |
| N | -1.53080500 | 0.71145300  | -0.00004100 |
| C | 2.13267900  | -0.02314000 | -0.00002700 |
| C | 0.64349200  | 0.06850400  | 0.00005400  |
| C | -0.21866300 | 1.13744000  | -0.00000100 |
| C | -1.46637600 | -0.60205500 | -0.00003300 |
| H | 2.49994800  | -0.55020900 | -0.88558600 |
| H | 2.55906100  | 0.98153400  | 0.00059700  |
| H | 0.03996300  | 2.18732400  | 0.00006400  |
| H | -2.30547300 | -1.28287000 | 0.00007100  |
| H | 0.12117500  | -2.00107100 | -0.00035400 |
| H | 2.49996600  | -0.55131300 | 0.88486200  |

#### Pi-C4 Complex

|   |             |             |             |
|---|-------------|-------------|-------------|
| N | 1.83766000  | 0.37665700  | -0.00528400 |
| N | 0.82538200  | -1.58742800 | -0.00116500 |
| C | -0.06016600 | 2.04036100  | 0.01346500  |
| C | 0.48986700  | 0.65329900  | 0.00627200  |
| C | -0.11794100 | -0.57849200 | 0.00867900  |
| C | 1.98888300  | -0.97449100 | -0.00932600 |
| H | 0.25393100  | 2.60099000  | -0.87204000 |
| H | -1.15081400 | 1.99595500  | 0.02001500  |
| H | -1.18160800 | -0.77896200 | 0.01754700  |
| O | -3.50238400 | -0.44180900 | 0.00959100  |
| H | -3.95020800 | -0.17356800 | -0.80101200 |
| H | -4.20819900 | -0.68423100 | 0.61985700  |
| H | 2.58535800  | 1.05670200  | -0.01000900 |
| H | 2.96071900  | -1.44724900 | -0.01859900 |
| H | 0.26473900  | 2.59617100  | 0.89813000  |

#### Pi-C2 Complex

|   |             |             |             |
|---|-------------|-------------|-------------|
| N | 0.28263500  | -0.74199600 | -0.00521000 |
| N | -0.12094400 | 1.42862800  | 0.00336800  |
| C | 2.80100700  | -0.89975000 | -0.00062000 |
| C | 1.51844900  | -0.13706700 | 0.00003400  |
| C | 1.24098800  | 1.20756400  | 0.00523000  |
| C | -0.66826900 | 0.23096200  | -0.00297200 |
| H | 2.88857300  | -1.53320300 | -0.88842400 |
| H | 3.64008000  | -0.20188700 | 0.00439400  |
| H | 1.95158700  | 2.02265100  | 0.01042200  |

|   |             |             |             |
|---|-------------|-------------|-------------|
| H | -1.72841600 | 0.00842300  | -0.00562200 |
| O | -3.91398000 | -0.46535500 | -0.00670000 |
| H | -4.47544300 | -0.15878600 | -0.72796500 |
| H | -4.44201500 | -0.35227400 | 0.79188600  |
| H | 0.10788300  | -1.73747400 | -0.00995100 |
| H | 2.88470500  | -1.54128300 | 0.88172500  |

*MP2/6-31+G(d) Level:*

Water

|   |            |             |             |
|---|------------|-------------|-------------|
| O | 0.00000000 | 0.00000000  | 0.11901200  |
| H | 0.00000000 | -0.76995200 | -0.47604700 |
| H | 0.00000000 | 0.76995200  | -0.47604700 |

Tau-5-methylimidazole

|   |             |             |             |
|---|-------------|-------------|-------------|
| N | -0.08212400 | -1.15233300 | 0.00000000  |
| N | -1.45831600 | 0.59194200  | -0.00009200 |
| C | 2.15808000  | -0.01012500 | 0.00004500  |
| C | 0.66356400  | 0.01424400  | -0.00003700 |
| C | -0.18285900 | 1.10864300  | 0.00005100  |
| C | -1.35854600 | -0.76490000 | -0.00003200 |
| H | 2.54247500  | -0.52860200 | -0.88441500 |
| H | 2.55661800  | 1.00870000  | -0.00001300 |
| H | 0.00585400  | 2.17357900  | -0.00051800 |
| H | -2.32251100 | 1.12577000  | 0.00087700  |
| H | -2.22325300 | -1.41537800 | -0.00003600 |
| H | 2.54246100  | -0.52850200 | 0.88458400  |

Tau-C4 Complex

|   |             |             |             |
|---|-------------|-------------|-------------|
| N | 1.99408500  | 0.10171700  | -0.01483000 |
| N | 0.44374400  | -1.48905200 | -0.00391300 |
| C | 0.56781600  | 2.17233600  | 0.00101200  |
| C | 0.73905900  | 0.68717100  | -0.00338900 |
| C | -0.23836000 | -0.29267100 | 0.00363500  |
| C | 1.77623100  | -1.21463500 | -0.01482400 |
| H | 1.02636500  | 2.62458000  | -0.88462100 |
| H | -0.49470700 | 2.43324500  | 0.00685900  |
| H | -1.32021400 | -0.24690300 | 0.01299600  |
| H | 0.02623500  | -2.41499700 | -0.00156200 |
| O | -3.56451000 | -0.18976500 | 0.05857700  |
| H | -4.20445000 | -0.20184200 | -0.67587800 |
| H | -4.11536000 | -0.11741900 | 0.85879300  |
| H | 2.53424800  | -1.98691000 | -0.02246400 |
| H | 1.03501800  | 2.62058400  | 0.88417700  |

Tau-C2 Complex

|   |             |             |             |
|---|-------------|-------------|-------------|
| N | 0.29890400  | -0.87012300 | 0.01116000  |
| N | -0.08157800 | 1.31690800  | -0.00185100 |
| C | 2.81359100  | -0.93108500 | -0.00154100 |
| C | 1.51010800  | -0.19937500 | 0.00038600  |
| C | 1.28613500  | 1.16571800  | -0.00779100 |
| C | -0.64320200 | 0.07658900  | 0.00943800  |
| H | 2.90166800  | -1.57561900 | -0.88237900 |
| H | 3.64871700  | -0.22433900 | -0.01018800 |
| H | 1.95861700  | 2.01279800  | -0.01701600 |
| H | -0.58627000 | 2.19832500  | -0.00557800 |
| H | -1.71439800 | -0.08407500 | 0.01567400  |
| O | -3.92696500 | -0.43315400 | -0.00059700 |

|   |             |             |             |
|---|-------------|-------------|-------------|
| H | -4.56207100 | -0.45654100 | 0.73764400  |
| H | -4.46218600 | -0.63938100 | -0.78788200 |
| H | 2.91056700  | -1.56451600 | 0.88638400  |

Proto-5-methylimidazole

|   |             |             |             |
|---|-------------|-------------|-------------|
| N | -0.10903700 | -1.05352200 | -0.00018000 |
| N | -1.45751200 | 0.61656800  | 0.00011000  |
| C | 2.17628300  | 0.01901900  | 0.00023200  |
| C | 0.68845300  | 0.07489100  | -0.00047300 |
| C | -0.18452900 | 1.13938900  | 0.00000300  |
| C | -1.40690800 | -0.71996800 | 0.00018300  |
| H | 2.54689600  | -0.50078100 | -0.88750600 |
| H | 2.57468000  | 1.03528500  | 0.00096600  |
| H | 0.00007900  | 2.20311800  | -0.00072000 |
| H | -2.32160300 | 1.15506900  | 0.00029500  |
| H | -2.24744400 | -1.39708700 | 0.00016000  |
| H | 0.22763400  | -2.01526900 | -0.00029200 |
| H | 2.54580700  | -0.50164100 | 0.88791800  |

Proto-C4 Complex

|   |             |             |             |
|---|-------------|-------------|-------------|
| N | 1.86638500  | 0.03161600  | 0.00271500  |
| N | 0.34928800  | -1.48518900 | -0.00346900 |
| C | 0.55706500  | 2.18888900  | 0.00063900  |
| C | 0.65885800  | 0.70305200  | -0.00054300 |
| C | -0.30976800 | -0.27597900 | -0.00457800 |
| C | 1.67353200  | -1.29480500 | 0.00093600  |
| H | 1.03725000  | 2.61428300  | -0.88499500 |
| H | -0.49598800 | 2.47689100  | -0.00254500 |
| H | -1.39071300 | -0.20897700 | -0.00755800 |
| O | -3.51064200 | -0.11718600 | -0.00035400 |
| H | -4.12811600 | -0.12466900 | -0.75400400 |
| H | -4.08166800 | -0.19777100 | 0.78491000  |
| H | 2.78498600  | 0.47128500  | 0.00599000  |
| H | 2.43695500  | -2.05784000 | 0.00287600  |
| H | -0.09680500 | -2.40007200 | -0.00559700 |
| H | 1.03140700  | 2.61242900  | 0.89029900  |

Proto-C2 Complex

|   |             |             |             |
|---|-------------|-------------|-------------|
| N | 0.26967900  | -0.77026700 | 0.00013200  |
| N | -0.12295200 | 1.33662300  | -0.00003800 |
| C | 2.79006700  | -0.91602000 | 0.00003300  |
| C | 1.50846400  | -0.15782700 | 0.00000400  |
| C | 1.24617100  | 1.19316600  | -0.00012300 |
| C | -0.71751100 | 0.13738900  | 0.00007300  |
| H | 2.86764700  | -1.55024600 | -0.88742600 |
| H | 3.62549900  | -0.21334000 | -0.00025300 |
| H | 1.91368400  | 2.04173400  | -0.00020700 |
| H | -0.62521700 | 2.22179400  | -0.00026800 |
| H | -1.78437400 | -0.06219600 | 0.00021100  |
| O | -3.80600800 | -0.38430700 | -0.00019500 |
| H | -4.25984100 | -0.76855800 | 0.77139300  |
| H | -4.25791300 | -0.77339200 | -0.77049000 |
| H | 0.11046900  | -1.77628000 | 0.00023000  |
| H | 2.86787700  | -1.54980000 | 0.88779200  |

Pi-5-Methylimidazole

|   |             |             |             |
|---|-------------|-------------|-------------|
| N | -0.17343300 | -1.03735100 | -0.00033800 |
|---|-------------|-------------|-------------|

|   |             |             |             |
|---|-------------|-------------|-------------|
| N | -1.53956700 | 0.71682600  | -0.00010700 |
| C | 2.13809500  | -0.02085600 | -0.00016800 |
| C | 0.64885000  | 0.06889500  | 0.00042700  |
| C | -0.22375900 | 1.14273700  | 0.00012300  |
| C | -1.46969100 | -0.61427300 | 0.00003500  |
| H | 2.50790200  | -0.54786900 | -0.88577800 |
| H | 2.56068100  | 0.98714100  | -0.00192000 |
| H | 0.02911200  | 2.19613600  | 0.00025400  |
| H | -2.30810200 | -1.29831100 | -0.00048000 |
| H | 0.13135000  | -2.00718800 | 0.00200900  |
| H | 2.50909200  | -0.54524500 | 0.88652700  |

Pi-C4 Complex

|   |             |             |             |
|---|-------------|-------------|-------------|
| N | 1.90738400  | 0.05975700  | 0.00607000  |
| N | 0.42636600  | -1.59787200 | -0.00455300 |
| C | 0.49369500  | 2.15062400  | -0.00354600 |
| C | 0.67104200  | 0.66910500  | -0.00308200 |
| C | -0.23221500 | -0.37961100 | -0.00944100 |
| C | 1.72358000  | -1.29138500 | 0.00516300  |
| H | 0.95252000  | 2.61050400  | -0.88508200 |
| H | -0.57365200 | 2.38606800  | -0.01300100 |
| H | -1.31416500 | -0.32115600 | -0.01693600 |
| O | -3.64341800 | -0.19932000 | 0.00021300  |
| H | -4.27828700 | -0.22538300 | -0.73816800 |
| H | -4.20128200 | -0.13141600 | 0.79584100  |
| H | 2.54690400  | -1.99361500 | 0.01134600  |
| H | 0.93654400  | 2.60914400  | 0.88683300  |
| H | 2.80590600  | 0.53481900  | 0.01228000  |

Pi-C2 Complex

|   |             |             |             |
|---|-------------|-------------|-------------|
| N | 0.28890200  | -0.74387600 | 0.00875100  |
| N | -0.11370100 | 1.44076200  | -0.00147200 |
| C | 2.80938900  | -0.90907700 | -0.00197800 |
| C | 1.52909700  | -0.14289200 | -0.00030100 |
| C | 1.25035500  | 1.21239200  | -0.00638300 |
| C | -0.66959700 | 0.22760200  | 0.00770700  |
| H | 2.89232700  | -1.55099600 | -0.88519000 |
| H | 3.64945800  | -0.20982200 | -0.00886500 |
| H | 1.96097600  | 2.03021200  | -0.01414300 |
| H | -1.73021400 | 0.00785200  | 0.01348200  |
| O | -3.93420400 | -0.40689700 | 0.00079400  |
| H | -4.48093100 | -0.54050100 | -0.79422000 |
| H | -4.57291700 | -0.40034200 | 0.73624500  |
| H | 0.11335000  | -1.74512700 | 0.01444900  |
| H | 2.89970500  | -1.54244700 | 0.88666200  |

*MP2/aug-cc-pVTZ Level:*

Water

|   |            |             |             |
|---|------------|-------------|-------------|
| O | 0.00000000 | 0.00000000  | 0.11908400  |
| H | 0.00000000 | 0.75692900  | -0.47633500 |
| H | 0.00000000 | -0.75692900 | -0.47633500 |

Tau-5-methylimidazole

|   |             |             |             |
|---|-------------|-------------|-------------|
| N | -0.08397000 | -1.14826700 | 0.00007600  |
| N | -1.45285200 | 0.59098400  | 0.00003800  |
| C | 2.15153000  | -0.00978500 | -0.00002800 |



|   |             |             |             |
|---|-------------|-------------|-------------|
| C | 0.66145800  | 0.01199200  | -0.00002300 |
| C | -0.18163300 | 1.10378200  | -0.00004200 |
| C | -1.35452300 | -0.76069500 | -0.00006200 |
| H | 2.53324500  | -0.52684000 | -0.88027000 |
| H | 2.54860800  | 1.00379300  | -0.00016500 |
| H | 0.00934300  | 2.16247000  | -0.00026600 |
| H | -2.31023100 | 1.12127200  | 0.00057100  |
| H | -2.21744600 | -1.40487500 | -0.00009100 |
| H | 2.53324500  | -0.52660100 | 0.88035500  |

Tau-C4 Complex

|   |             |             |             |
|---|-------------|-------------|-------------|
| N | 1.96968800  | 0.27472200  | 0.00864100  |
| N | 0.62919100  | -1.48702100 | -0.00454100 |
| C | 0.30225300  | 2.14977300  | -0.00520200 |
| C | 0.65875000  | 0.70258500  | -0.00293000 |
| C | -0.18902300 | -0.38665100 | -0.01120200 |
| C | 1.91333400  | -1.05260500 | 0.00731900  |
| H | 0.71303200  | 2.65173800  | -0.88133600 |
| H | -0.77919600 | 2.27522000  | -0.01528000 |
| H | -1.26370500 | -0.46319600 | -0.02029300 |
| H | 0.33191800  | -2.45040400 | -0.00749700 |
| O | -3.55698800 | -0.29859700 | 0.00026600  |
| H | -4.19846600 | -0.33325400 | -0.71765400 |
| H | -4.10169600 | -0.20793400 | 0.78966800  |
| H | 2.75351500  | -1.72632800 | 0.01439800  |
| H | 0.69646900  | 2.65041600  | 0.87925900  |

Tau-C2 Complex

|   |             |             |             |
|---|-------------|-------------|-------------|
| N | -0.30120100 | -0.86374000 | -0.01537000 |
| N | 0.06353000  | 1.31826200  | 0.00069900  |
| C | -2.80973200 | -0.93771700 | 0.00391500  |
| C | -1.51215000 | -0.20469200 | -0.00008200 |
| C | -1.29742400 | 1.15809300  | 0.00992400  |
| C | 0.62974200  | 0.08570100  | -0.01447200 |
| H | -2.89099000 | -1.58199000 | 0.87943200  |
| H | -3.64360300 | -0.23792900 | 0.01645800  |
| H | -1.97415100 | 1.99445300  | 0.02242200  |
| H | 0.55976700  | 2.19580800  | 0.00437400  |
| H | 1.69755600  | -0.06456200 | -0.02357100 |
| O | 3.95920200  | -0.42977700 | 0.00333100  |
| H | 4.59521700  | -0.45698800 | -0.71970000 |
| H | 4.48855700  | -0.63351700 | 0.78196600  |
| H | -2.90488700 | -1.56701500 | -0.88104000 |

Proto-5-methylimidazole

|   |             |             |             |
|---|-------------|-------------|-------------|
| N | -0.10882700 | -1.05025700 | -0.00004000 |
| N | -1.45257600 | 0.61453900  | -0.00014700 |
| C | 2.16836300  | 0.01979300  | 0.00014700  |
| C | 0.68580600  | 0.07364700  | -0.00005600 |
| C | -0.18395100 | 1.13498700  | 0.00009500  |
| C | -1.40060700 | -0.71617000 | -0.00002100 |
| H | 2.53452400  | -0.49977100 | -0.88354300 |
| H | 2.56531700  | 1.03097700  | 0.00043300  |
| H | 0.00234900  | 2.19263000  | -0.00001000 |
| H | -2.31127500 | 1.14758700  | -0.00017200 |
| H | -2.23727200 | -1.38950600 | -0.00007400 |
| H | 0.22434000  | -2.00530000 | -0.00007800 |
| H | 2.53416800  | -0.50013300 | 0.88377000  |

Proto-C4 Complex

|   |             |             |             |
|---|-------------|-------------|-------------|
| N | 1.85512000  | 0.13722200  | 0.00808600  |
| N | 0.46992700  | -1.49208700 | -0.00784000 |
| C | 0.37965600  | 2.17386400  | -0.00124700 |
| C | 0.60242200  | 0.70693700  | -0.00209900 |
| C | -0.28142400 | -0.34372900 | -0.01228300 |
| C | 1.76805000  | -1.19439700 | 0.00455200  |
| H | 0.82704900  | 2.63255900  | -0.88144400 |
| H | -0.68814800 | 2.37446300  | -0.00776200 |
| H | -1.35905900 | -0.35525800 | -0.02148300 |
| O | -3.49321800 | -0.19971400 | 0.00340500  |
| H | -4.11203800 | -0.24782200 | -0.73345800 |
| H | -4.04784100 | -0.32734200 | 0.78076600  |
| H | 2.73038700  | 0.64354600  | 0.01717100  |
| H | 2.58646000  | -1.88981700 | 0.01068700  |
| H | 0.10552100  | -2.43446100 | -0.01293100 |
| H | 0.81585500  | 2.62984900  | 0.88594700  |

Proto-C2 Complex

|   |             |             |             |
|---|-------------|-------------|-------------|
| N | 0.27150000  | -0.76970400 | 0.00481700  |
| N | -0.12173100 | 1.33036700  | -0.00422300 |
| C | 2.78444900  | -0.90914000 | 0.00272600  |
| C | 1.50483800  | -0.15823700 | 0.00091100  |
| C | 1.24249900  | 1.18821500  | -0.00494500 |
| C | -0.71075400 | 0.13481800  | 0.00170400  |
| H | 2.85949300  | -1.54436400 | -0.87824300 |
| H | 3.61416300  | -0.20784400 | -0.00112800 |
| H | 1.90831100  | 2.03090100  | -0.00951700 |
| H | -0.62300400 | 2.20758300  | -0.00760500 |
| H | -1.77265500 | -0.06423300 | 0.00386100  |
| O | -3.80343700 | -0.38107800 | -0.01126700 |
| H | -4.28212100 | -0.63182200 | 0.78643000  |
| H | -4.22592500 | -0.89478100 | -0.70837200 |
| H | 0.11321200  | -1.76840000 | 0.00938400  |
| H | 2.86144700  | -1.53698900 | 0.88880000  |

Pi-5-Methylimidazole

|   |             |             |             |
|---|-------------|-------------|-------------|
| N | -0.17365800 | -1.03390700 | -0.00020300 |
| N | -1.53346800 | 0.71464700  | -0.00008700 |
| C | 2.13043700  | -0.02083400 | -0.00004600 |
| C | 0.64598300  | 0.06717500  | 0.00007400  |
| C | -0.22249100 | 1.13907700  | -0.00018500 |
| C | -1.46447800 | -0.61087300 | 0.00039500  |
| H | 2.49751900  | -0.54627400 | -0.88156700 |
| H | 2.55178500  | 0.98194000  | -0.00124300 |
| H | 0.03535100  | 2.18557300  | -0.00041300 |
| H | -2.29785600 | -1.29284200 | 0.00048200  |
| H | 0.12845600  | -1.99655200 | 0.00085100  |
| H | 2.49792000  | -0.54430500 | 0.88248800  |

Pi-C4 Complex

|   |             |             |             |
|---|-------------|-------------|-------------|
| N | 1.84406300  | 0.39013100  | 0.00937100  |
| N | 0.85339100  | -1.59152500 | -0.00614600 |
| C | -0.06758200 | 2.02876100  | -0.00710800 |
| C | 0.49696100  | 0.65287200  | -0.00450300 |
| C | -0.09728400 | -0.59282300 | -0.01365500 |

|   |             |             |             |
|---|-------------|-------------|-------------|
| C | 2.01928600  | -0.95732100 | 0.00778800  |
| H | 0.25323300  | 2.58984200  | -0.88495700 |
| H | -1.15389400 | 1.97114100  | -0.01756000 |
| H | -1.15478800 | -0.80311300 | -0.02523500 |
| O | -3.55589700 | -0.43836500 | 0.00081000  |
| H | -4.20500100 | -0.49684200 | -0.70869400 |
| H | -4.09478600 | -0.38368800 | 0.79750400  |
| H | 2.99422100  | -1.41472200 | 0.01707000  |
| H | 0.23647000  | 2.58621100  | 0.87897100  |
| H | 2.58126200  | 1.07891500  | 0.01871300  |

Pi-C2 Complex

|   |             |             |             |
|---|-------------|-------------|-------------|
| N | -0.29486800 | -0.74027200 | -0.01170700 |
| N | 0.09815400  | 1.43860900  | 0.00027900  |
| C | -2.80655500 | -0.91206500 | 0.00421800  |
| C | -1.53177400 | -0.14622800 | 0.00072100  |
| C | -1.25982400 | 1.20654600  | 0.00813300  |
| C | 0.65512800  | 0.23251200  | -0.01173600 |
| H | -2.88362000 | -1.55294300 | 0.88263200  |
| H | -3.64469100 | -0.21873700 | 0.01405000  |
| H | -1.97484700 | 2.01316000  | 0.01854400  |
| H | 1.71132000  | 0.01519000  | -0.02005800 |
| O | 3.96553500  | -0.40578500 | 0.00100000  |
| H | 4.50886200  | -0.52249000 | 0.78789000  |
| H | 4.60586600  | -0.38554100 | -0.71845700 |
| H | -0.11692300 | -1.73345300 | -0.01952000 |
| H | -2.89510100 | -1.54186200 | -0.88110300 |

Atomic Coordinates (x y z) for Optimized Geometries of 5-methylimidazole...acetone Complexes:

*BHandHLYP/6-31+G(d) Level:*

Acetone

|   |             |             |             |
|---|-------------|-------------|-------------|
| O | 0.00000000  | 0.00000000  | 1.39043100  |
| C | 0.00000000  | 0.00000000  | 0.17776300  |
| C | 0.00000000  | 1.28062500  | -0.60790600 |
| H | 0.12435500  | 2.13176400  | 0.05154800  |
| H | 0.79111800  | 1.26999200  | -1.35424300 |
| H | -0.94262000 | 1.37452100  | -1.14488100 |
| C | 0.00000000  | -1.28062500 | -0.60790600 |
| H | -0.79111800 | -1.26999200 | -1.35424300 |
| H | 0.94262000  | -1.37452100 | -1.14488100 |
| H | -0.12435500 | -2.13176400 | 0.05154800  |

Tau-5-methylimidazole

|   |             |             |             |
|---|-------------|-------------|-------------|
| N | 0.09284700  | -1.13791300 | -0.00010200 |
| N | 1.44980300  | 0.58647200  | 0.00007600  |
| C | -0.65541600 | 0.01672900  | -0.00012400 |
| C | 0.17675500  | 1.09690200  | 0.00005500  |
| C | 1.34384800  | -0.75488600 | -0.00000800 |
| H | -0.01589600 | 2.15124200  | -0.00061800 |
| H | 2.30339900  | 1.11196300  | 0.00012500  |
| H | 2.20085900  | -1.40120000 | 0.00022200  |
| C | -2.14521700 | -0.01380000 | 0.00008400  |
| H | -2.52714300 | -0.53199500 | 0.87764800  |
| H | -2.55230500 | 0.99326800  | -0.00035500 |
| H | -2.52728800 | -0.53286200 | -0.87688500 |

#### Tau-C4 Complex

|   |             |             |             |
|---|-------------|-------------|-------------|
| N | 3.61220100  | 0.00149300  | -0.03925300 |
| N | 1.99173800  | -1.47720000 | -0.07324500 |
| C | 2.32715600  | 2.14466600  | 0.13287200  |
| C | 2.40576900  | 0.65915900  | 0.04109900  |
| C | 1.38807800  | -0.24872500 | 0.02092500  |
| C | 3.32143500  | -1.27239300 | -0.10589600 |
| H | 2.78958700  | 2.61737700  | -0.73168500 |
| H | 1.29328500  | 2.47419700  | 0.18345900  |
| H | 0.32175700  | -0.13817000 | 0.06274900  |
| H | 1.52953000  | -2.36577100 | -0.11067200 |
| O | -2.02382800 | -0.19950000 | 0.12324200  |
| H | 4.02798800  | -2.07732300 | -0.17808000 |
| H | 2.84192700  | 2.51212800  | 1.01874000  |
| C | -3.22108300 | -0.03606700 | 0.01608300  |
| C | -4.18440900 | -1.18184600 | 0.14027000  |
| H | -4.85768100 | -1.00706400 | 0.97740500  |
| H | -4.80065500 | -1.25058100 | -0.75381100 |
| H | -3.65103500 | -2.11323200 | 0.29082200  |
| C | -3.80803000 | 1.32127800  | -0.24715500 |
| H | -4.34621900 | 1.31164800  | -1.19314700 |
| H | -4.53049200 | 1.57287700  | 0.52650400  |
| H | -3.02843100 | 2.07343200  | -0.27991800 |

#### Tau-C2 Complex

|   |             |             |             |
|---|-------------|-------------|-------------|
| N | -1.96488200 | -0.81428900 | 0.15135500  |
| N | -1.73263100 | 1.32125200  | -0.29148700 |
| C | -4.45764500 | -1.03292300 | 0.26829900  |
| C | -3.21217600 | -0.23904400 | 0.07002700  |
| C | -3.08191200 | 1.08998200  | -0.20490200 |
| C | -1.10681500 | 0.14985900  | -0.07048400 |
| H | -4.48149600 | -1.48623900 | 1.25753900  |
| H | -5.33760400 | -0.40440500 | 0.16479400  |
| H | -3.80572300 | 1.86842800  | -0.34289900 |
| H | -1.28953200 | 2.19955900  | -0.48349800 |
| H | -0.03677900 | 0.05605700  | -0.08257300 |
| O | 2.27471600  | 0.11464500  | -0.09918500 |
| H | -4.53068600 | -1.83802900 | -0.46049100 |
| C | 3.46657500  | -0.08768900 | 0.00250000  |
| C | 4.06978200  | -1.41842200 | -0.34545300 |
| H | 4.76669200  | -1.29885500 | -1.17310000 |
| H | 4.64036700  | -1.80379300 | 0.49688700  |
| H | 3.29708300  | -2.12656800 | -0.62127100 |
| C | 4.40653600  | 0.98135900  | 0.48155100  |
| H | 4.88264000  | 0.66212300  | 1.40690000  |
| H | 5.20001400  | 1.13692600  | -0.24628800 |
| H | 3.87381200  | 1.91017200  | 0.64917800  |

#### Proto-5-methylimidazole

|   |            |             |             |
|---|------------|-------------|-------------|
| N | 3.38829200 | 0.03127500  | 0.00531000  |
| N | 1.88535300 | -1.47424600 | 0.03104000  |
| C | 2.08147800 | 2.18064000  | -0.03959800 |
| C | 2.17959300 | 0.69978500  | -0.01148300 |
| C | 1.22772200 | -0.26416900 | 0.00507300  |
| C | 3.18884900 | -1.27591100 | 0.03069600  |
| H | 2.58064500 | 2.58798900  | -0.91486900 |
| H | 1.03915400 | 2.47606300  | -0.06980700 |

|   |             |             |             |
|---|-------------|-------------|-------------|
| H | 0.15633300  | -0.19766500 | 0.00226800  |
| O | -1.95161900 | 0.36117400  | -0.02628700 |
| H | 4.29587700  | 0.46340800  | 0.00023900  |
| H | 3.94796300  | -2.03096100 | 0.04912500  |
| H | 1.44587400  | -2.37757900 | 0.04936100  |
| H | 2.53634500  | 2.61846700  | 0.84520500  |
| C | -3.11206300 | 0.00547400  | -0.00641200 |
| C | -4.23446100 | 0.99847300  | 0.07733600  |
| H | -4.94477600 | 0.83403800  | -0.73025400 |
| H | -4.77614100 | 0.85714800  | 1.01127200  |
| H | -3.85154800 | 2.01118600  | 0.03152400  |
| C | -3.48810900 | -1.44691400 | -0.06567900 |
| H | -2.60298400 | -2.07174900 | -0.03884400 |
| H | -4.14489000 | -1.70119300 | 0.76353600  |
| H | -4.04246000 | -1.64201700 | -0.98251400 |

#### Proto-C4 Complex

|   |             |             |             |
|---|-------------|-------------|-------------|
| N | -0.11717200 | -1.04821900 | 0.00016600  |
| N | -1.45018000 | 0.61095200  | -0.00003300 |
| C | 2.16353900  | 0.01554600  | -0.00003100 |
| C | 0.68077700  | 0.07872500  | -0.00000700 |
| C | -0.17495000 | 1.12826200  | 0.00001500  |
| C | -1.39430200 | -0.70584200 | -0.00015300 |
| H | 2.53018600  | -0.50530600 | -0.88055100 |
| H | 2.57140600  | 1.01966100  | -0.00005400 |
| H | 0.01013000  | 2.18227200  | 0.00001800  |
| H | -2.30228100 | 1.14426400  | 0.00041200  |
| H | -2.22976100 | -1.37583800 | -0.00013100 |
| H | 0.21110700  | -1.99895200 | 0.00001400  |
| H | 2.53029300  | -0.50536800 | 0.88042100  |

#### Proto-C2 Complex

|   |             |             |             |
|---|-------------|-------------|-------------|
| N | -1.69132600 | -0.71216900 | -0.02191600 |
| N | -1.58958800 | 1.39082800  | -0.31434500 |
| C | -4.14779800 | -1.15486200 | 0.30633200  |
| C | -2.99249000 | -0.25637800 | 0.05940300  |
| C | -2.91805000 | 1.08203500  | -0.12769500 |
| C | -0.86037200 | 0.29316600  | -0.24759200 |
| H | -4.04101100 | -1.67464900 | 1.25483000  |
| H | -5.06266200 | -0.57425600 | 0.33490000  |
| H | -3.68360700 | 1.82972800  | -0.14421100 |
| H | -1.21929400 | 2.31045000  | -0.47797300 |
| H | 0.20968300  | 0.22285000  | -0.35354100 |
| O | 2.20505800  | -0.10698100 | -0.68635700 |
| H | -1.40152600 | -1.67008200 | 0.07320400  |
| H | -4.23787100 | -1.89908200 | -0.48055600 |
| C | 3.22456000  | -0.09670400 | -0.02589500 |
| C | 4.52900500  | -0.56748200 | -0.59870500 |
| H | 5.30628700  | 0.17537000  | -0.43538200 |
| H | 4.84149400  | -1.47388000 | -0.08254100 |
| H | 4.42827200  | -0.77305700 | -1.65793700 |
| C | 3.23518600  | 0.38438200  | 1.39562200  |
| H | 3.69852000  | -0.35720000 | 2.04237100  |
| H | 3.83855900  | 1.28797400  | 1.46517900  |
| H | 2.22883900  | 0.59613200  | 1.73752100  |

#### Pi-5-Methylimidazole

|   |             |             |            |
|---|-------------|-------------|------------|
| N | -0.18169600 | -1.03078100 | 0.00026800 |
|---|-------------|-------------|------------|

|   |             |             |             |
|---|-------------|-------------|-------------|
| N | -1.52239500 | 0.70825600  | -0.00002800 |
| C | 2.12416900  | -0.02470000 | -0.00002700 |
| C | 0.64005300  | 0.06781600  | -0.00004900 |
| C | -0.21402800 | 1.13119400  | 0.00002000  |
| C | -1.46089600 | -0.59589500 | -0.00010800 |
| H | 2.49279300  | -0.55046300 | -0.87869400 |
| H | 2.55362700  | 0.97199100  | -0.00035500 |
| H | 0.04009900  | 2.17465300  | 0.00010000  |
| H | -2.29719700 | -1.26875900 | -0.00000800 |
| H | 0.11071900  | -1.99029300 | -0.00068300 |
| H | 2.49280400  | -0.54993700 | 0.87893900  |

#### Pi-C4 Complex

|   |             |             |             |
|---|-------------|-------------|-------------|
| N | -3.57835400 | -0.01121400 | -0.01265500 |
| N | -2.03895100 | -1.57640900 | -0.01929000 |
| C | -2.26805900 | 2.13496600  | 0.03118500  |
| C | -2.37729000 | 0.65195100  | 0.00924300  |
| C | -1.43895800 | -0.33823600 | 0.00477100  |
| C | -3.32249300 | -1.33776700 | -0.02910600 |
| H | -2.74520300 | 2.55947500  | 0.91248700  |
| H | -1.22250400 | 2.42570200  | 0.04296500  |
| H | -0.37022000 | -0.22961600 | 0.01753000  |
| O | 2.09491800  | 0.05120200  | 0.04511000  |
| H | -4.48797300 | 0.41108900  | -0.01574300 |
| H | -4.10329800 | -2.07417400 | -0.04784800 |
| H | -2.73230700 | 2.58427900  | -0.84467900 |
| C | 3.30467300  | -0.02689100 | 0.00765300  |
| C | 4.16934300  | 1.19956700  | -0.06514200 |
| H | 4.71337000  | 1.20590600  | -1.00817000 |
| H | 3.56503800  | 2.09620500  | 0.00933700  |
| H | 4.91177600  | 1.18650200  | 0.72981900  |
| C | 4.00716400  | -1.35470200 | 0.03129800  |
| H | 4.60642000  | -1.43381300 | 0.93671400  |
| H | 3.28886500  | -2.16582700 | 0.00131500  |
| H | 4.69153800  | -1.43530600 | -0.81040700 |

#### Pi-C2 Complex

|   |             |             |             |
|---|-------------|-------------|-------------|
| N | -2.01234300 | -0.72394400 | -0.31106100 |
| N | -1.46164700 | 1.23100000  | 0.52006800  |
| C | -4.52763700 | -0.72840300 | -0.25028000 |
| C | -3.19924600 | -0.10344700 | -0.01324300 |
| C | -2.83073000 | 1.10515800  | 0.49986000  |
| C | -1.00390100 | 0.11158500  | 0.02480400  |
| H | -4.63998400 | -1.65551000 | 0.30859600  |
| H | -5.31414500 | -0.04982200 | 0.06418700  |
| H | -3.47418800 | 1.88857100  | 0.85466900  |
| H | 0.03035900  | -0.14513800 | -0.11268000 |
| O | 2.28411500  | -0.64826200 | -0.23468600 |
| H | -1.90666600 | -1.63826800 | -0.70950800 |
| H | -4.68129200 | -0.95645400 | -1.30333900 |
| C | 3.39069200  | -0.17292800 | -0.08837500 |
| C | 3.81118200  | 1.07440200  | -0.81192200 |
| H | 4.66621000  | 0.85952300  | -1.45014900 |
| H | 2.99574300  | 1.45898600  | -1.41333900 |
| H | 4.13043100  | 1.83071100  | -0.09779700 |
| C | 4.40148700  | -0.80447800 | 0.82556600  |
| H | 5.31268300  | -1.03152600 | 0.27604300  |
| H | 4.67211900  | -0.10449600 | 1.61393100  |
| H | 4.00265300  | -1.71119600 | 1.26536200  |

*BHandHLYP/6-31+G(d,p) Level:*

Acetone

|   |             |             |             |
|---|-------------|-------------|-------------|
| O | 0.00000000  | 0.00000000  | 1.38985700  |
| C | 0.00000000  | 0.00000000  | 0.17692900  |
| C | 0.00000000  | 1.28028100  | -0.60755900 |
| H | 0.12028800  | 2.12997600  | 0.05314900  |
| H | 0.79308900  | 1.26996800  | -1.35074800 |
| H | -0.94055500 | 1.37069500  | -1.14726400 |
| C | 0.00000000  | -1.28028100 | -0.60755900 |
| H | -0.79308900 | -1.26996800 | -1.35074800 |
| H | 0.94055500  | -1.37069500 | -1.14726400 |
| H | -0.12028800 | -2.12997600 | 0.05314900  |

Tau-5-Methylimidazole

|   |             |             |             |
|---|-------------|-------------|-------------|
| N | 0.09271300  | -1.13774400 | -0.00002200 |
| N | 1.44961300  | 0.58671000  | 0.00021400  |
| C | -0.65546500 | 0.01646200  | -0.00001200 |
| C | 0.17651900  | 1.09679600  | 0.00006600  |
| C | 1.34389000  | -0.75462400 | -0.00018700 |
| H | -0.01820400 | 2.15014300  | -0.00087500 |
| H | 2.30224600  | 1.11133800  | -0.00021000 |
| H | 2.20063400  | -1.40061900 | 0.00017800  |
| C | -2.14481800 | -0.01387800 | 0.00003100  |
| H | -2.52535300 | -0.53277100 | 0.87684400  |
| H | -2.55085000 | 0.99271300  | 0.00047000  |
| H | -2.52550700 | -0.53209700 | -0.87714400 |

Tau-C4 Complex

|   |             |             |             |
|---|-------------|-------------|-------------|
| N | 3.59960900  | 0.01697000  | 0.02191100  |
| N | 1.98453400  | -1.46358600 | -0.09428100 |
| C | 2.30482900  | 2.15825400  | 0.12383200  |
| C | 2.39019100  | 0.67322600  | 0.03823200  |
| C | 1.37557500  | -0.23564100 | -0.03359800 |
| C | 3.31395300  | -1.25751100 | -0.05784000 |
| H | 2.80971400  | 2.62927800  | -0.71660400 |
| H | 1.26974300  | 2.48500700  | 0.12156900  |
| H | 0.30905600  | -0.12332600 | -0.04657700 |
| H | 1.52671900  | -2.35176600 | -0.15395700 |
| O | -2.00933100 | 0.19295500  | -0.09098900 |
| H | 4.02377500  | -2.06154100 | -0.09180800 |
| H | 2.77352700  | 2.52632100  | 1.03376000  |
| C | -3.20422700 | -0.00297300 | -0.01351900 |
| C | -4.19301700 | 1.11876300  | -0.14583300 |
| H | -4.84635000 | 0.93285000  | -0.99527900 |
| H | -4.82536100 | 1.16263700  | 0.73765200  |
| H | -3.67997300 | 2.06316800  | -0.27892000 |
| C | -3.76005800 | -1.37783000 | 0.21961400  |
| H | -4.32329600 | -1.39189100 | 1.14998300  |
| H | -4.45426000 | -1.63827000 | -0.57569600 |
| H | -2.96112100 | -2.10752300 | 0.26504800  |

Tau-C2 Complex

|   |             |             |             |
|---|-------------|-------------|-------------|
| N | -1.92639800 | -0.77498400 | 0.24154400  |
| N | -1.77415800 | 1.29072400  | -0.47979900 |

|   |             |             |             |
|---|-------------|-------------|-------------|
| C | -4.40738100 | -1.05607600 | 0.43438900  |
| C | -3.19345600 | -0.25559000 | 0.11060300  |
| C | -3.11316600 | 1.02951200  | -0.33757400 |
| C | -1.10510500 | 0.17893000  | -0.12066100 |
| H | -4.39719200 | -1.37996800 | 1.47263000  |
| H | -5.30860500 | -0.47344500 | 0.27142000  |
| H | -3.86613900 | 1.75814100  | -0.56056900 |
| H | -1.36532800 | 2.14876200  | -0.79391100 |
| H | -0.03307400 | 0.11795800  | -0.14038600 |
| O | 2.27134300  | 0.08964000  | -0.17102100 |
| H | -4.46487200 | -1.94814400 | -0.18523800 |
| C | 3.45993900  | -0.07655700 | 0.00807900  |
| C | 4.20694100  | -1.18828000 | -0.66957500 |
| H | 5.06788800  | -0.79197200 | -1.20202600 |
| H | 4.58715200  | -1.87896000 | 0.08006600  |
| H | 3.55835200  | -1.71814400 | -1.35615000 |
| C | 4.24871100  | 0.82134900  | 0.91623900  |
| H | 4.78300400  | 0.23131900  | 1.65658200  |
| H | 4.99725700  | 1.35624400  | 0.33561500  |
| H | 3.59580800  | 1.53117900  | 1.40891400  |

#### Proto-5-Methylimidazole

|   |             |             |             |
|---|-------------|-------------|-------------|
| N | -0.11724900 | -1.04843200 | 0.00027200  |
| N | -1.44972700 | 0.61154400  | -0.00035200 |
| C | 2.16304400  | 0.01552400  | 0.00003200  |
| C | 0.68067600  | 0.07760700  | -0.00041300 |
| C | -0.17419300 | 1.12786400  | 0.00027900  |
| C | -1.39434400 | -0.70486100 | 0.00012400  |
| H | 2.52923200  | -0.50680600 | -0.87893600 |
| H | 2.56857000  | 1.01970600  | -0.00153800 |
| H | 0.01368400  | 2.18079600  | -0.00047700 |
| H | -2.30096300 | 1.14412700  | 0.00100000  |
| H | -2.22979300 | -1.37434300 | -0.00014900 |
| H | 0.20891800  | -1.99868900 | -0.00092400 |
| H | 2.52808900  | -0.50337700 | 0.88145700  |

#### Proto-C4 Complex

|   |             |             |             |
|---|-------------|-------------|-------------|
| N | 3.37366300  | -0.00803000 | -0.00330500 |
| N | 1.82063300  | -1.46214200 | 0.02974900  |
| C | 2.13589100  | 2.18251900  | -0.04346200 |
| C | 2.18819800  | 0.69983900  | -0.01384400 |
| C | 1.20442100  | -0.23125600 | 0.00715800  |
| C | 3.12959000  | -1.30711400 | 0.02313900  |
| H | 2.62299900  | 2.57124600  | -0.93308400 |
| H | 1.10314900  | 2.50880600  | -0.04711600 |
| H | 0.13645800  | -0.12294200 | 0.00706100  |
| O | -1.96066500 | 0.45128400  | 0.05340300  |
| H | 4.29446200  | 0.39271100  | -0.01322400 |
| H | 3.86130000  | -2.08855100 | 0.03711300  |
| H | 1.35407400  | -2.35073400 | 0.04845000  |
| H | 2.62798200  | 2.60679800  | 0.82695100  |
| C | -3.09515300 | 0.02150800  | 0.00849300  |
| C | -3.37345900 | -1.45052800 | -0.07709700 |
| H | -4.07550400 | -1.74746900 | 0.69773000  |
| H | -3.84290500 | -1.67224200 | -1.03330600 |
| H | -2.45565300 | -2.01782000 | 0.01579100  |
| C | -4.28071500 | 0.94066300  | 0.03496500  |
| H | -3.96083000 | 1.97447100  | -0.00523400 |
| H | -4.94506700 | 0.72286300  | -0.79719900 |



H -4.84785400 0.77001900 0.94762900

Proto-C2 Complex

N -1.80927700 -0.77382700 0.15694100  
N -1.43903800 1.20810000 -0.51713200  
C -4.31186500 -0.86309700 0.40945800  
C -3.04650300 -0.16661900 0.07045700  
C -2.80151300 1.09328700 -0.35887000  
C -0.85358400 0.06901000 -0.20123100  
H -4.31291200 -1.18200600 1.44776300  
H -5.14910700 -0.19357800 0.25469700  
H -3.46906400 1.90399100 -0.56201200  
H -0.95152500 2.02922200 -0.82603700  
H 0.20427900 -0.13459500 -0.22904900  
O 2.19622200 -0.53334700 -0.46309900  
H -1.64260600 -1.72089200 0.44670100  
H -4.45134500 -1.74000700 -0.21608800  
C 3.24240000 -0.14299800 0.01601200  
C 4.56375300 -0.61663900 -0.51104600  
H 5.08868500 0.22137000 -0.96502900  
H 5.18715000 -0.97936300 0.30195200  
H 4.42109100 -1.39681400 -1.24827400  
C 3.26868900 0.83077600 1.15628400  
H 3.68592200 0.34192300 2.03421600  
H 3.91897800 1.66912600 0.92058900  
H 2.27061900 1.18617300 1.38032500

Pi-5-Methylimidazole

N -0.18149000 -1.03091000 0.00028600  
N -1.52181400 0.70848800 -0.00003500  
C 2.12340600 -0.02497400 -0.00002200  
C 0.63981400 0.06742000 -0.00004900  
C -0.21337300 1.13149100 0.00001200  
C -1.46084000 -0.59565800 -0.00009900  
H 2.49071400 -0.55056300 -0.87843100  
H 2.55142900 0.97141500 -0.00042100  
H 0.04295800 2.17381900 0.00009700  
H -2.29690400 -1.26816300 0.00002400  
H 0.11015700 -1.98931100 -0.00083600  
H 2.49072500 -0.54991900 0.87875700

Pi-C4 Complex

N -3.56961400 -0.00868500 -0.01457700  
N -2.03250700 -1.57617300 -0.02049200  
C -2.25602700 2.13425900 0.03401000  
C -2.36774600 0.65196600 0.01001300  
C -1.43020100 -0.33900200 0.00597100  
C -3.31569300 -1.33586000 -0.03216100  
H -2.73358900 2.55713700 0.91495900  
H -1.21049600 2.42184600 0.04756500  
H -0.36198600 -0.23008400 0.02056800  
O 2.08387800 0.05733300 0.05066800  
H -4.47748600 0.41430300 -0.01894600  
H -4.09736700 -2.07067900 -0.05303800  
H -2.71823300 2.58418400 -0.84170600  
C 3.29334800 -0.02678000 0.00852200  
C 4.16237700 1.19500500 -0.07195800  
H 4.70948800 1.18966700 -1.01230500

|   |            |             |             |
|---|------------|-------------|-------------|
| H | 3.56082900 | 2.09321400  | -0.00690600 |
| H | 4.90108200 | 1.18396900  | 0.72555300  |
| C | 3.98841200 | -1.35745100 | 0.03389500  |
| H | 4.59894000 | -1.43120500 | 0.93125500  |
| H | 3.26517100 | -2.16346500 | 0.01923800  |
| H | 4.66064600 | -1.44635800 | -0.81584700 |

Pi-C2 Complex

|   |             |             |             |
|---|-------------|-------------|-------------|
| N | -2.00251400 | -0.72355500 | -0.30731600 |
| N | -1.45843800 | 1.23649100  | 0.51619400  |
| C | -4.51689300 | -0.73478900 | -0.24796800 |
| C | -3.19088000 | -0.10533400 | -0.01277200 |
| C | -2.82726200 | 1.10664900  | 0.49573300  |
| C | -0.99659600 | 0.11658500  | 0.02586000  |
| H | -4.62555100 | -1.65953100 | 0.31411800  |
| H | -5.30409700 | -0.05721400 | 0.06400500  |
| H | -3.47475100 | 1.88786500  | 0.84625700  |
| H | 0.03826600  | -0.13770800 | -0.10990900 |
| O | 2.27884100  | -0.66025100 | -0.23017500 |
| H | -1.89376100 | -1.63802700 | -0.70135500 |
| H | -4.66844100 | -0.96631400 | -1.29981900 |
| C | 3.38175100  | -0.17454900 | -0.08796600 |
| C | 3.78657200  | 1.07672300  | -0.81172400 |
| H | 4.64226000  | 0.87015400  | -1.45054900 |
| H | 2.96558900  | 1.45157000  | -1.41024100 |
| H | 4.09941000  | 1.83440900  | -0.09732700 |
| C | 4.40107900  | -0.79788400 | 0.82061000  |
| H | 5.31061700  | -1.01575800 | 0.26610300  |
| H | 4.66875500  | -0.09518100 | 1.60653500  |
| H | 4.01100800  | -1.70722700 | 1.26079600  |

Tau-N3 Complex

|   |             |             |             |
|---|-------------|-------------|-------------|
| N | -2.70293900 | 1.06445300  | -0.42715200 |
| N | -0.78010600 | 0.01368500  | -0.23571800 |
| C | -4.30176600 | -0.65670200 | 0.44127700  |
| C | -2.93097400 | -0.18649700 | 0.09503400  |
| C | -1.74373800 | -0.84817500 | 0.21829600  |
| C | -1.40697300 | 1.14205600  | -0.60933500 |
| H | -4.95052000 | -0.65186200 | -0.43180000 |
| H | -4.27433500 | -1.66800700 | 0.83497600  |
| H | -1.50945100 | -1.82946700 | 0.57943100  |
| H | 0.21566500  | -0.16202600 | -0.28269100 |
| H | -0.88081400 | 1.98912800  | -1.00635900 |
| O | 2.05596000  | -0.58277900 | -0.47229900 |
| H | -4.75941500 | -0.01496800 | 1.19090400  |
| C | 3.06840100  | -0.12396800 | 0.02131800  |
| C | 3.02178500  | 1.01521600  | 0.99418400  |
| H | 3.61303300  | 0.78419000  | 1.87610000  |
| H | 3.46897800  | 1.89310900  | 0.53214300  |
| H | 2.00094000  | 1.23855900  | 1.27800400  |
| C | 4.41658400  | -0.67900600 | -0.32376400 |
| H | 5.09956900  | 0.12255600  | -0.59172500 |
| H | 4.83218700  | -1.17206000 | 0.55279800  |
| H | 4.33787700  | -1.39142400 | -1.13535000 |

Pi-N1 Complex

|   |             |             |             |
|---|-------------|-------------|-------------|
| N | -1.12476500 | -0.23789300 | -0.07917700 |
|---|-------------|-------------|-------------|

|   |             |             |             |
|---|-------------|-------------|-------------|
| N | -2.99435900 | -1.39791200 | -0.12511300 |
| C | -1.89496000 | 2.13645100  | 0.21242400  |
| C | -2.13519600 | 0.67636300  | 0.06381500  |
| C | -3.28206200 | -0.06325700 | 0.03250900  |
| C | -1.68952600 | -1.45887500 | -0.18776500 |
| H | -1.37210600 | 2.54548300  | -0.64909400 |
| H | -2.84205500 | 2.65622900  | 0.30868800  |
| H | -4.29193100 | 0.29181900  | 0.11447400  |
| H | -1.10758100 | -2.35237000 | -0.31007800 |
| O | 1.68492400  | 0.51881700  | -0.19773400 |
| H | -0.13271000 | -0.03770300 | -0.10020300 |
| H | -1.29894600 | 2.35579000  | 1.09537800  |
| C | 2.77691500  | 0.01516600  | -0.01747600 |
| C | 2.92348900  | -1.41249300 | 0.41457500  |
| H | 3.32903100  | -1.43685700 | 1.42403200  |
| H | 1.96785300  | -1.92128400 | 0.39772300  |
| H | 3.63342900  | -1.92935400 | -0.22542800 |
| C | 4.03506900  | 0.80328200  | -0.22027700 |
| H | 4.68902000  | 0.70103700  | 0.64151400  |
| H | 4.57187500  | 0.40043400  | -1.07682200 |
| H | 3.80623100  | 1.84706000  | -0.39511900 |

#### Proto-N1 Complex

|   |             |             |             |
|---|-------------|-------------|-------------|
| N | 1.05076300  | -0.24801300 | 0.01408700  |
| N | 2.93208600  | -1.25666600 | 0.00499200  |
| C | 1.68663100  | 2.18390700  | -0.01836400 |
| C | 2.01631400  | 0.73668900  | -0.00625400 |
| C | 3.20722900  | 0.09079100  | -0.01187200 |
| C | 1.62436900  | -1.43688700 | 0.02045300  |
| H | 1.11711400  | 2.45982800  | 0.86429300  |
| H | 2.59994900  | 2.76624900  | -0.03406600 |
| H | 4.20836700  | 0.46717000  | -0.02628000 |
| H | 3.61102900  | -1.99575100 | 0.00546700  |
| H | 1.12087900  | -2.38166100 | 0.03501900  |
| O | -1.63140100 | 0.47850100  | 0.02990400  |
| H | 0.03934800  | -0.08675700 | 0.02241300  |
| H | 1.09911400  | 2.44086800  | -0.89493800 |
| C | -2.74466100 | -0.01497200 | 0.00441500  |
| C | -3.96581600 | 0.85001600  | 0.00799900  |
| H | -4.66384500 | 0.52662900  | -0.75907200 |
| H | -4.47099900 | 0.73875000  | 0.96557900  |
| H | -3.69778100 | 1.88849800  | -0.13958900 |
| C | -2.94846100 | -1.49754300 | -0.03482400 |
| H | -3.71490200 | -1.79534000 | 0.67479900  |
| H | -3.30633200 | -1.77264100 | -1.02535200 |
| H | -2.02429500 | -2.02310100 | 0.16963800  |

#### Proto-N3 Complex

|   |             |             |             |
|---|-------------|-------------|-------------|
| N | -2.71804700 | 1.02979400  | -0.25262600 |
| N | -0.70392300 | 0.37717800  | 0.02330900  |
| C | -4.08286300 | -1.03785400 | 0.18765700  |
| C | -2.79601100 | -0.30732700 | 0.07723900  |
| C | -1.51391800 | -0.71036300 | 0.24997500  |
| C | -1.45123200 | 1.41709800  | -0.27863300 |
| H | -4.62066700 | -1.02284900 | -0.75592000 |
| H | -3.89349400 | -2.06938100 | 0.45858200  |
| H | -1.11711300 | -1.66878300 | 0.51199700  |
| O | 2.05128100  | 0.61731800  | 0.24487600  |

|   |             |             |             |
|---|-------------|-------------|-------------|
| H | -3.49748000 | 1.63269700  | -0.44607800 |
| H | -1.10139100 | 2.40347900  | -0.50446200 |
| H | 0.31917700  | 0.39129400  | 0.07973200  |
| H | -4.71831300 | -0.59337600 | 0.94824700  |
| C | 3.03596200  | -0.06541300 | 0.02499400  |
| C | 2.92473300  | -1.45740000 | -0.51425500 |
| H | 3.60402900  | -1.59354000 | -1.35100300 |
| H | 3.22914500  | -2.15827000 | 0.26055400  |
| H | 1.90925900  | -1.67718400 | -0.81859300 |
| C | 4.40981300  | 0.46386500  | 0.29199200  |
| H | 4.35834000  | 1.41844500  | 0.80000800  |
| H | 4.97939200  | -0.24771400 | 0.88357300  |
| H | 4.93374900  | 0.58220000  | -0.65423200 |

*BHandHLYP/6-311+G(d) Level:*

Acetone

|   |             |             |             |
|---|-------------|-------------|-------------|
| O | 0.00000000  | 0.00000000  | 1.38632300  |
| C | 0.00000000  | 0.00000000  | 0.18009600  |
| C | 0.00000000  | 1.27777400  | -0.60692300 |
| H | 0.14053400  | 2.12753500  | 0.04781100  |
| H | 0.77708200  | 1.25632300  | -1.36491100 |
| H | -0.94993200 | 1.37428100  | -1.12693900 |
| C | 0.00000000  | -1.27777400 | -0.60692300 |
| H | -0.77708200 | -1.25632300 | -1.36491100 |
| H | 0.94993200  | -1.37428100 | -1.12693900 |
| H | -0.14053400 | -2.12753500 | 0.04781100  |

Tau-C4 Complex

|   |             |             |             |
|---|-------------|-------------|-------------|
| N | -3.57258700 | -0.02605200 | -0.08143200 |
| N | -1.91667900 | -1.45800800 | -0.14092300 |
| C | -2.35033900 | 2.13575700  | 0.22571300  |
| C | -2.38748400 | 0.65677800  | 0.06231700  |
| C | -1.34839300 | -0.22114500 | 0.02706800  |
| C | -3.24851900 | -1.28469100 | -0.19973100 |
| H | -2.90227900 | 2.44536900  | 1.10904300  |
| H | -1.32913000 | 2.48641700  | 0.32549300  |
| H | -0.28881000 | -0.08422900 | 0.10449700  |
| H | -1.43230600 | -2.33030900 | -0.20707200 |
| O | 2.00487200  | 0.26940800  | 0.21854600  |
| H | -3.93054500 | -2.10175300 | -0.32856900 |
| H | -2.79733600 | 2.63497700  | -0.62973200 |
| C | 3.17315600  | 0.02444600  | 0.04146400  |
| C | 3.74634100  | -1.33018600 | 0.33718300  |
| H | 4.27017100  | -1.71294600 | -0.53376500 |
| H | 4.47812600  | -1.24434400 | 1.13628700  |
| H | 2.96490600  | -2.01769500 | 0.63219000  |
| C | 4.12286800  | 1.06015500  | -0.48425500 |
| H | 4.97733300  | 1.15499500  | 0.17928500  |
| H | 4.50464300  | 0.74081200  | -1.45052200 |
| H | 3.62533200  | 2.01517600  | -0.58757300 |

Tau-C2 Complex

|   |             |             |             |
|---|-------------|-------------|-------------|
| N | -2.02750600 | -0.82332200 | 0.36561800  |
| N | -1.50312600 | 1.12168200  | -0.49168400 |
| C | -4.52788900 | -0.74951800 | 0.27934500  |
| C | -3.18444200 | -0.15461200 | 0.04242700  |

|   |             |             |             |
|---|-------------|-------------|-------------|
| C | -2.87267000 | 1.05667100  | -0.49168400 |
| C | -1.04504900 | -0.02938100 | 0.03191700  |
| H | -4.67758300 | -0.96832300 | 1.33309300  |
| H | -5.31161000 | -0.07131500 | -0.03946500 |
| H | -3.48314900 | 1.85402000  | -0.86059900 |
| H | -0.94413700 | 1.88313200  | -0.81966500 |
| H | 0.00239300  | -0.23397000 | 0.14576300  |
| O | 2.26492100  | -0.61294800 | 0.22523200  |
| H | -4.64397100 | -1.68155800 | -0.26701700 |
| C | 3.38250700  | -0.17780200 | 0.08982700  |
| C | 4.36174900  | -0.80738700 | -0.85618100 |
| H | 4.77946200  | -0.05602000 | -1.51967700 |
| H | 5.18888200  | -1.22579700 | -0.28828400 |
| H | 3.88522000  | -1.58924600 | -1.43234800 |
| C | 3.85850700  | 1.01935500  | 0.85842200  |
| H | 4.80204400  | 0.80121300  | 1.34952800  |
| H | 4.04162100  | 1.83747600  | 0.16630700  |
| H | 3.11960200  | 1.32149300  | 1.58853400  |

#### Proto-C4 Complex

|   |             |             |             |
|---|-------------|-------------|-------------|
| N | 3.37071300  | -0.02412400 | 0.05429900  |
| N | 1.80606600  | -1.44993800 | -0.13088600 |
| C | 2.15716800  | 2.17707400  | 0.14475600  |
| C | 2.19453400  | 0.69908500  | 0.04222000  |
| C | 1.20460000  | -0.21301000 | -0.07544100 |
| C | 3.11234900  | -1.31425400 | -0.05118800 |
| H | 2.69893100  | 2.63654000  | -0.67559100 |
| H | 1.13048800  | 2.51703800  | 0.11206400  |
| H | 0.14059600  | -0.09188600 | -0.12367800 |
| O | -1.96546300 | 0.40418800  | -0.22902700 |
| H | 4.29402900  | 0.36103900  | 0.13096100  |
| H | 3.83339500  | -2.10367600 | -0.06856800 |
| H | 1.33075700  | -2.32863000 | -0.21809000 |
| H | 2.60195400  | 2.51249700  | 1.07598400  |
| C | -3.09191200 | 0.01690400  | -0.03121600 |
| C | -4.26445700 | 0.94923000  | -0.09918200 |
| H | -5.03825400 | 0.53682500  | -0.73945000 |
| H | -4.69406200 | 1.05199400  | 0.89419900  |
| H | -3.95752900 | 1.92083600  | -0.46252600 |
| C | -3.38444800 | -1.41748800 | 0.29420100  |
| H | -2.46622700 | -1.97044800 | 0.44073600  |
| H | -4.00691000 | -1.48340200 | 1.18133500  |
| H | -3.94792400 | -1.85904100 | -0.52393700 |

#### Proto-C2 Complex

|   |             |             |             |
|---|-------------|-------------|-------------|
| N | -1.81475000 | -0.77991300 | 0.16173400  |
| N | -1.43407800 | 1.19632400  | -0.51391300 |
| C | -4.31649300 | -0.85326700 | 0.41274700  |
| C | -3.04828400 | -0.16576400 | 0.07401500  |
| C | -2.79707500 | 1.08889900  | -0.35592700 |
| C | -0.85628700 | 0.05636500  | -0.19664200 |
| H | -4.31694700 | -1.17487200 | 1.44913900  |
| H | -5.14864800 | -0.17837500 | 0.26149700  |
| H | -3.45893900 | 1.90198000  | -0.56030300 |
| H | -0.94289700 | 2.01387200  | -0.82312700 |
| H | 0.19930200  | -0.15278700 | -0.22191900 |
| O | 2.18639900  | -0.58163700 | -0.38146300 |
| H | -1.65381200 | -1.72632900 | 0.45320800  |
| H | -4.46202700 | -1.72692800 | -0.21420900 |

|   |            |             |             |
|---|------------|-------------|-------------|
| C | 3.23966100 | -0.14574400 | 0.02038200  |
| C | 4.54585900 | -0.73860100 | -0.41284900 |
| H | 5.21678300 | 0.04095500  | -0.76057500 |
| H | 5.02205400 | -1.21019500 | 0.44315500  |
| H | 4.39086900 | -1.47352700 | -1.19126000 |
| C | 3.30046600 | 1.01076500  | 0.97200100  |
| H | 3.94108100 | 0.77128300  | 1.81513800  |
| H | 3.74635700 | 1.86275300  | 0.46487900  |
| H | 2.31035400 | 1.27447500  | 1.31897200  |

#### Pi-C4 Complex

|   |             |             |             |
|---|-------------|-------------|-------------|
| N | -3.51687400 | 0.01095700  | -0.10723600 |
| N | -2.02264300 | -1.58746700 | 0.01395000  |
| C | -2.16209400 | 2.12207000  | 0.02792300  |
| C | -2.30598000 | 0.64409800  | 0.00474200  |
| C | -1.39560700 | -0.36476800 | 0.07850900  |
| C | -3.29199100 | -1.32043400 | -0.09682100 |
| H | -2.69424700 | 2.56118200  | 0.86737300  |
| H | -1.11530700 | 2.38609100  | 0.11765200  |
| H | -0.33079000 | -0.27951600 | 0.17526600  |
| O | 2.09191100  | -0.18150400 | 0.44637000  |
| H | -4.41101100 | 0.45358800  | -0.18269000 |
| H | -4.08583800 | -2.03692100 | -0.17251000 |
| H | -2.54772600 | 2.57397000  | -0.88188300 |
| C | 3.23279500  | -0.05375300 | 0.07529900  |
| C | 3.82905500  | 1.29868100  | -0.18349000 |
| H | 4.04825300  | 1.39498800  | -1.24394200 |
| H | 3.14385600  | 2.08019700  | 0.11674300  |
| H | 4.77085600  | 1.40331200  | 0.34680200  |
| C | 4.12450600  | -1.23941900 | -0.14932000 |
| H | 4.93262800  | -1.22075400 | 0.57759600  |
| H | 3.56600900  | -2.16019300 | -0.04602400 |
| H | 4.58054700  | -1.18718800 | -1.13339800 |

#### Pi-C2 Complex

|   |             |             |             |
|---|-------------|-------------|-------------|
| N | -2.01339500 | -0.72234900 | -0.31370100 |
| N | -1.46701100 | 1.22516800  | 0.52734800  |
| C | -4.52608600 | -0.72561100 | -0.26028500 |
| C | -3.19993600 | -0.10336800 | -0.01670300 |
| C | -2.83556300 | 1.10007600  | 0.50252200  |
| C | -1.00743800 | 0.11191600  | 0.02966900  |
| H | -4.63917300 | -1.65250400 | 0.29532500  |
| H | -5.31138200 | -0.04788500 | 0.05216200  |
| H | -3.48111300 | 1.87890000  | 0.85788200  |
| H | 0.02614500  | -0.14347400 | -0.10604000 |
| O | 2.27472400  | -0.60591400 | -0.23590600 |
| H | -1.90653100 | -1.63242600 | -0.71566900 |
| H | -4.67309300 | -0.95038000 | -1.31314100 |
| C | 3.38947500  | -0.16762300 | -0.08793800 |
| C | 3.85047400  | 1.06659900  | -0.80551400 |
| H | 4.67236900  | 0.81240000  | -1.46965500 |
| H | 3.04040900  | 1.49874100  | -1.37763000 |
| H | 4.23093000  | 1.79227400  | -0.09255800 |
| C | 4.37973700  | -0.83029000 | 0.82350500  |
| H | 5.29856300  | -1.04378200 | 0.28522900  |
| H | 4.63549100  | -0.15076700 | 1.63234900  |
| H | 3.96845000  | -1.74371900 | 1.23193000  |

M06-2X/6-31+G(d,p) Level:

Acetone

|   |             |             |             |
|---|-------------|-------------|-------------|
| O | 0.00000000  | 0.00000000  | 1.39809500  |
| C | 0.00000000  | 0.00000000  | 0.17893700  |
| C | 0.00000000  | 1.28431200  | -0.61170600 |
| H | 0.16809100  | 2.13703100  | 0.04618100  |
| H | 0.76335600  | 1.25061500  | -1.39424500 |
| H | -0.96879500 | 1.39279100  | -1.11089500 |
| C | 0.00000000  | -1.28431200 | -0.61170600 |
| H | -0.76335600 | -1.25061500 | -1.39424500 |
| H | 0.96879500  | -1.39279100 | -1.11089500 |
| H | -0.16809100 | -2.13703100 | 0.04618100  |

Tau-5-Methylimidazole

|   |             |             |             |
|---|-------------|-------------|-------------|
| N | 0.08826100  | -1.14484800 | 0.00054200  |
| N | 1.45548600  | 0.58915500  | 0.00038500  |
| C | -0.65806400 | 0.01605400  | 0.00026900  |
| C | 0.17998300  | 1.10372600  | -0.00003700 |
| C | 1.34863900  | -0.76084700 | -0.00056700 |
| H | -0.01402800 | 2.16491300  | 0.00107800  |
| H | 2.31609600  | 1.11759300  | -0.00201000 |
| H | 2.21279500  | -1.40956800 | -0.00033000 |
| C | -2.15318200 | -0.01194800 | -0.00021900 |
| H | -2.53378100 | -0.54024800 | 0.87904500  |
| H | -2.55850300 | 1.00233100  | 0.00679400  |
| H | -2.53306600 | -0.52708000 | -0.88773500 |

Tau-C4 Complex

|   |             |             |             |
|---|-------------|-------------|-------------|
| N | -2.82580500 | 0.86662100  | 0.15872300  |
| N | -2.50156700 | -1.31514900 | 0.04482400  |
| C | -0.56877500 | 1.73384800  | -0.53234200 |
| C | -1.52859400 | 0.62341500  | -0.24595800 |
| C | -1.31144600 | -0.73057900 | -0.32155700 |
| C | -3.37684300 | -0.31932000 | 0.32251000  |
| H | -0.35400000 | 2.31317200  | 0.37182300  |
| H | 0.37363100  | 1.33279800  | -0.91363800 |
| H | -0.42984000 | -1.29592200 | -0.58544800 |
| H | -2.69318600 | -2.30538700 | 0.09557800  |
| O | 1.97712600  | -0.95435800 | -0.78045600 |
| H | -4.39339700 | -0.51218800 | 0.63470400  |
| H | -0.97850200 | 2.42115400  | -1.27845100 |
| C | 2.61040500  | -0.30457300 | 0.03510100  |
| C | 1.98162200  | 0.18446700  | 1.31575600  |
| H | 2.46495800  | -0.31186700 | 2.16388100  |
| H | 2.15135900  | 1.25932900  | 1.43247000  |
| H | 0.91201700  | -0.03091600 | 1.32164900  |
| C | 4.05756900  | 0.05207900  | -0.19178300 |
| H | 4.14311500  | 1.13696800  | -0.31479700 |
| H | 4.65585800  | -0.22032000 | 0.68251100  |
| H | 4.43895100  | -0.44828900 | -1.08182900 |

Tau-C2 Complex

|   |             |             |             |
|---|-------------|-------------|-------------|
| N | -2.02394600 | -0.80911600 | 0.34286700  |
| N | -1.63344800 | 1.18275200  | -0.52357500 |
| C | -4.53609600 | -0.85501700 | 0.37223000  |

|   |             |             |             |
|---|-------------|-------------|-------------|
| C | -3.22897900 | -0.19101900 | 0.07684200  |
| C | -3.00133100 | 1.05040100  | -0.46318600 |
| C | -1.08968900 | 0.04402900  | -0.02960500 |
| H | -4.63604800 | -1.06396300 | 1.44176900  |
| H | -5.36998600 | -0.21783300 | 0.06934200  |
| H | -3.67194000 | 1.82553300  | -0.80000900 |
| H | -1.12392900 | 1.98199700  | -0.87215100 |
| H | -0.02017400 | -0.10658000 | 0.03614400  |
| O | 2.24191700  | -0.23241400 | 0.16548300  |
| H | -4.62011400 | -1.80679200 | -0.16085700 |
| C | 3.45357100  | -0.12585200 | 0.07078900  |
| C | 4.26290700  | -1.05604800 | -0.79635900 |
| H | 4.92921400  | -0.48219400 | -1.44697600 |
| H | 4.89639000  | -1.67915400 | -0.15635700 |
| H | 3.60730000  | -1.69127200 | -1.39177600 |
| C | 4.21263600  | 0.94322100  | 0.81460300  |
| H | 5.06418000  | 0.50521900  | 1.34311100  |
| H | 4.61661300  | 1.66027100  | 0.09205900  |
| H | 3.55679400  | 1.46033600  | 1.51491100  |

#### Proto-5-Methylimidazole

|   |             |             |             |
|---|-------------|-------------|-------------|
| N | -0.11404300 | -1.05248200 | -0.00002200 |
| N | -1.45524000 | 0.61373300  | -0.00008300 |
| C | 2.17170200  | 0.01665600  | -0.00001100 |
| C | 0.68429700  | 0.07818200  | 0.00012600  |
| C | -0.17825400 | 1.13479800  | -0.00003100 |
| C | -1.40052600 | -0.71188900 | 0.00004300  |
| H | 2.53663300  | -0.50619500 | -0.88730500 |
| H | 2.57579300  | 1.02888500  | 0.00034000  |
| H | 0.00926200  | 2.19563400  | 0.00013500  |
| H | -2.31486900 | 1.14986700  | 0.00008200  |
| H | -2.24157000 | -1.38647500 | 0.00014800  |
| H | 0.21956300  | -2.01002500 | -0.00018300 |
| H | 2.53685800  | -0.50693300 | 0.88674600  |

#### Proto-C4 Complex

|   |             |             |             |
|---|-------------|-------------|-------------|
| N | 3.05249700  | 0.62980700  | -0.19420200 |
| N | 2.50032800  | -1.41028700 | 0.13284300  |
| C | 0.84904600  | 1.86320000  | -0.10821900 |
| C | 1.67715200  | 0.62781700  | -0.03858600 |
| C | 1.33271200  | -0.67596000 | 0.16966000  |
| C | 3.53331200  | -0.60655700 | -0.08760600 |
| H | 0.91863800  | 2.32166800  | -1.09793000 |
| H | -0.19014600 | 1.59802600  | 0.09034700  |
| H | 0.36271900  | -1.11785200 | 0.33644400  |
| O | -1.71983100 | -0.29330900 | 0.56132600  |
| H | 3.62392300  | 1.44937500  | -0.36443900 |
| H | 4.56817000  | -0.89941000 | -0.16382400 |
| H | 2.57203400  | -2.41320800 | 0.25473300  |
| H | 1.17881800  | 2.59277100  | 0.63566600  |
| C | -2.84528900 | -0.18272100 | 0.10130600  |
| C | -3.56021600 | 1.14343900  | 0.08370300  |
| H | -3.98538800 | 1.33514200  | -0.90548100 |
| H | -4.39543900 | 1.10354300  | 0.79107200  |
| H | -2.88176600 | 1.94782800  | 0.36856100  |
| C | -3.58157000 | -1.36471500 | -0.47330500 |
| H | -3.04138100 | -2.28844200 | -0.26641000 |
| H | -4.59501600 | -1.41642900 | -0.06544000 |
| H | -3.67717300 | -1.23019700 | -1.55611300 |



### Proto-C2 Complex

|   |             |             |             |
|---|-------------|-------------|-------------|
| N | -1.85924700 | -0.83760500 | 0.13262000  |
| N | -1.33257500 | 1.16416500  | -0.39553700 |
| C | -4.37543900 | -0.77473100 | 0.30542600  |
| C | -3.05222900 | -0.14042000 | 0.05352200  |
| C | -2.70754900 | 1.13487300  | -0.28334200 |
| C | -0.82953100 | -0.03845900 | -0.14078700 |
| H | -4.42075100 | -1.18854600 | 1.31565500  |
| H | -5.16195800 | -0.02772400 | 0.19838900  |
| H | -3.31734800 | 2.00701500  | -0.45194000 |
| H | -0.77620600 | 1.97625700  | -0.63381900 |
| H | 0.22104200  | -0.31210600 | -0.15245200 |
| O | 2.21821900  | -0.78631800 | -0.28268100 |
| H | -1.76943800 | -1.81957800 | 0.36606800  |
| H | -4.55969000 | -1.58078300 | -0.40890200 |
| C | 3.22575200  | -0.16495600 | 0.01911100  |
| C | 4.59881300  | -0.73642300 | -0.21608800 |
| H | 5.21945200  | -0.01525100 | -0.75569700 |
| H | 5.08071700  | -0.91486700 | 0.75081800  |
| H | 4.53382400  | -1.67126900 | -0.77225500 |
| C | 3.15424800  | 1.20459900  | 0.64215700  |
| H | 3.77393600  | 1.24020700  | 1.54270000  |
| H | 3.56491400  | 1.93712100  | -0.06036500 |
| H | 2.12412200  | 1.46724800  | 0.88368000  |

### Pi-5-Methylimidazole

|   |             |             |             |
|---|-------------|-------------|-------------|
| N | -0.17797200 | -1.03543800 | 0.00009600  |
| N | -1.53080500 | 0.71145300  | -0.00004100 |
| C | 2.13267900  | -0.02314000 | -0.00002700 |
| C | 0.64349200  | 0.06850400  | 0.00005400  |
| C | -0.21866300 | 1.13744000  | -0.00000100 |
| C | -1.46637600 | -0.60205500 | -0.00003300 |
| H | 2.49994800  | -0.55020900 | -0.88558600 |
| H | 2.55906100  | 0.98153400  | 0.00059700  |
| H | 0.03996300  | 2.18732400  | 0.00006400  |
| H | -2.30547300 | -1.28287000 | 0.00007100  |
| H | 0.12117500  | -2.00107100 | -0.00035400 |
| H | 2.49996600  | -0.55131300 | 0.88486200  |

### Pi-C4 Complex

|   |             |             |             |
|---|-------------|-------------|-------------|
| N | -1.72258300 | 0.26251700  | -0.08549100 |
| N | -0.96603200 | -1.81344000 | -0.11855700 |
| C | 0.37263900  | 1.66994200  | 0.03767900  |
| C | -0.35128300 | 0.36701200  | -0.02937700 |
| C | 0.09438600  | -0.93198900 | -0.05140500 |
| C | -2.04243100 | -1.05787700 | -0.13752400 |
| H | 0.10246200  | 2.23203600  | 0.93691400  |
| H | 1.44674200  | 1.47422200  | 0.05721100  |
| H | 1.12261300  | -1.26447900 | -0.02380200 |
| O | 3.38478300  | -0.15636300 | -0.04358400 |
| H | -2.37974300 | 1.03043300  | -0.08838000 |
| H | -3.06525300 | -1.40318100 | -0.18698400 |
| H | 0.14803800  | 2.29622600  | -0.83124200 |
| C | 4.53702800  | 0.24276200  | -0.06584900 |
| C | 4.86941800  | 1.67687000  | -0.39289800 |
| H | 5.37650200  | 1.71124200  | -1.36311500 |
| H | 3.96200700  | 2.27954800  | -0.43491400 |
| H | 5.56354400  | 2.08560600  | 0.34683900  |

|   |            |             |             |
|---|------------|-------------|-------------|
| C | 5.69760300 | -0.67274100 | 0.23097300  |
| H | 6.15299600 | -0.37202600 | 1.18055200  |
| H | 5.36041900 | -1.70696000 | 0.29917700  |
| H | 6.46672300 | -0.57302700 | -0.54025800 |

Pi-C2 Complex

|   |             |             |             |
|---|-------------|-------------|-------------|
| N | -1.97102500 | -0.94489200 | -0.06328200 |
| N | -1.02960700 | 1.05259800  | -0.06127100 |
| C | -4.43866700 | -0.46133800 | 0.14799800  |
| C | -3.00829400 | -0.04782200 | 0.05063700  |
| C | -2.39890700 | 1.18266700  | 0.04930800  |
| C | -0.80781000 | -0.24363200 | -0.12669200 |
| H | -4.61709200 | -1.07887000 | 1.03342200  |
| H | -5.06992200 | 0.42623700  | 0.21821700  |
| H | -2.87634400 | 2.15006800  | 0.12396300  |
| H | 0.16146400  | -0.71922900 | -0.21962300 |
| O | 2.42053700  | -1.13264600 | -0.24560000 |
| H | -2.05608300 | -1.95158900 | -0.09570800 |
| H | -4.74979500 | -1.03323200 | -0.73121600 |
| C | 3.14700200  | -0.17498200 | -0.03433900 |
| C | 2.63657700  | 1.24067500  | -0.12517800 |
| H | 3.07787700  | 1.71365900  | -1.00955900 |
| H | 1.54831300  | 1.26099700  | -0.20554200 |
| H | 2.96360300  | 1.81947600  | 0.74344100  |
| C | 4.60044100  | -0.35238600 | 0.32344400  |
| H | 5.22610400  | 0.28043000  | -0.31257600 |
| H | 4.75555100  | -0.02251700 | 1.35613600  |
| H | 4.89439800  | -1.39730300 | 0.22464900  |

Atomic Coordinates (x y z) for Optimized Geometries of 5-methylimidazole...N-methylacetamide Complexes:

N-methylacetamide

|   |             |             |             |
|---|-------------|-------------|-------------|
| O | -0.38895500 | 1.37581100  | -0.00001400 |
| C | -0.47686200 | 0.15051300  | -0.00008100 |
| C | -1.81461100 | -0.53812900 | 0.00000800  |
| H | -2.37061600 | -0.22003000 | -0.87631000 |
| H | -1.73950600 | -1.61947100 | -0.00092100 |
| H | -2.36952800 | -0.22157200 | 0.87760300  |
| N | 0.60666100  | -0.63614200 | 0.00010200  |
| H | 0.48383200  | -1.62829400 | -0.00044400 |
| C | 1.95121400  | -0.10338400 | 0.00000800  |
| H | 2.12791500  | 0.50453400  | 0.88207400  |
| H | 2.64842900  | -0.93113000 | -0.00255600 |
| H | 2.12604400  | 0.50847200  | -0.87966300 |

Tau-C4 Complex

|   |            |             |             |
|---|------------|-------------|-------------|
| N | 3.92330500 | -0.11582700 | 0.01874600  |
| N | 2.21774400 | -1.44456400 | -0.35376000 |
| C | 2.76805800 | 2.04780200  | 0.52140800  |
| C | 2.75775600 | 0.60126200  | 0.16446400  |
| C | 1.68703900 | -0.21261000 | -0.06423200 |
| C | 3.55745100 | -1.33334500 | -0.29086300 |
| H | 3.30359700 | 2.63206000  | -0.22358500 |
| H | 1.75619200 | 2.43466100  | 0.58972100  |
| H | 0.62916300 | -0.03313700 | -0.04881400 |
| H | 1.70530000 | -2.27646800 | -0.57138300 |

|   |             |             |             |
|---|-------------|-------------|-------------|
| O | -1.63615900 | 0.13930800  | -0.04197200 |
| H | 4.21472200  | -2.16082800 | -0.47735100 |
| H | 3.25794600  | 2.21226100  | 1.47856900  |
| C | -2.82008300 | 0.45757600  | -0.13123300 |
| C | -3.22776000 | 1.84969300  | -0.52906300 |
| H | -4.30236700 | 1.98335700  | -0.57701300 |
| H | -2.81426000 | 2.55223400  | 0.18776000  |
| H | -2.79768400 | 2.07496800  | -1.49984100 |
| N | -3.80572900 | -0.41164400 | 0.12047200  |
| H | -4.75356900 | -0.10612900 | 0.03238300  |
| C | -3.55187300 | -1.78037800 | 0.51316500  |
| H | -4.50186000 | -2.27328700 | 0.67348400  |
| H | -3.00436000 | -2.31110600 | -0.25979500 |
| H | -2.97431100 | -1.81880200 | 1.43156200  |

#### Tau-C2 Complex

|   |             |             |             |
|---|-------------|-------------|-------------|
| N | 2.20624900  | -0.16475100 | -0.82985900 |
| N | 1.95896400  | -0.05851900 | 1.34641000  |
| C | 4.69343800  | 0.01584200  | -1.06055100 |
| C | 3.44589100  | -0.03456400 | -0.24784900 |
| C | 3.30656700  | 0.03265800  | 1.10669200  |
| C | 1.34210800  | -0.17546100 | 0.15507300  |
| H | 4.67808100  | 0.85699700  | -1.74995400 |
| H | 5.56571800  | 0.11827400  | -0.42267200 |
| H | 4.02389900  | 0.13402600  | 1.89586000  |
| H | 1.51119800  | -0.04261500 | 2.24151700  |
| H | 0.27483100  | -0.26522300 | 0.06331000  |
| O | -1.92830500 | -0.63448500 | 0.01350500  |
| H | 4.81178800  | -0.88893900 | -1.65251000 |
| C | -3.13719100 | -0.43252200 | -0.08296200 |
| C | -4.11700200 | -1.57218200 | -0.13967600 |
| H | -5.14705700 | -1.24692800 | -0.22913500 |
| H | -3.86856900 | -2.20341000 | -0.98703100 |
| H | -4.00968400 | -2.16878100 | 0.76078000  |
| N | -3.64276700 | 0.80472900  | -0.14060900 |
| H | -4.63258200 | 0.91976000  | -0.22298100 |
| C | -2.80775000 | 1.98502100  | -0.09520300 |
| H | -3.44554200 | 2.85865900  | -0.12871300 |
| H | -2.22281600 | 2.00888600  | 0.81892100  |
| H | -2.12629900 | 2.01221500  | -0.94016300 |

#### Proto-C4 Complex

|   |             |             |             |
|---|-------------|-------------|-------------|
| N | -3.55750500 | -0.03160000 | 0.02901400  |
| N | -1.94996600 | -1.27617300 | -0.59827800 |
| C | -2.42351900 | 2.10793900  | 0.70881500  |
| C | -2.40912400 | 0.71816200  | 0.18926600  |
| C | -1.38950100 | -0.07899500 | -0.21180300 |
| C | -3.25841900 | -1.22841200 | -0.44625400 |
| H | -2.83585400 | 2.14364800  | 1.71315000  |
| H | -1.41210900 | 2.49423000  | 0.73905800  |
| H | -0.33020100 | 0.09907300  | -0.25424100 |
| O | 1.69214000  | 0.64053000  | -0.43452700 |
| H | -4.49128700 | 0.27416200  | 0.23733300  |
| H | -3.95266100 | -2.01299000 | -0.66653100 |
| H | -1.44786000 | -2.07301300 | -0.94539100 |
| H | -3.02066300 | 2.75500600  | 0.07275700  |
| C | 2.86228200  | 0.34937900  | -0.18941700 |
| C | 3.99081700  | 1.26098300  | -0.58372100 |
| H | 4.96663400  | 0.87468200  | -0.31289200 |

|   |            |             |             |
|---|------------|-------------|-------------|
| H | 3.95472400 | 1.41605400  | -1.65735900 |
| H | 3.84422800 | 2.22394600  | -0.10462400 |
| N | 3.18922500 | -0.78525000 | 0.43689200  |
| H | 4.15415500 | -0.97831800 | 0.61421000  |
| C | 2.19746400 | -1.74544300 | 0.86937100  |
| H | 1.62793100 | -2.12118000 | 0.02469700  |
| H | 2.70573700 | -2.57275600 | 1.34708000  |
| H | 1.50781300 | -1.29729800 | 1.57803800  |

Proto-C2 Complex

|   |             |             |             |
|---|-------------|-------------|-------------|
| N | 1.94962900  | 0.12501900  | -0.70151500 |
| N | 1.81620100  | -0.71395400 | 1.24636700  |
| C | 4.41646000  | 0.49481000  | -1.03034400 |
| C | 3.24668700  | 0.04866800  | -0.23404200 |
| C | 3.15263400  | -0.48581700 | 1.00570800  |
| C | 1.10145000  | -0.33927300 | 0.20254500  |
| H | 4.33818500  | 1.54969800  | -1.27701100 |
| H | 5.32491600  | 0.34148900  | -0.46082200 |
| H | 3.90951100  | -0.71941900 | 1.72453400  |
| H | 1.43002000  | -1.10921100 | 2.08410300  |
| H | 0.02852600  | -0.40193100 | 0.10087900  |
| O | -1.88238700 | -0.76392100 | -0.20053700 |
| H | 1.67280900  | 0.47955100  | -1.59919100 |
| H | 4.49186100  | -0.06689100 | -1.95701900 |
| C | -3.03471500 | -0.32793300 | -0.20087200 |
| C | -4.19309200 | -1.20069300 | -0.59308700 |
| H | -5.14482000 | -0.68307300 | -0.56611500 |
| H | -4.02077300 | -1.57858600 | -1.59577300 |
| H | -4.23150500 | -2.05149500 | 0.07995300  |
| N | -3.31117000 | 0.93115000  | 0.14570600  |
| H | -4.26288300 | 1.23787100  | 0.12794100  |
| C | -2.28575700 | 1.87086300  | 0.54428600  |
| H | -1.56980700 | 2.02549700  | -0.25717700 |
| H | -2.75826700 | 2.81510500  | 0.78060400  |
| H | -1.75330000 | 1.51350600  | 1.42031900  |

Pi-C4 Complex

|   |             |             |             |
|---|-------------|-------------|-------------|
| N | -3.87997700 | -0.12610100 | 0.02142400  |
| N | -2.22926100 | -1.52691900 | 0.38573200  |
| C | -2.73070400 | 2.04096900  | -0.52886300 |
| C | -2.73077700 | 0.60063400  | -0.16063200 |
| C | -1.72090500 | -0.28719900 | 0.06997400  |
| C | -3.52694500 | -1.38947900 | 0.34603400  |
| H | -3.23418400 | 2.64571400  | 0.22200400  |
| H | -1.70966200 | 2.39556700  | -0.61686800 |
| H | -0.66343600 | -0.10321400 | 0.02734700  |
| O | 1.71211400  | 0.24496400  | -0.02086400 |
| H | -4.81744600 | 0.21484800  | -0.06943200 |
| H | -4.25138500 | -2.15695900 | 0.53989400  |
| H | -3.22988000 | 2.21066300  | -1.48019600 |
| C | 2.91485400  | 0.45424000  | 0.11878600  |
| C | 3.43042200  | 1.80249600  | 0.54249400  |
| H | 3.11158600  | 2.54210200  | -0.18532300 |
| H | 2.98373800  | 2.06258500  | 1.49694200  |
| H | 4.50992100  | 1.83771700  | 0.63430500  |
| N | 3.82830700  | -0.50007400 | -0.09754600 |
| H | 4.79556400  | -0.28030000 | 0.02754800  |
| C | 3.46850700  | -1.83837200 | -0.51147400 |
| H | 4.37430900  | -2.42217000 | -0.61072200 |
| H | 2.82240800  | -2.31028700 | 0.22231400  |

H 2.95137100 -1.82405200 -1.46607600

Pi-C2 Complex

N 2.23119600 0.69806000 -0.07377800  
N 2.14168000 -1.47845500 0.18812900  
C 4.69325900 1.20603800 -0.14123200  
C 3.53645300 0.27939500 -0.02688600  
C 3.45445600 -1.07200900 0.13575400  
C 1.43410100 -0.38665600 0.05870200  
H 4.68948800 1.94984400 0.65233400  
H 5.61934300 0.64584700 -0.07243700  
H 4.26629900 -1.76964500 0.21752500  
H 0.36106500 -0.31866500 0.05316700  
O -1.84375200 0.07418900 0.04273100  
H 1.91757300 1.64255700 -0.18636900  
H 4.68937300 1.73524200 -1.09146500  
C -2.98569600 -0.37342400 -0.04037600  
C -3.23817400 -1.84945400 -0.18185800  
H -2.72048500 -2.20850800 -1.06566300  
H -2.81699600 -2.35923700 0.67904100  
H -4.29036600 -2.09763000 -0.26111000  
N -4.06002200 0.42334400 -0.00858600  
H -4.96873300 0.01212500 -0.07775000  
C -3.95679700 1.85975600 0.12689300  
H -4.95515800 2.27736500 0.12661200  
H -3.46222600 2.12728500 1.05561000  
H -3.39475400 2.28738300 -0.69767100
